# Supplementary material for: Highly enantioselective synthesis of 5-phenyl-2-alkylprolines using phase-transfer catalytic alkylation
Source: Royal Society of Chemistry journal article supplement (doi:10.1039/c3ob27089k), 2013-01-01
Supplement: c3ob27089k.pdf [file c3ob27089k.pdf]

Supporting Information

## Highly Enantioselective Synthesis of 2-Phenyl-5-alkylprolines using Phase-transfer Catalytic Alkylation

Myungmo Lee,<sup>a</sup> Young-Ju Lee,<sup>a</sup> Eunyoung Park,<sup>a</sup> Yohan Park,<sup>b</sup> Min Woo Ha,<sup>a</sup>, Suckchang Hong,<sup>a</sup> Yeon-Ju Lee,<sup>c</sup>  
Taek-Soo Kim,<sup>a</sup> Mi-hyun Kim,<sup>a</sup> and Hyeung-geun Park<sup>a\*</sup>

<sup>a</sup>*Research Institute of Pharmaceutical Sciences and College of Pharmacy, Seoul National University, Seoul 151-742, Korea,*

<sup>b</sup>*College of Pharmacy, Inje University, 607 Obang-dong, Gimhae, Gyeongnam 621-749, Korea,*

<sup>c</sup>*Marine Natural Products Chemistry Laboratory, Korea Ocean Research and Development Institute, Ansan 426-744, Korea*

[hgpk@snu.ac.kr](mailto:hgpk@snu.ac.kr)

### Contents

|                                              |      |
|----------------------------------------------|------|
| <sup>1</sup> H & <sup>13</sup> C NMR Spectra | S-2  |
| Chiral HPLC Chromatogram                     | S-30 |

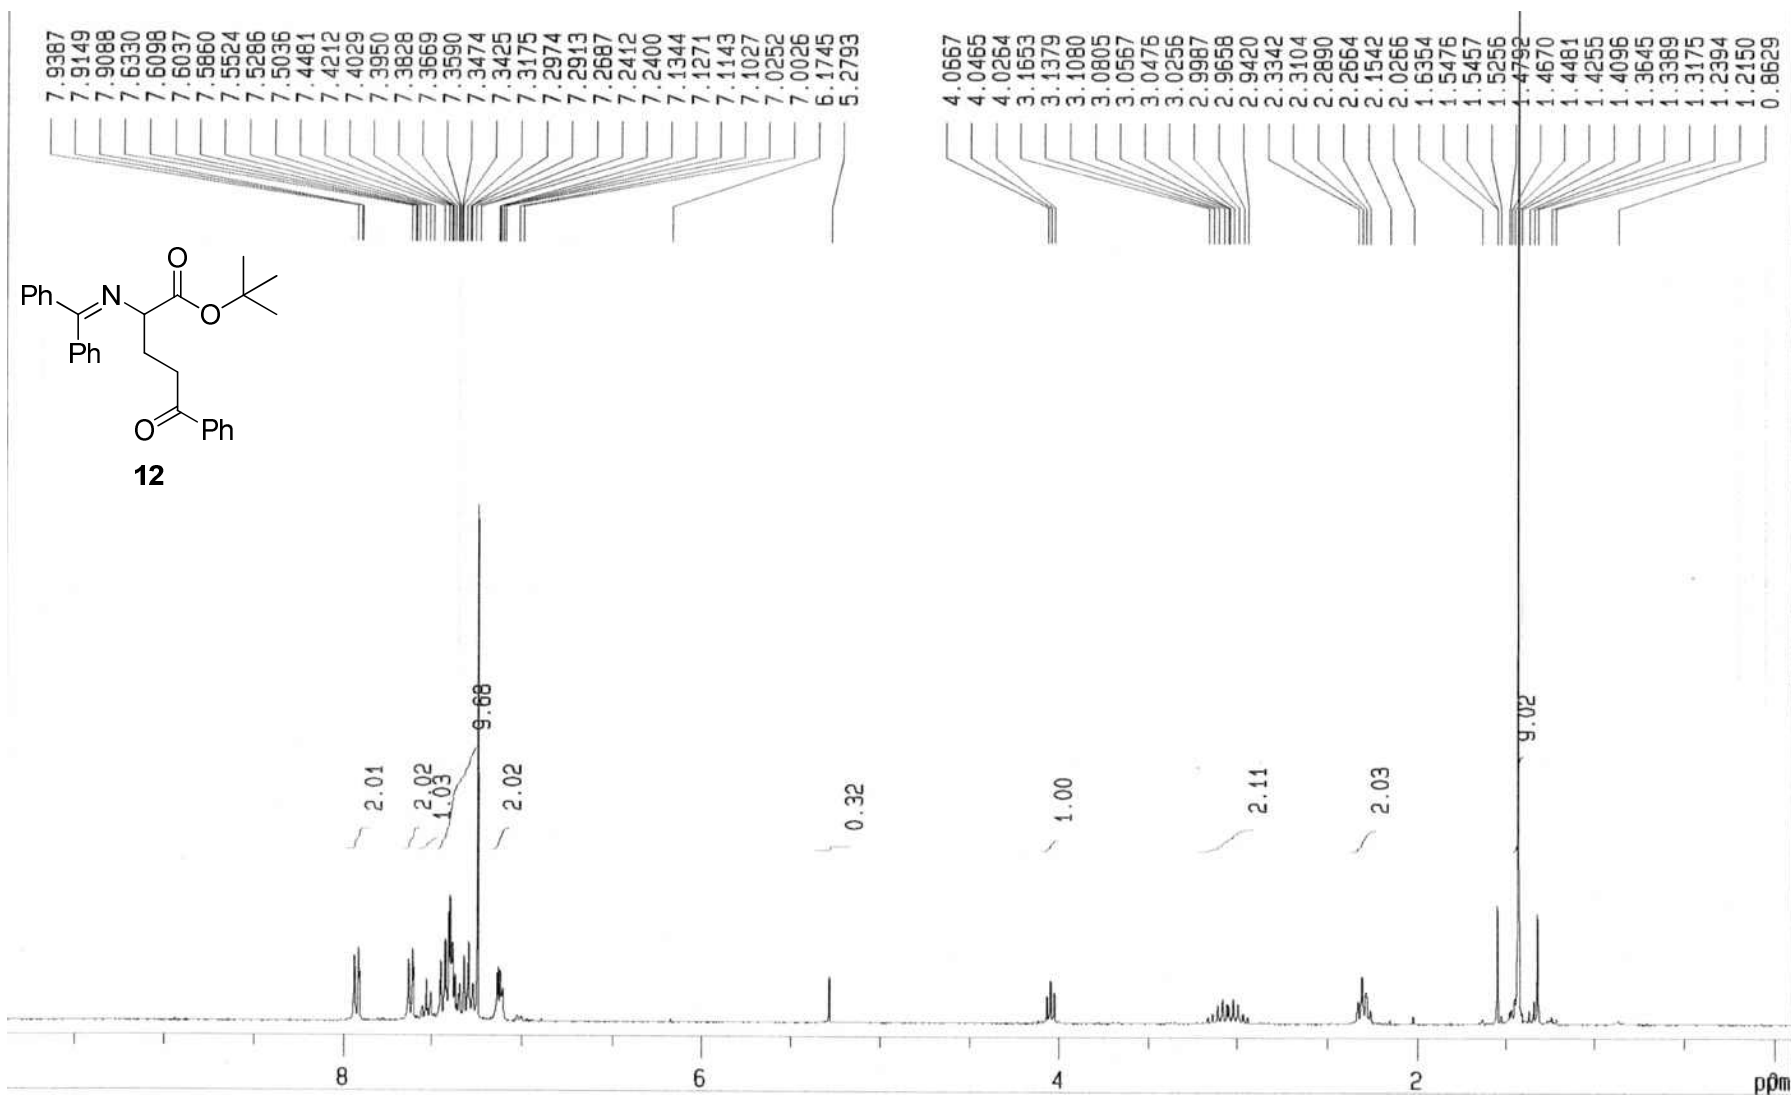

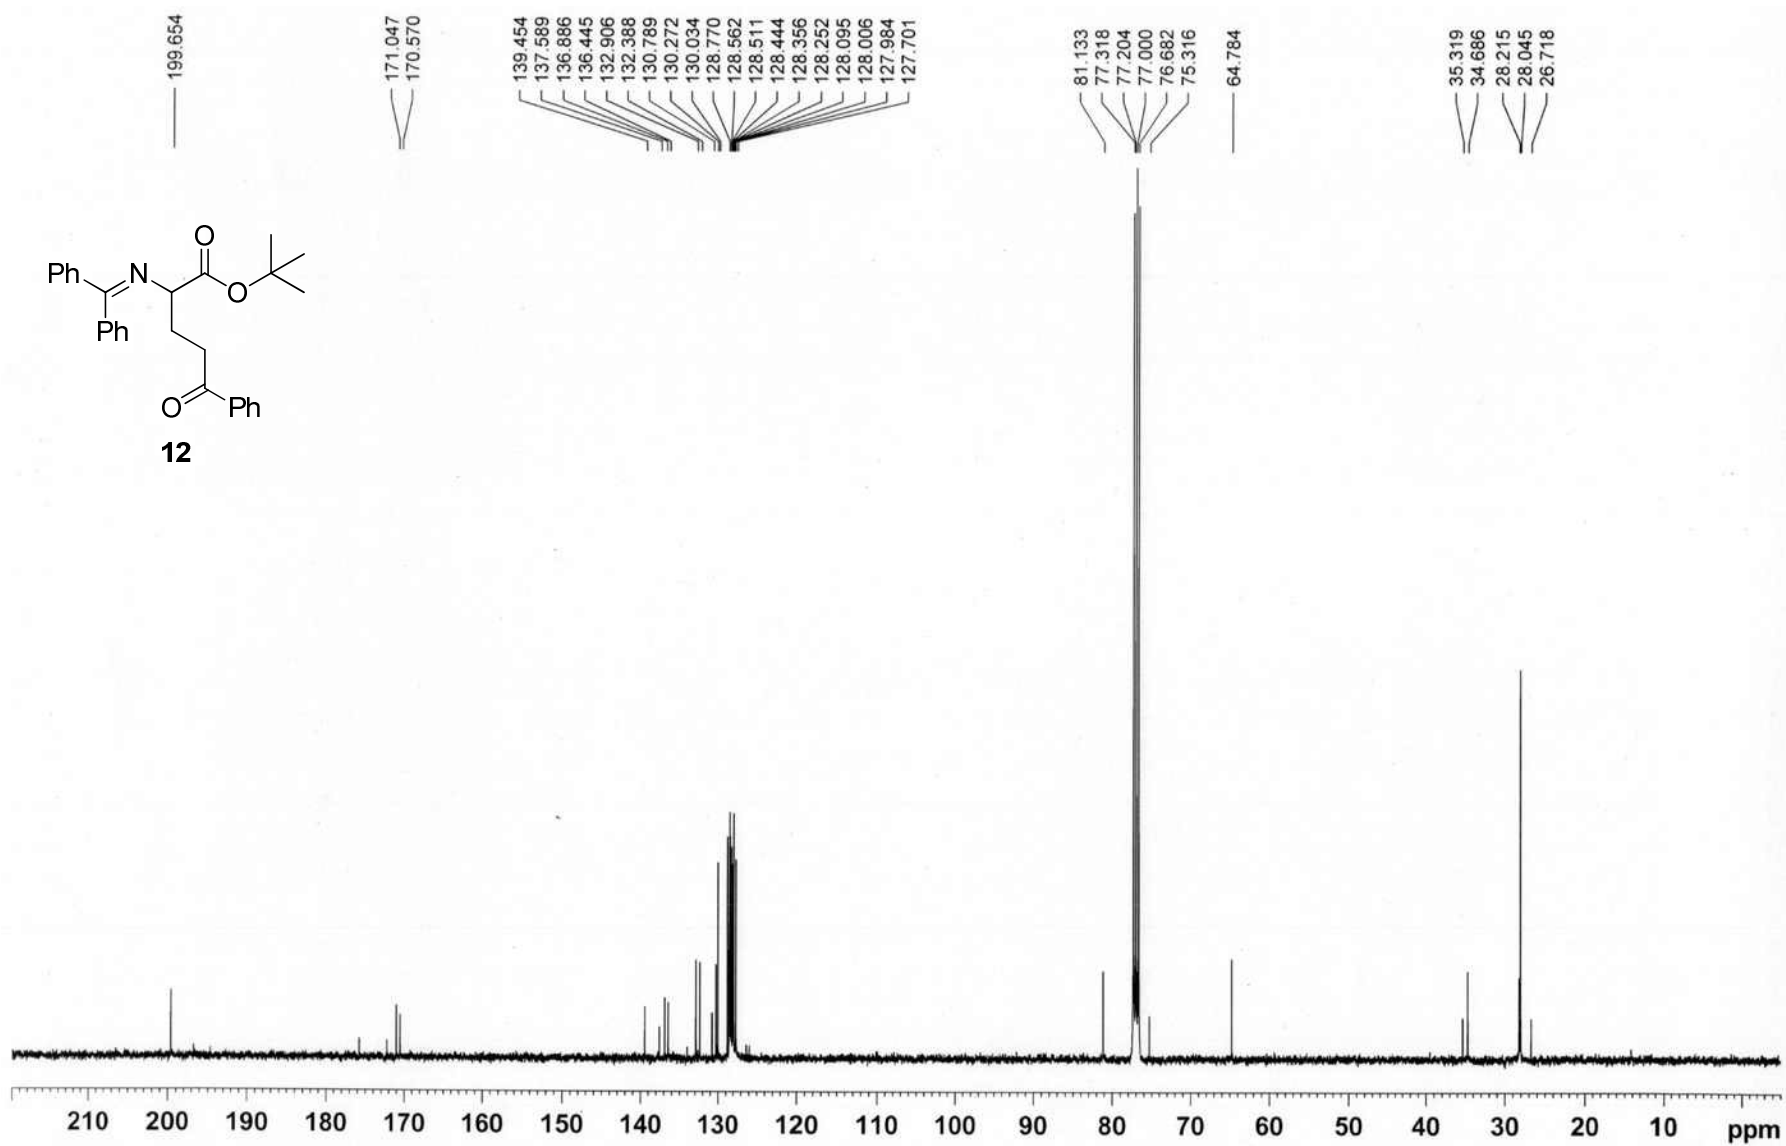

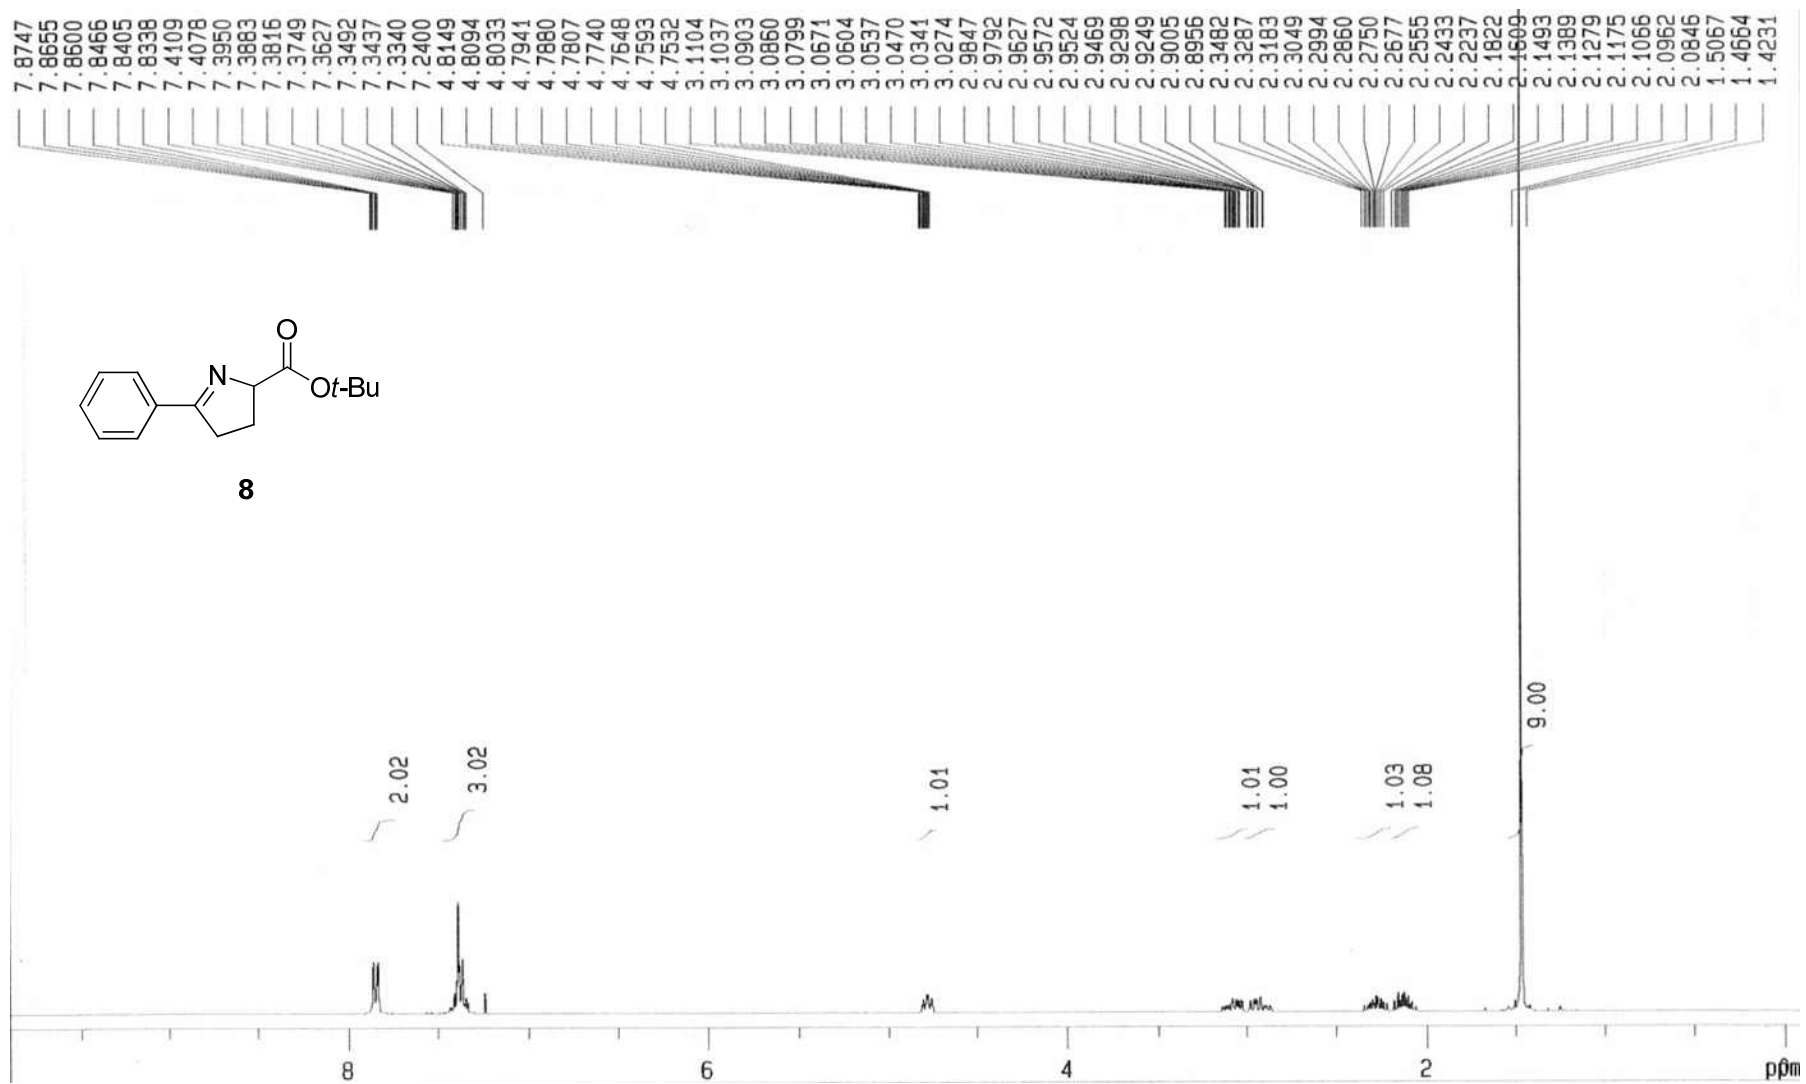

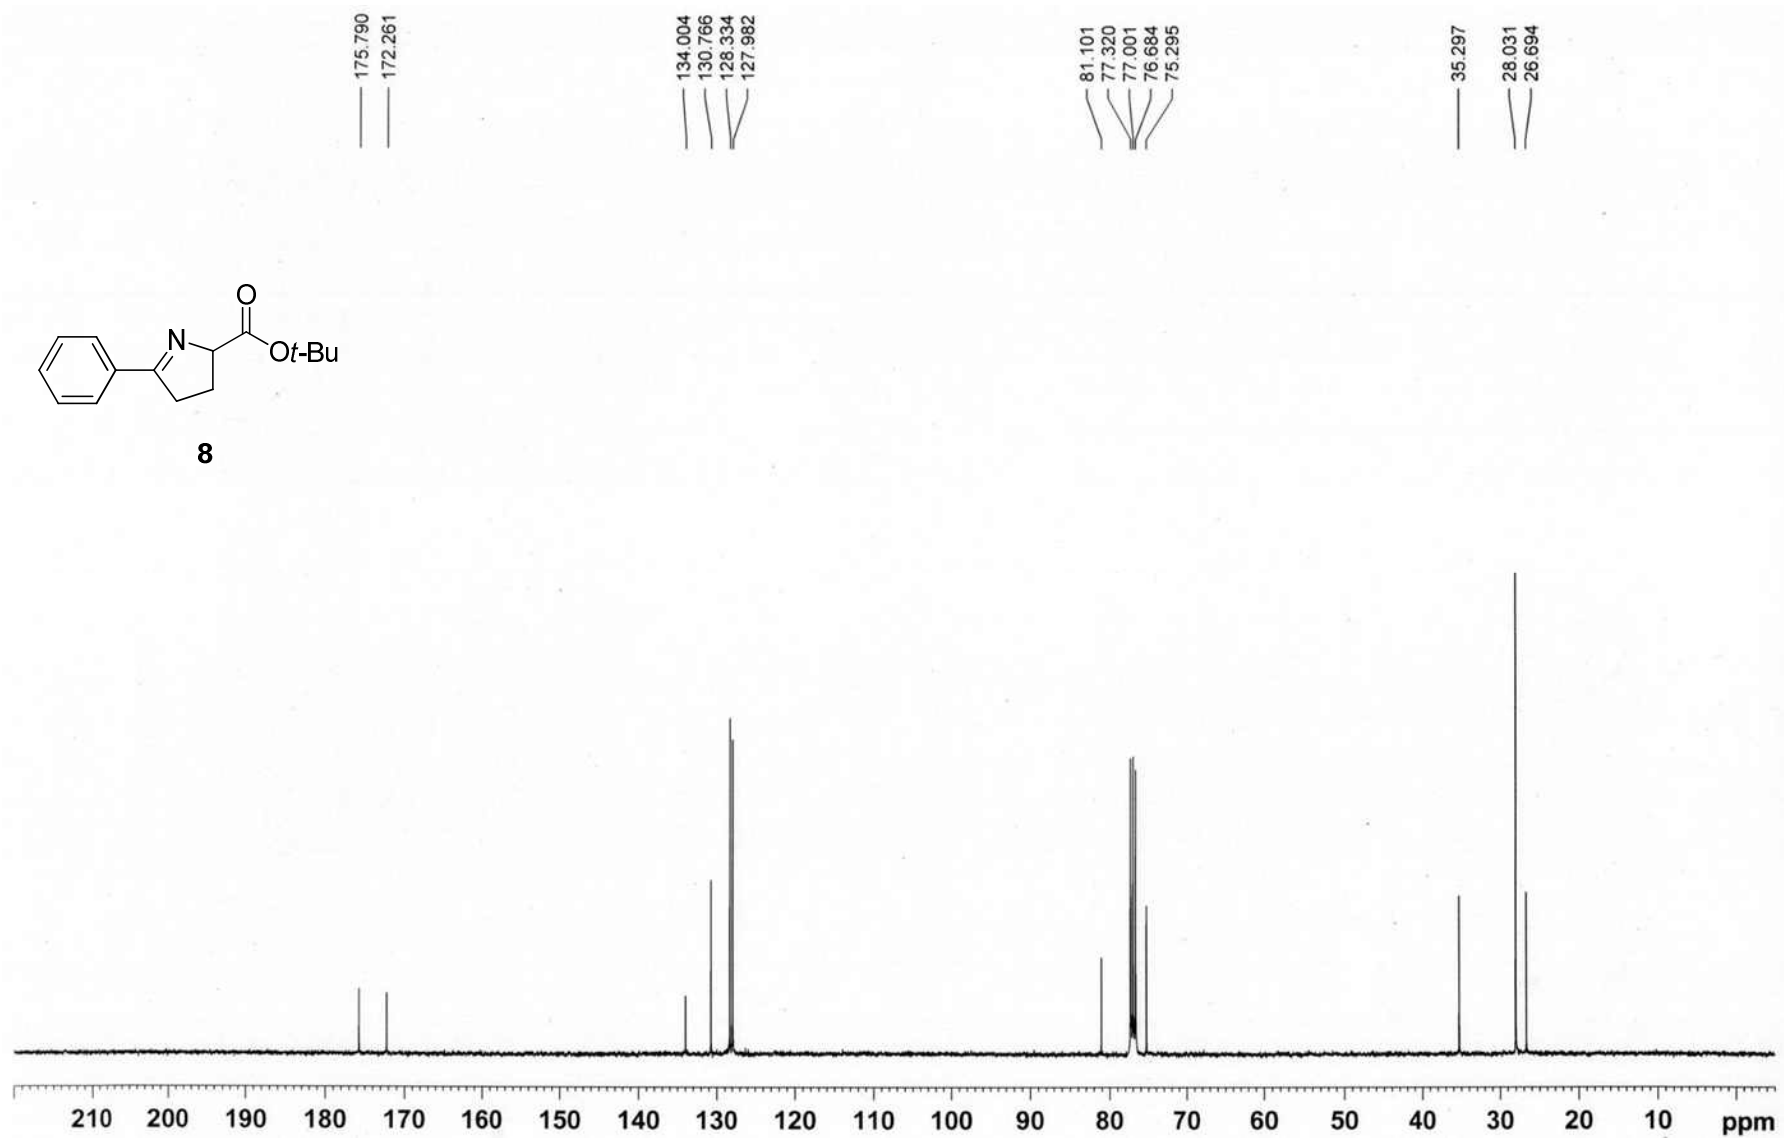

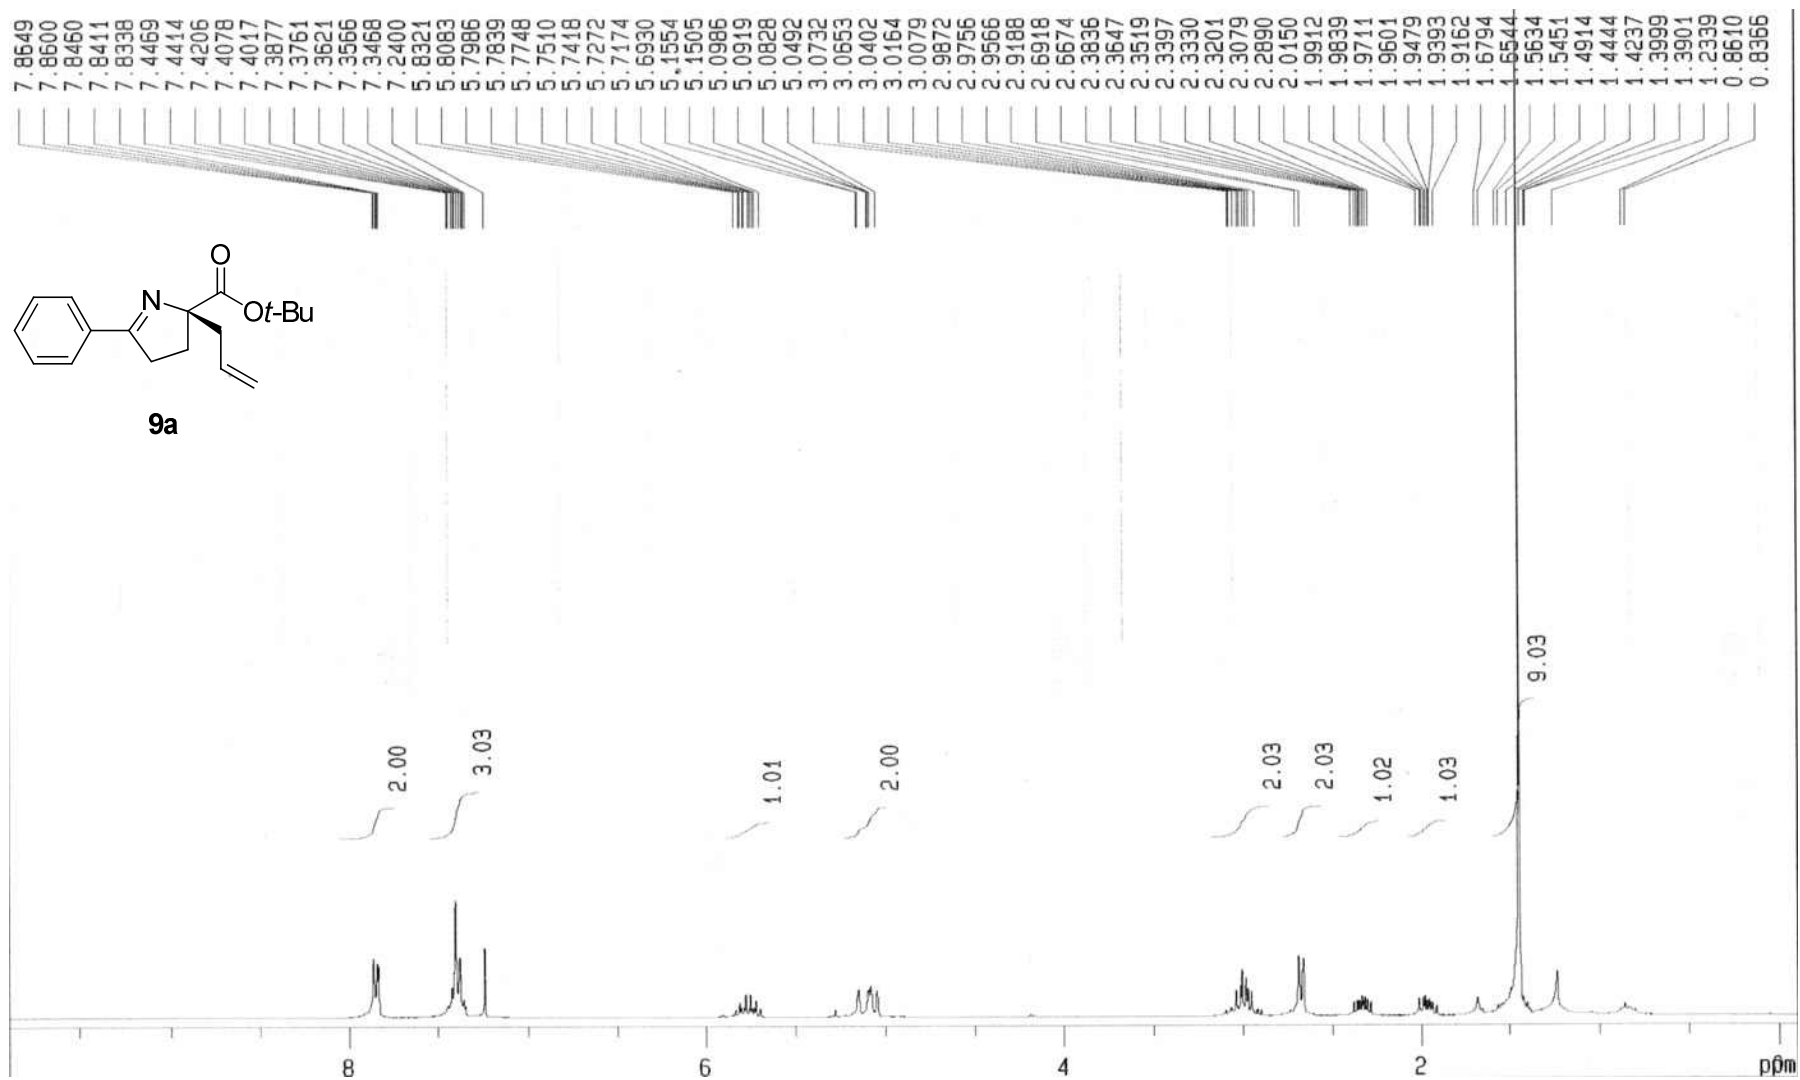

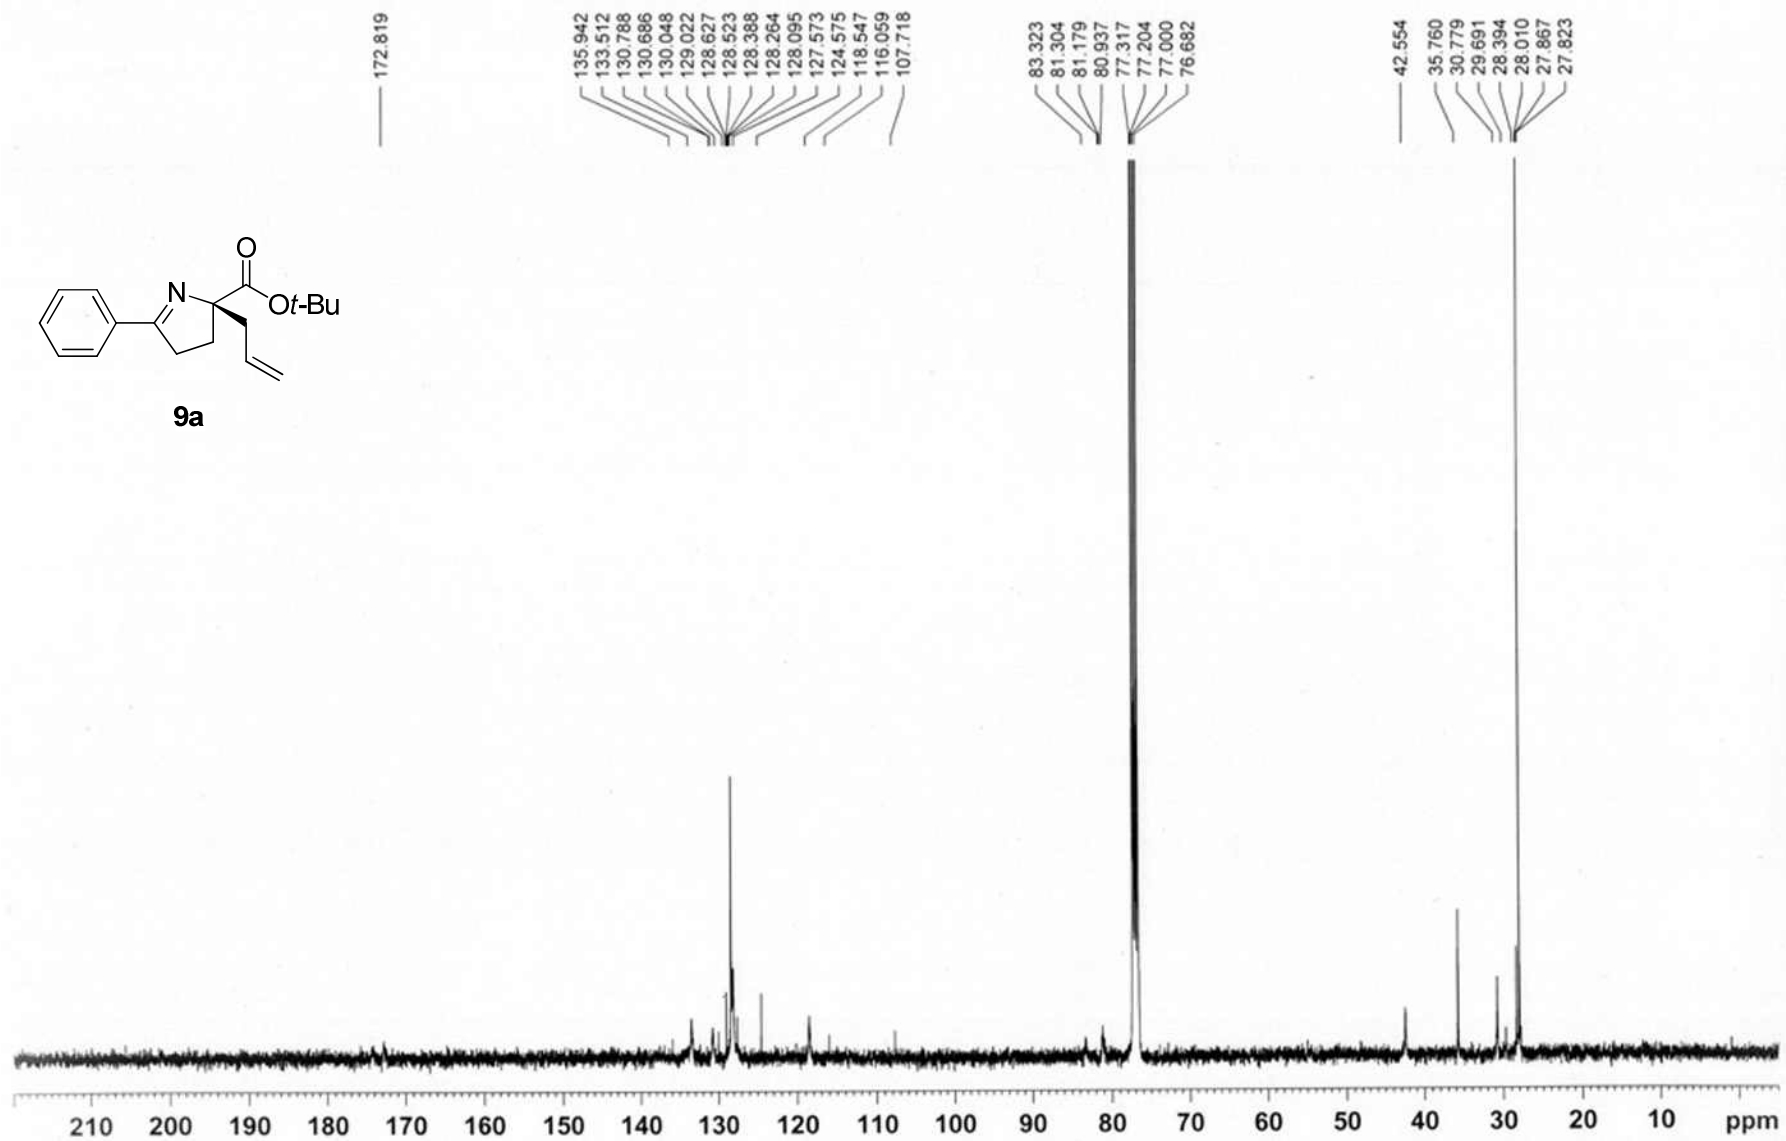

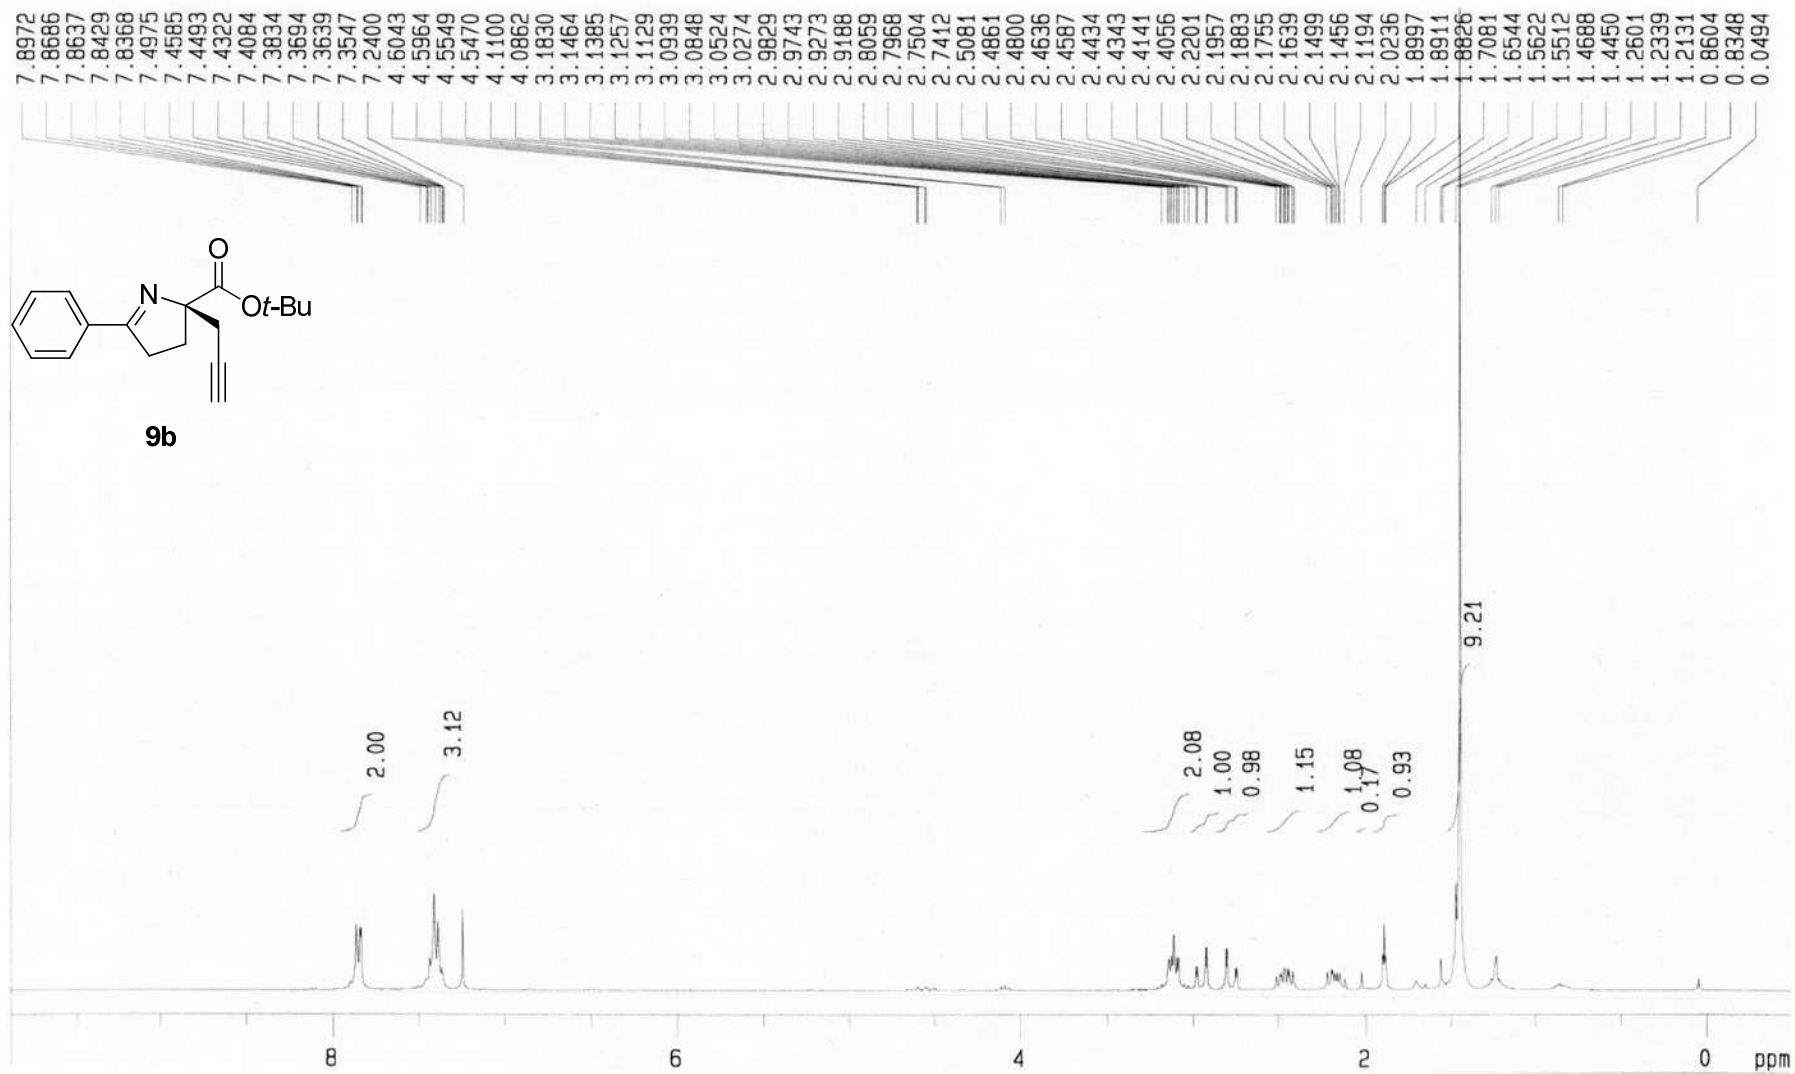



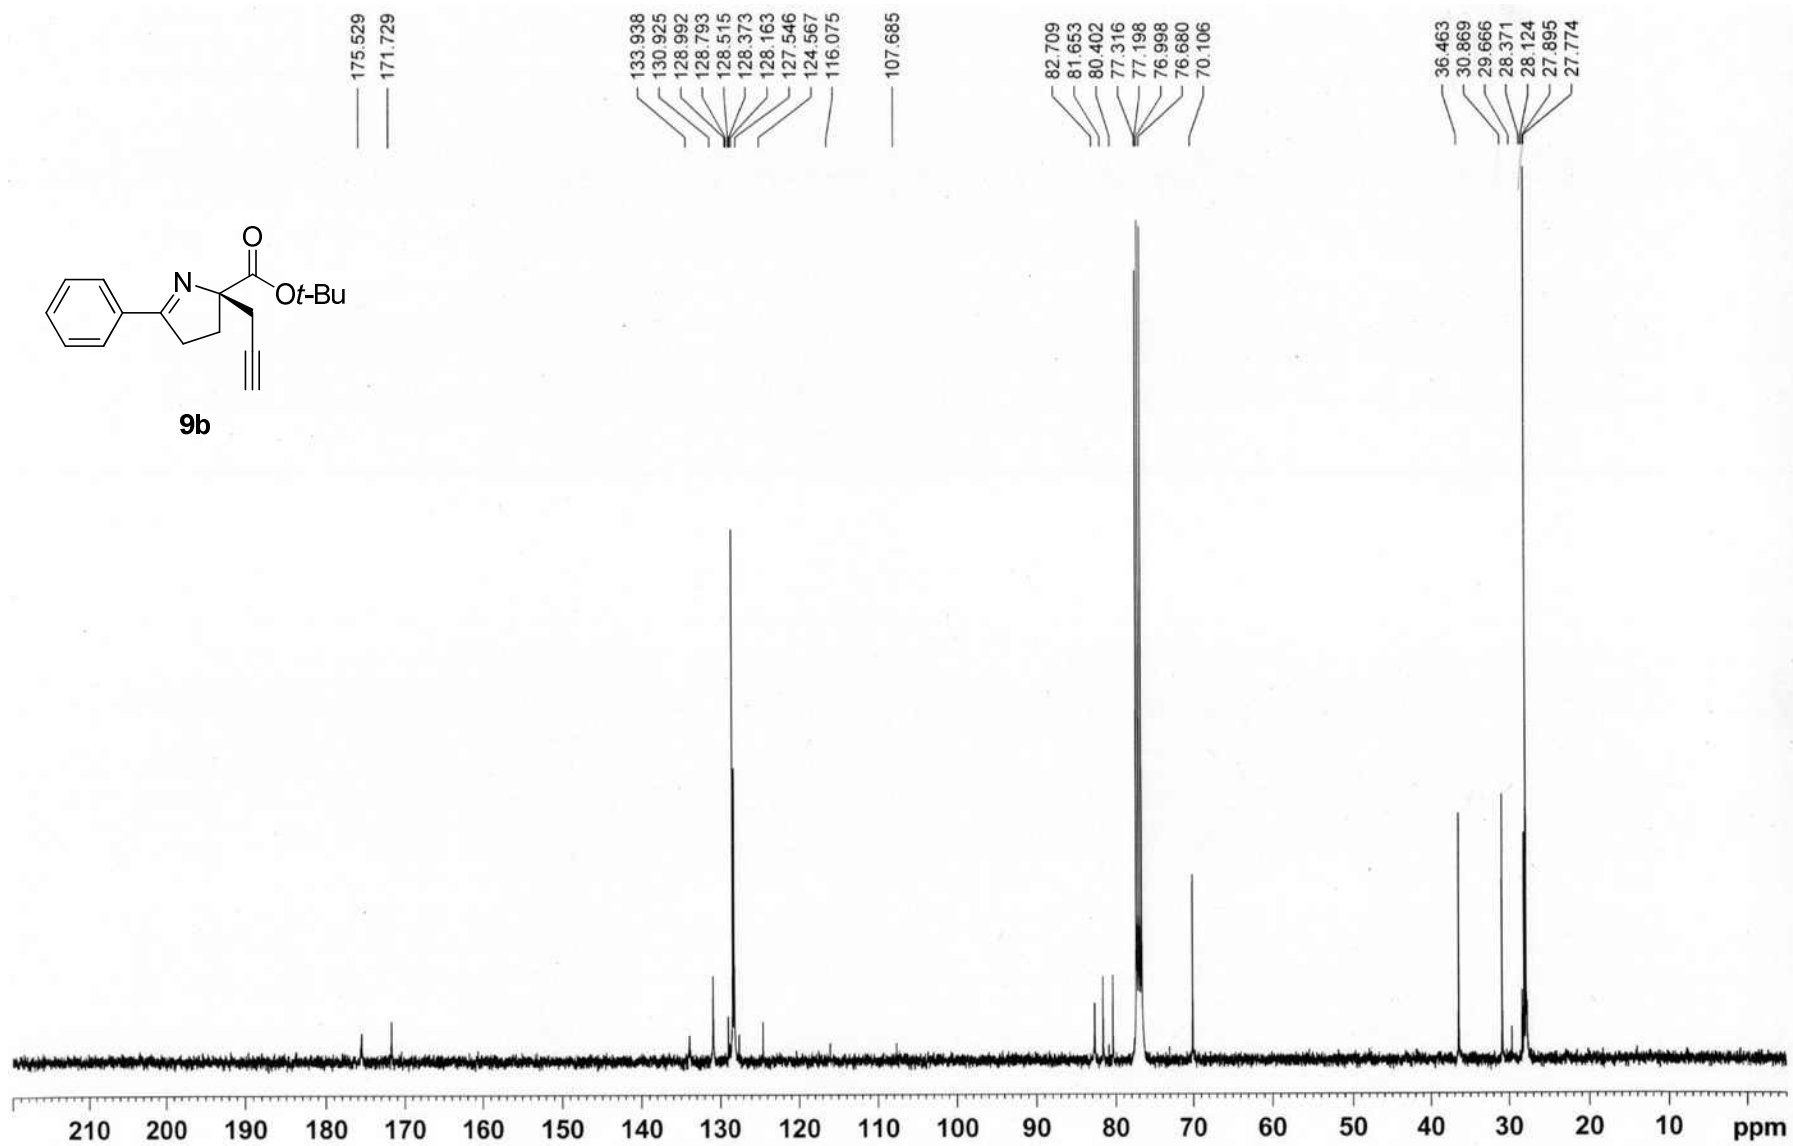

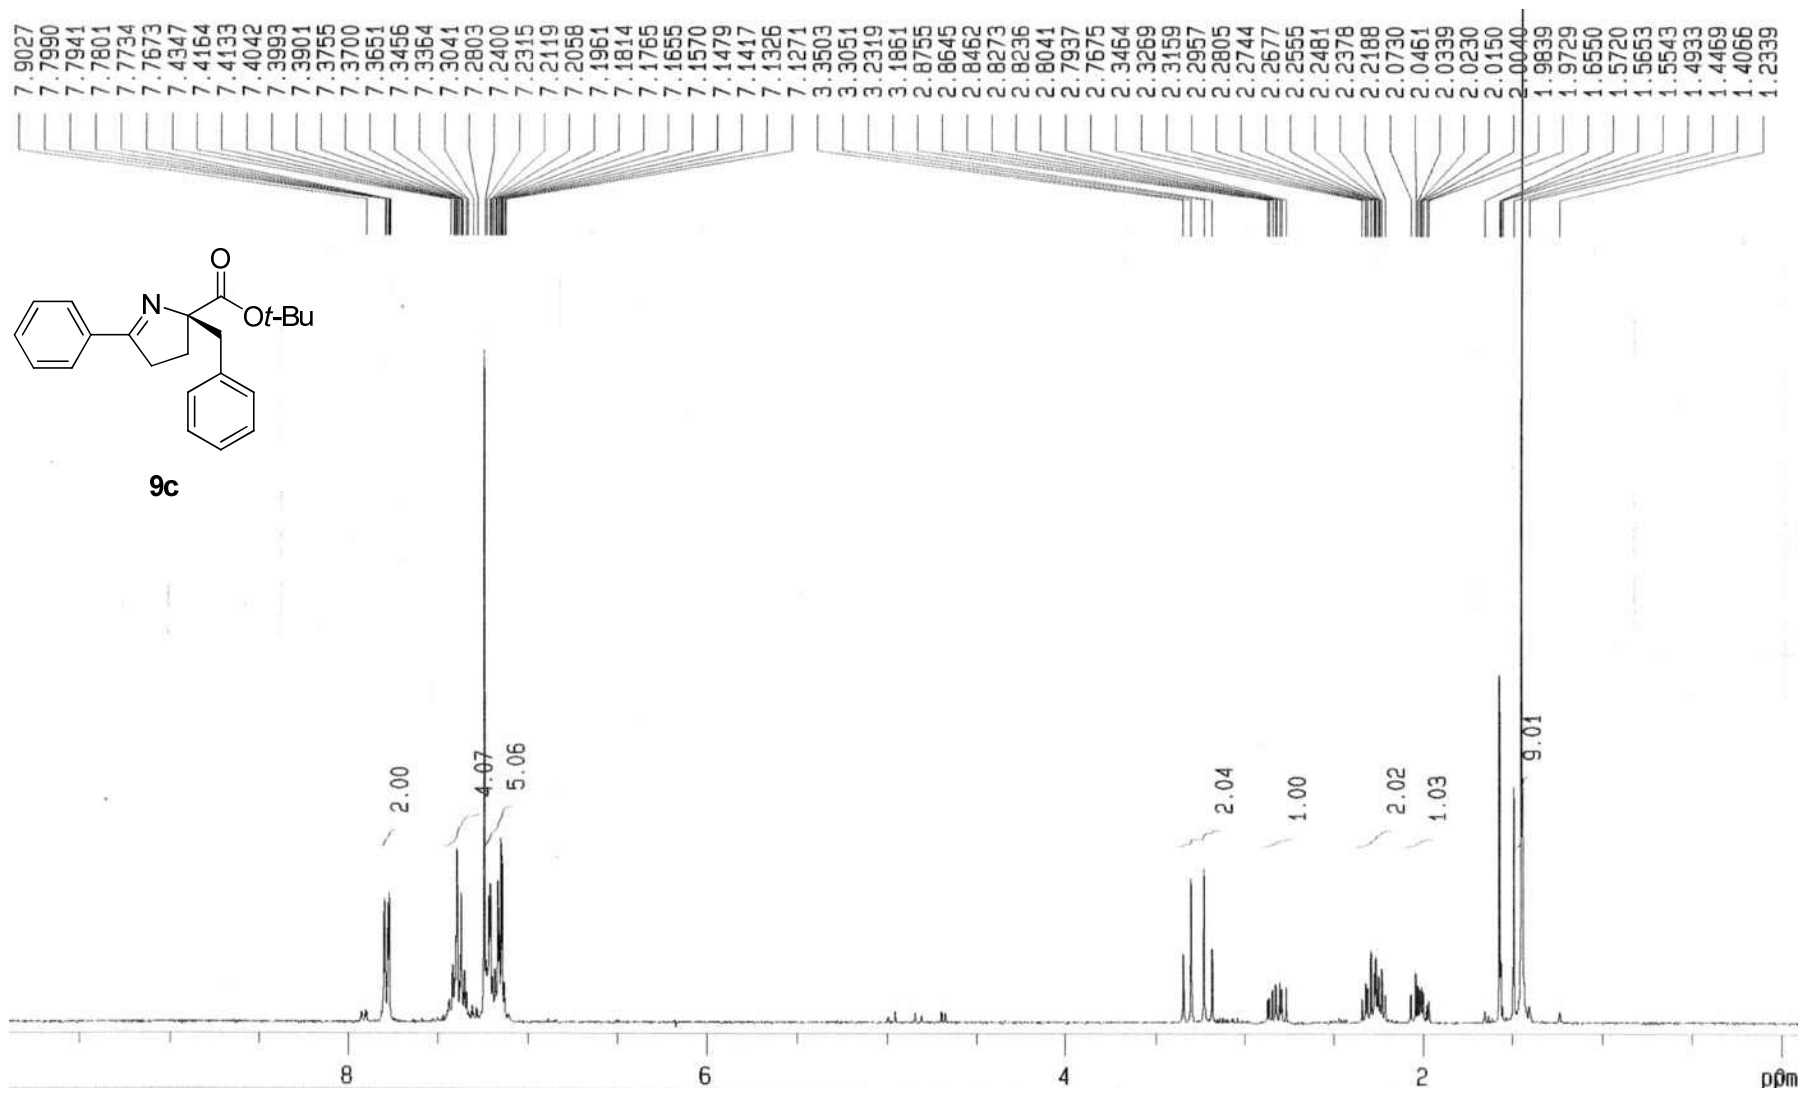

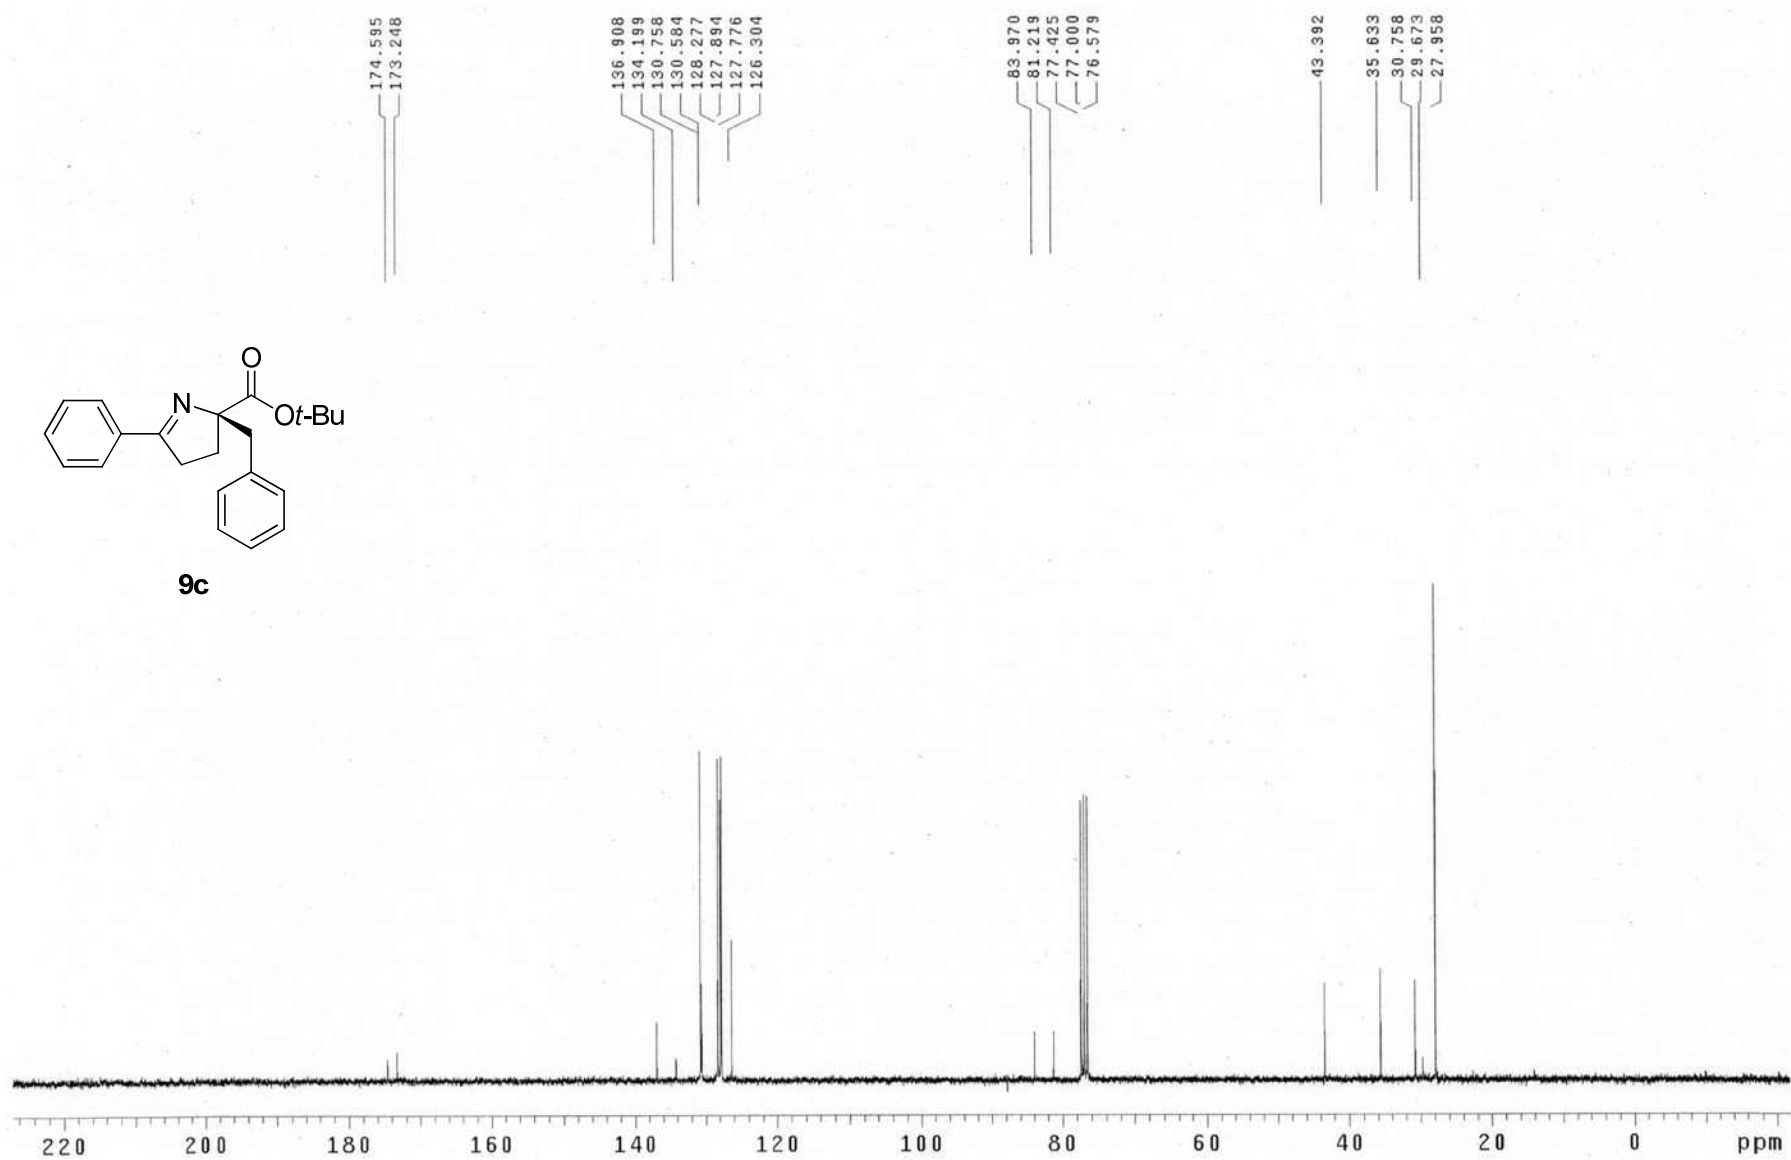

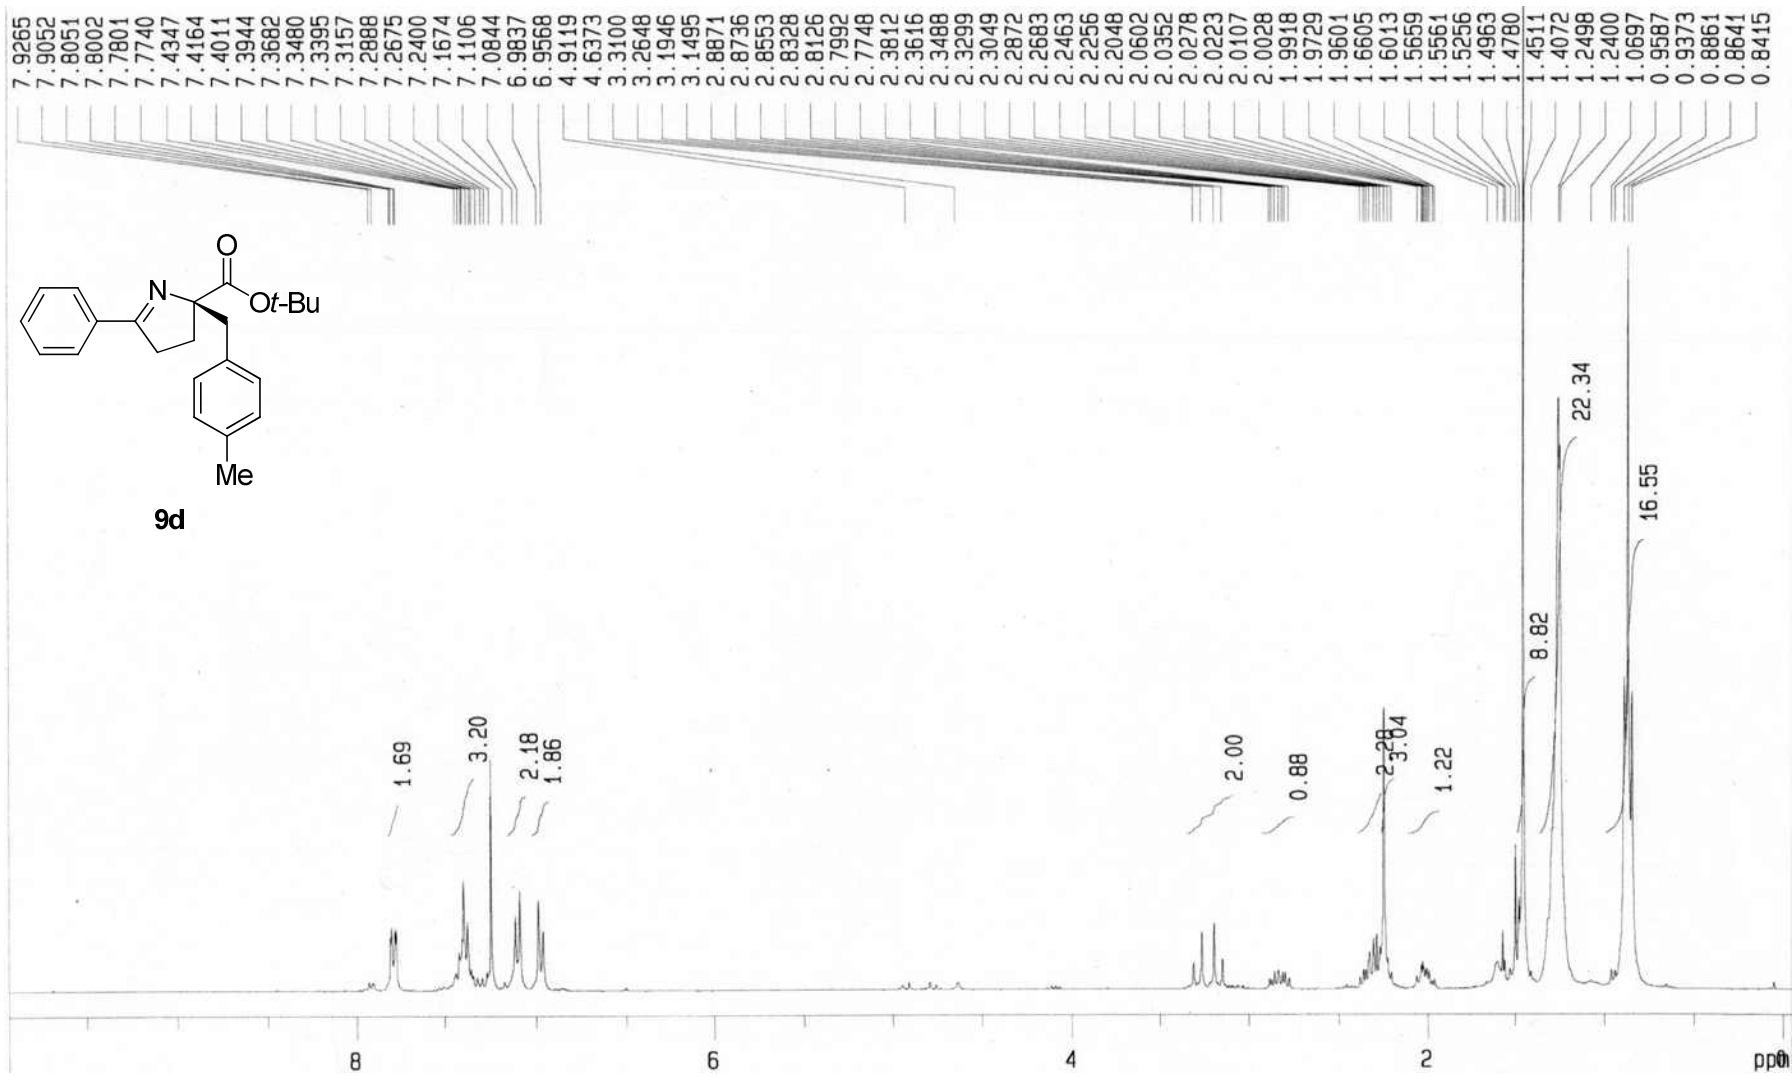

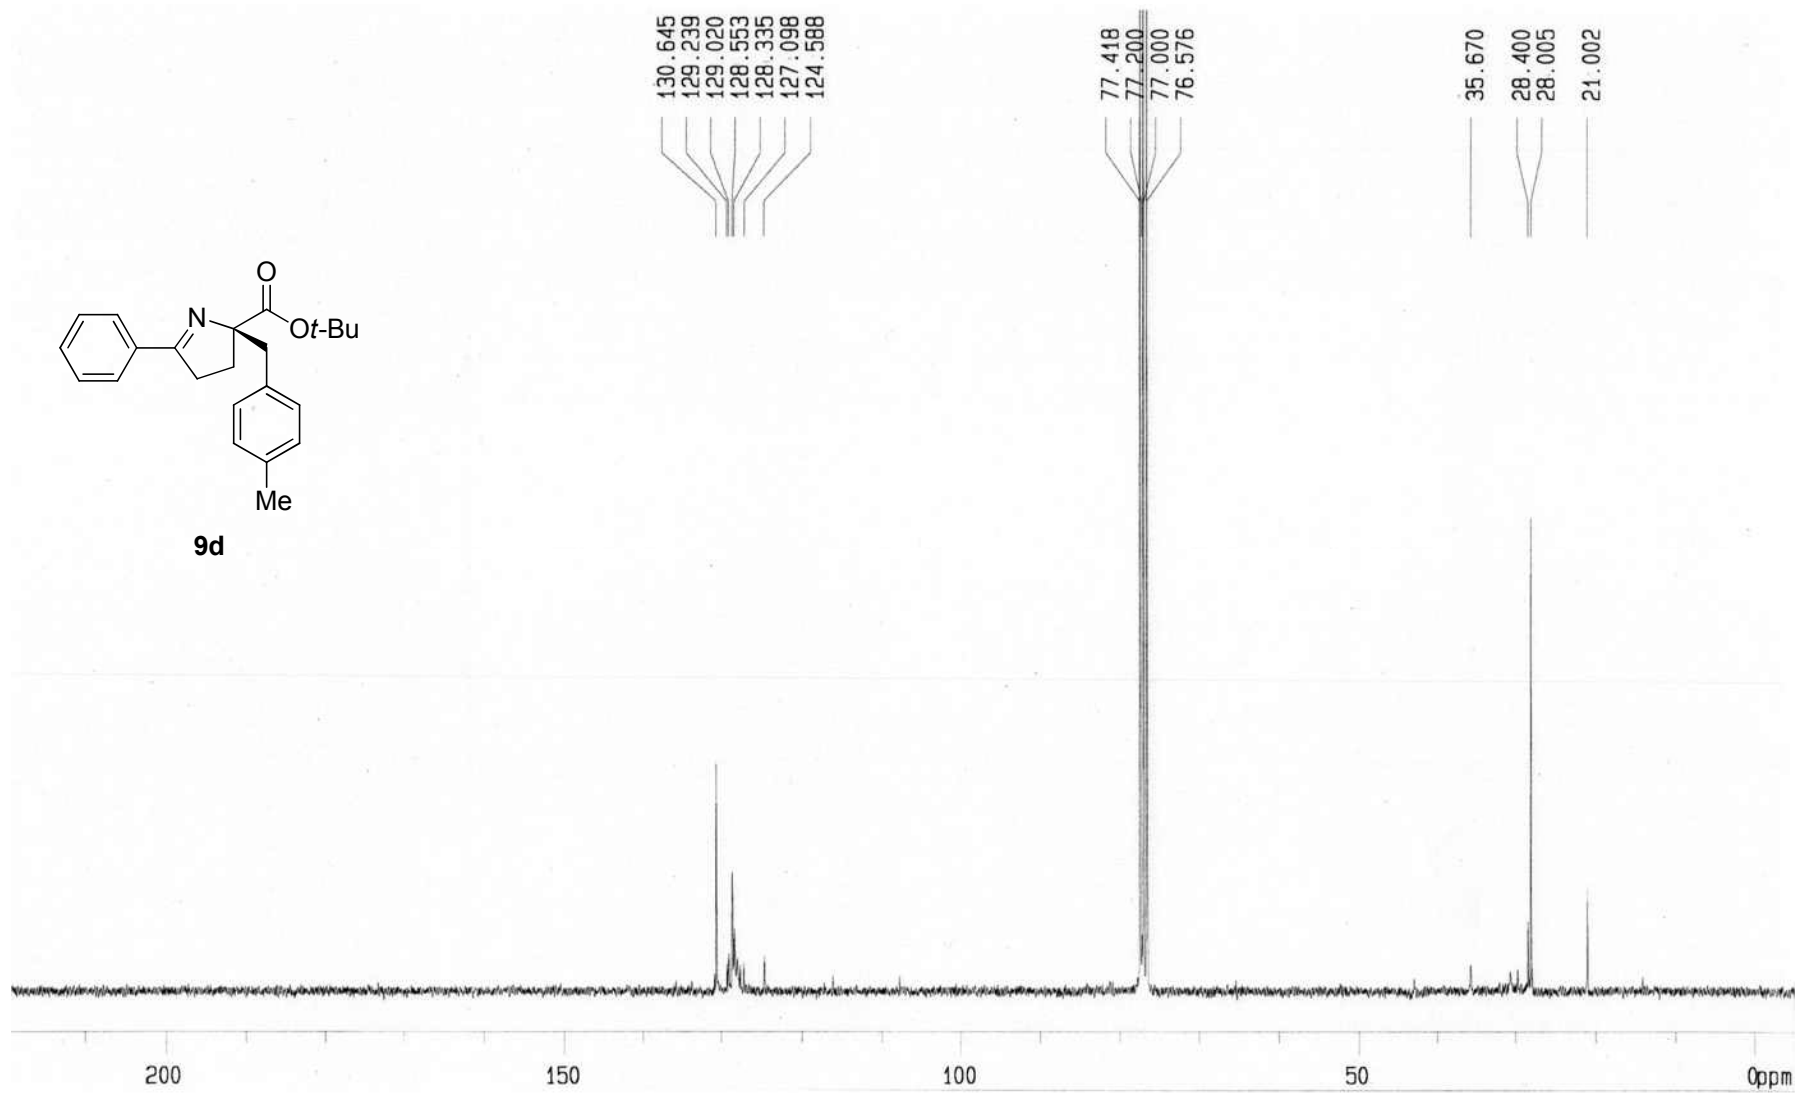

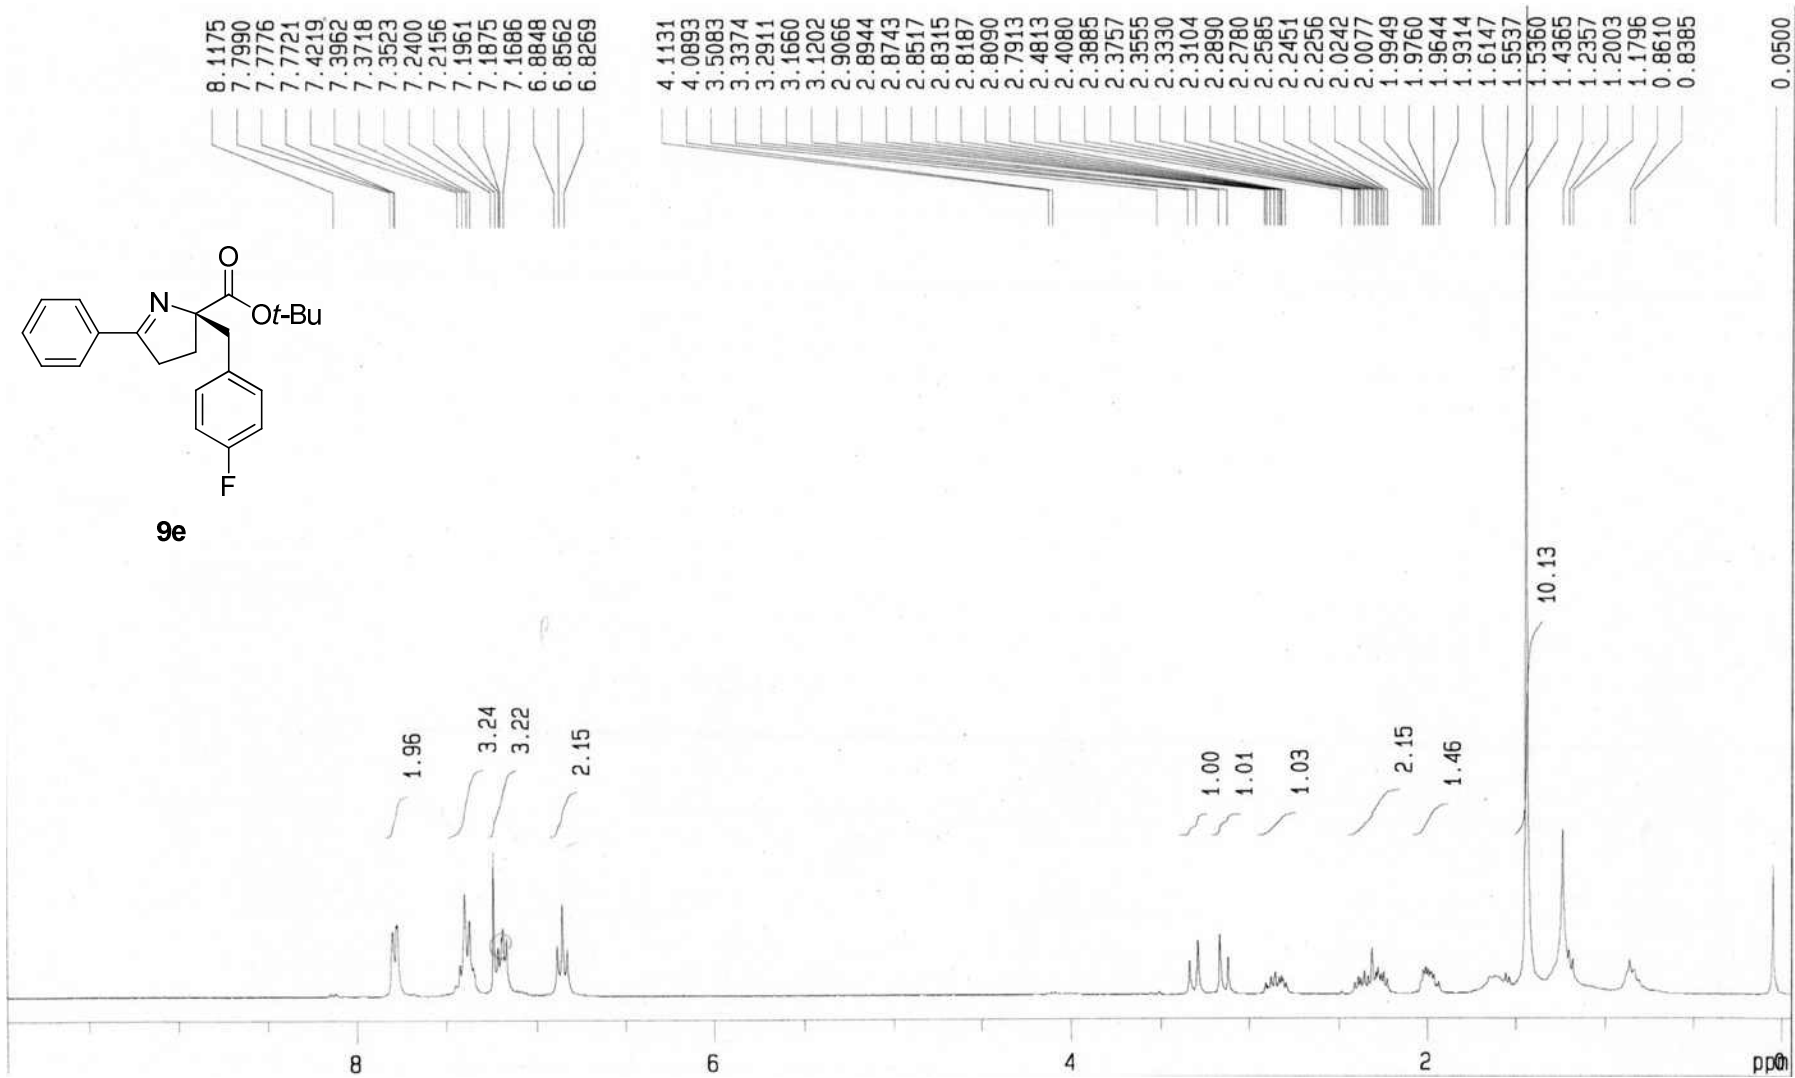

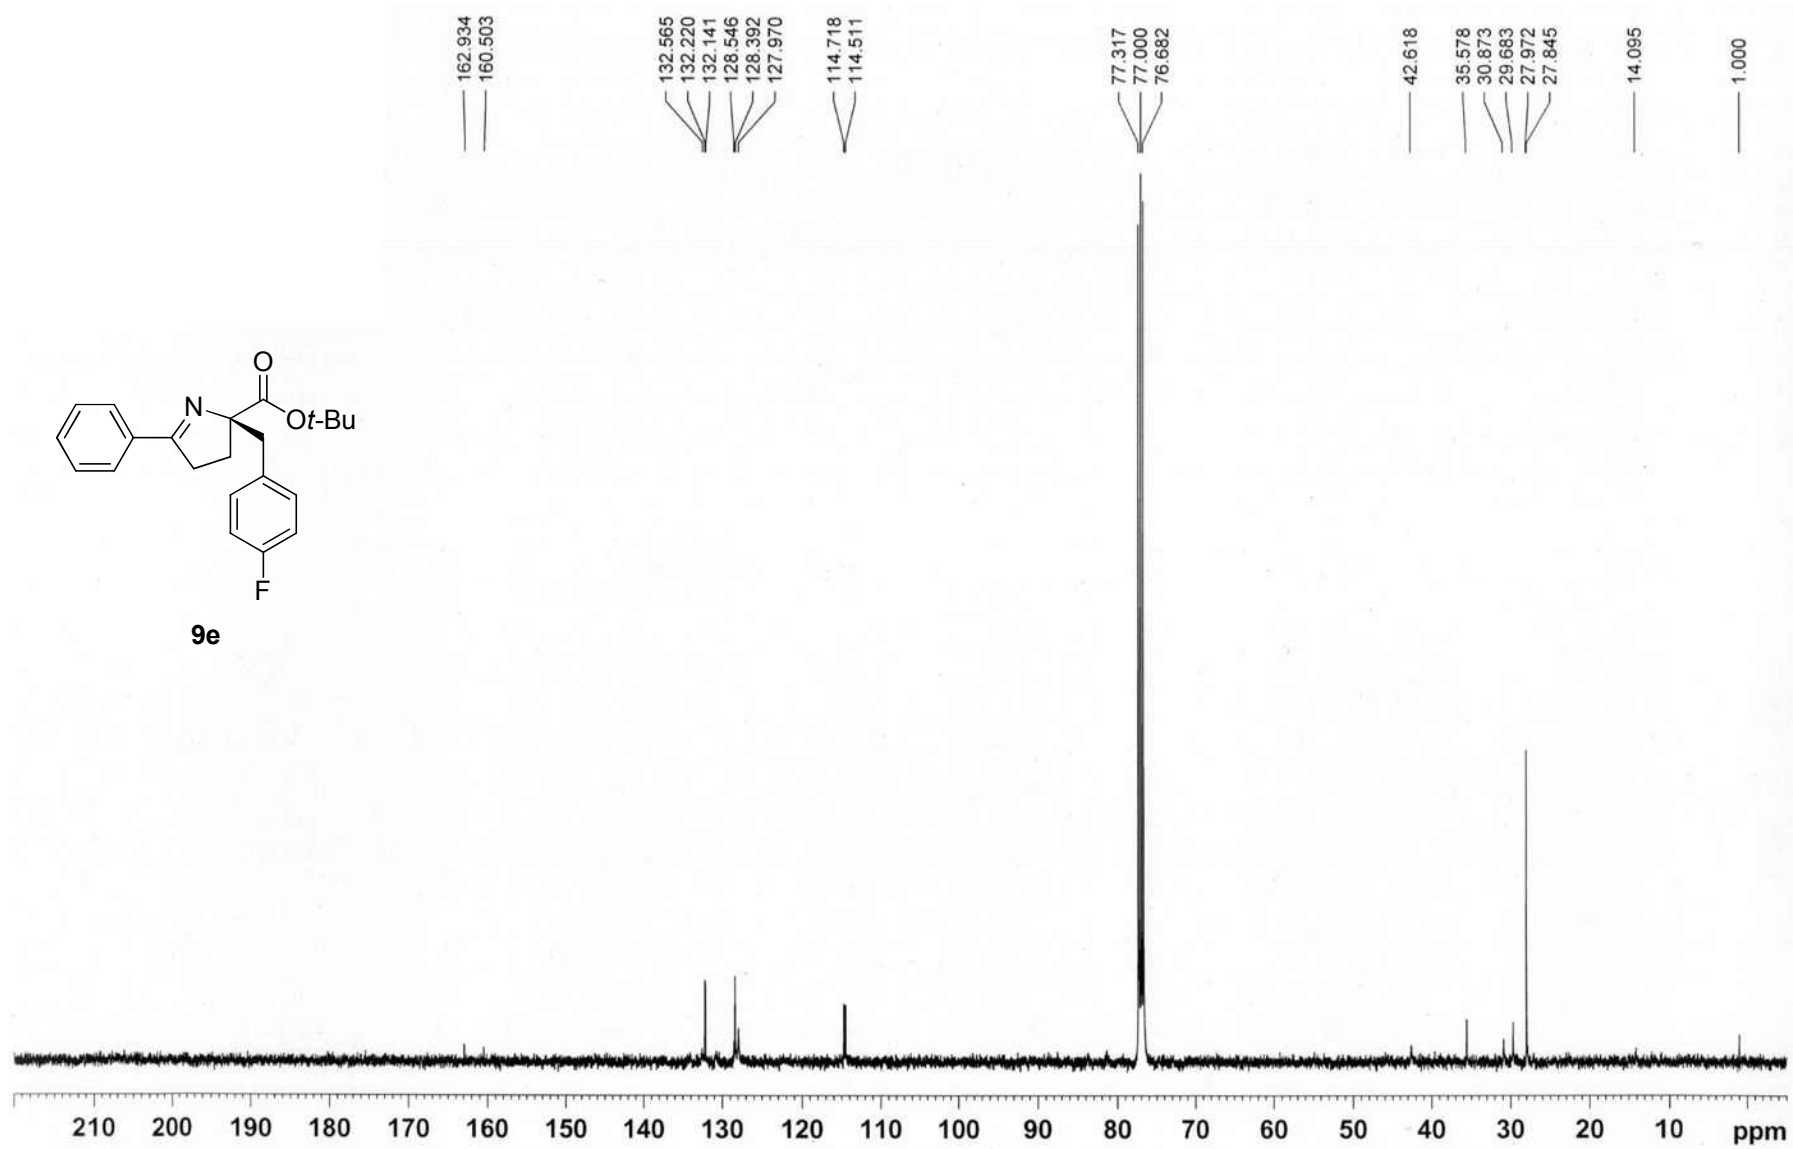

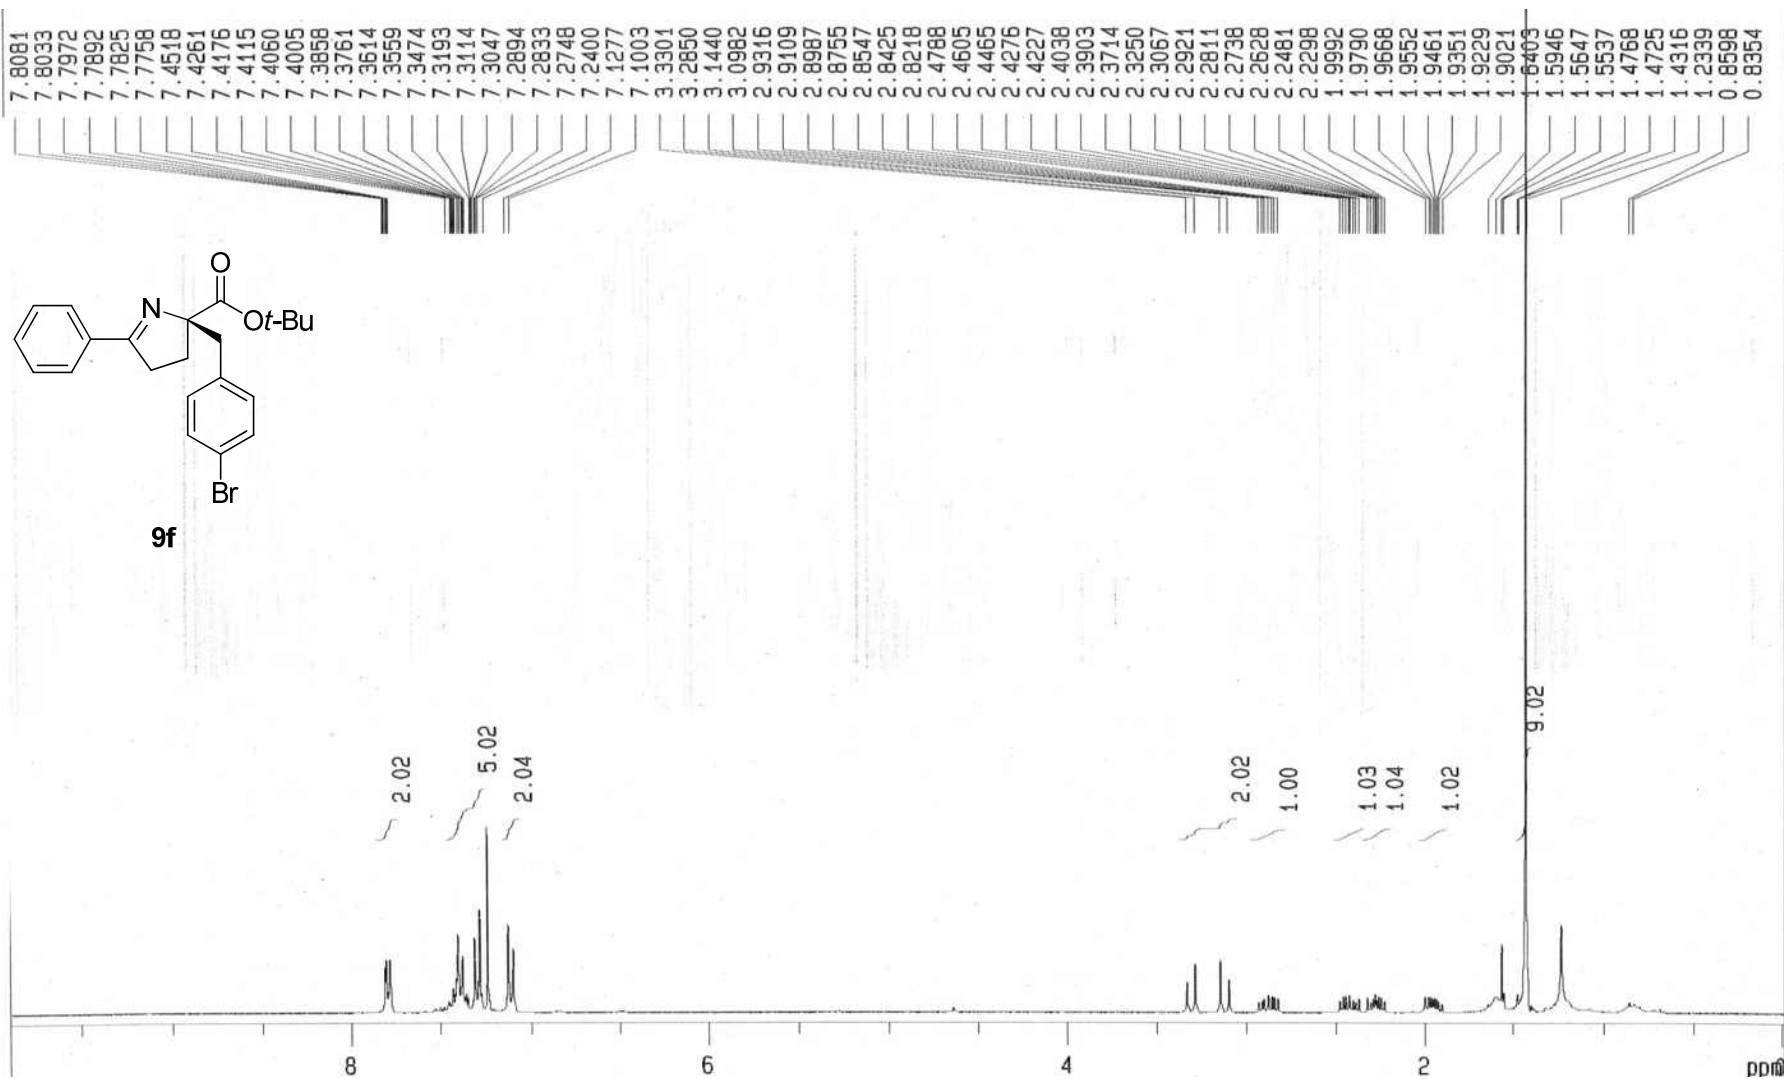



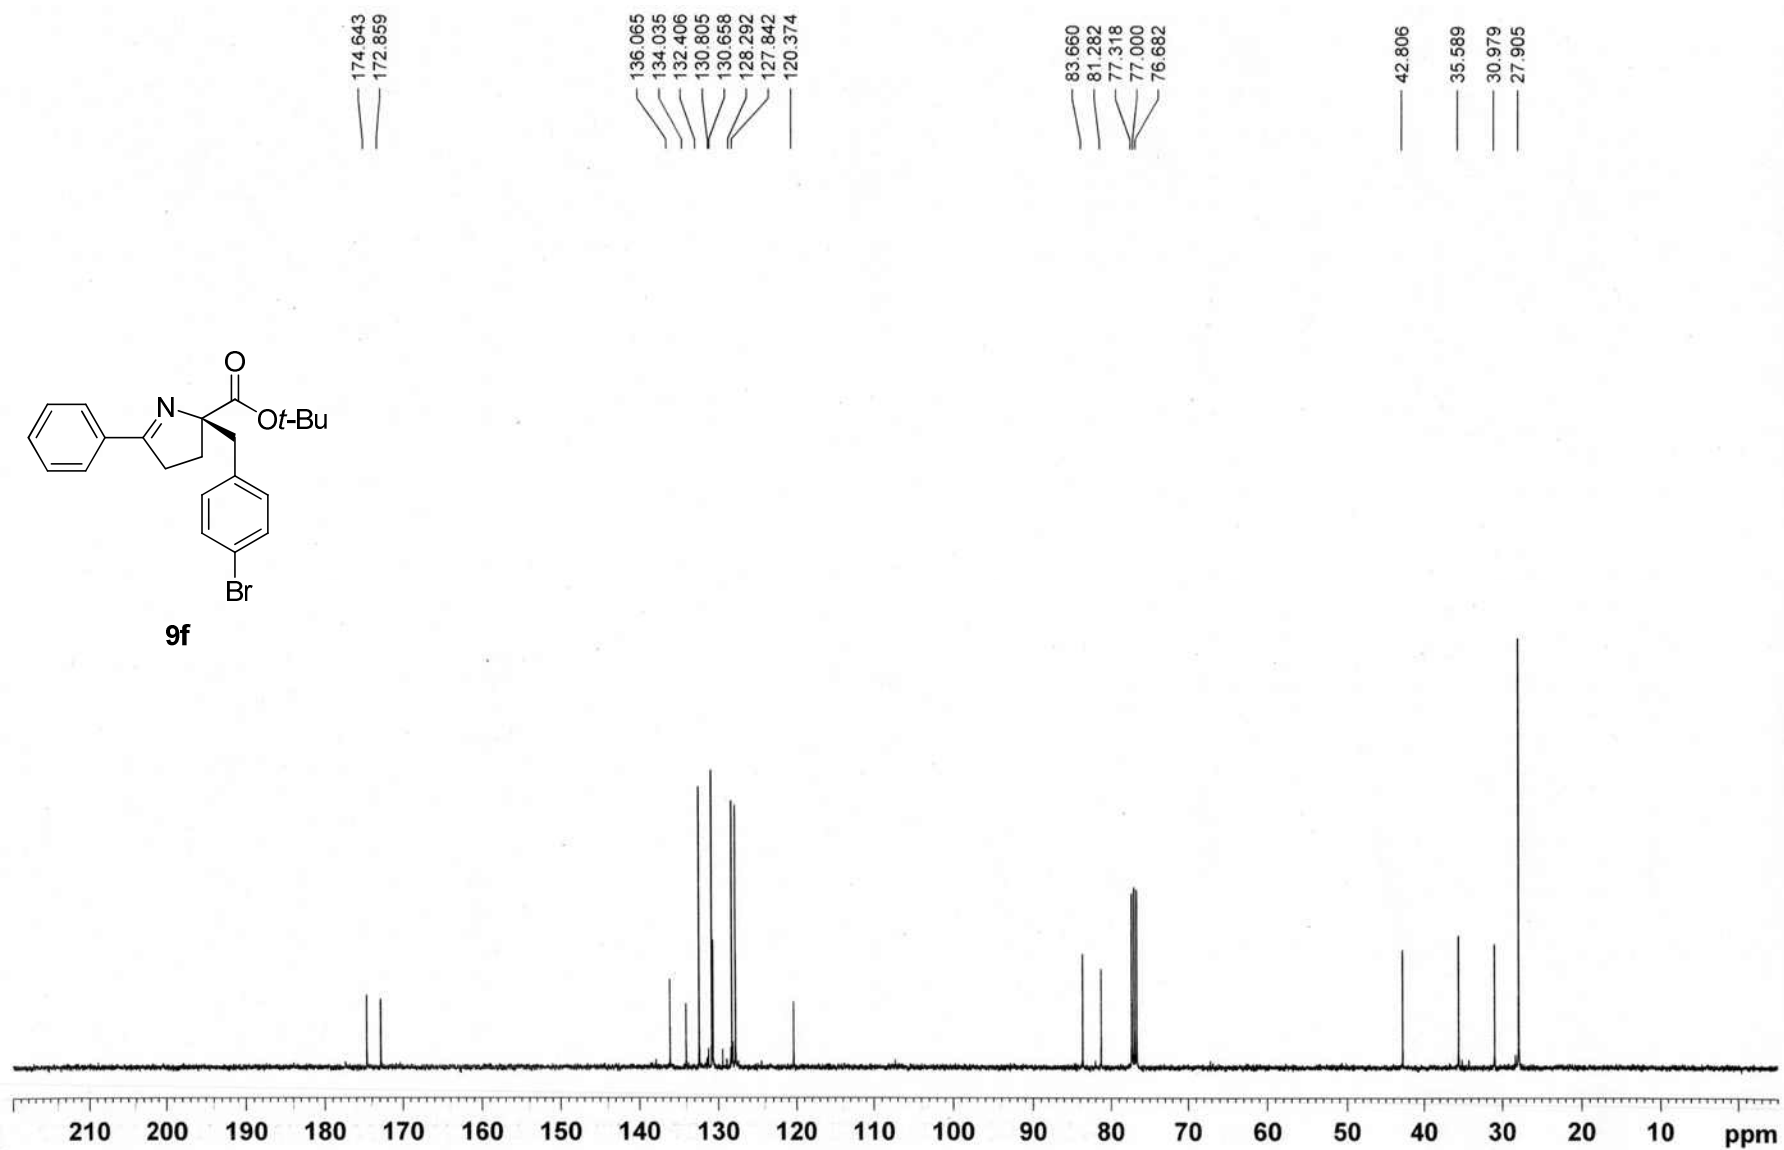

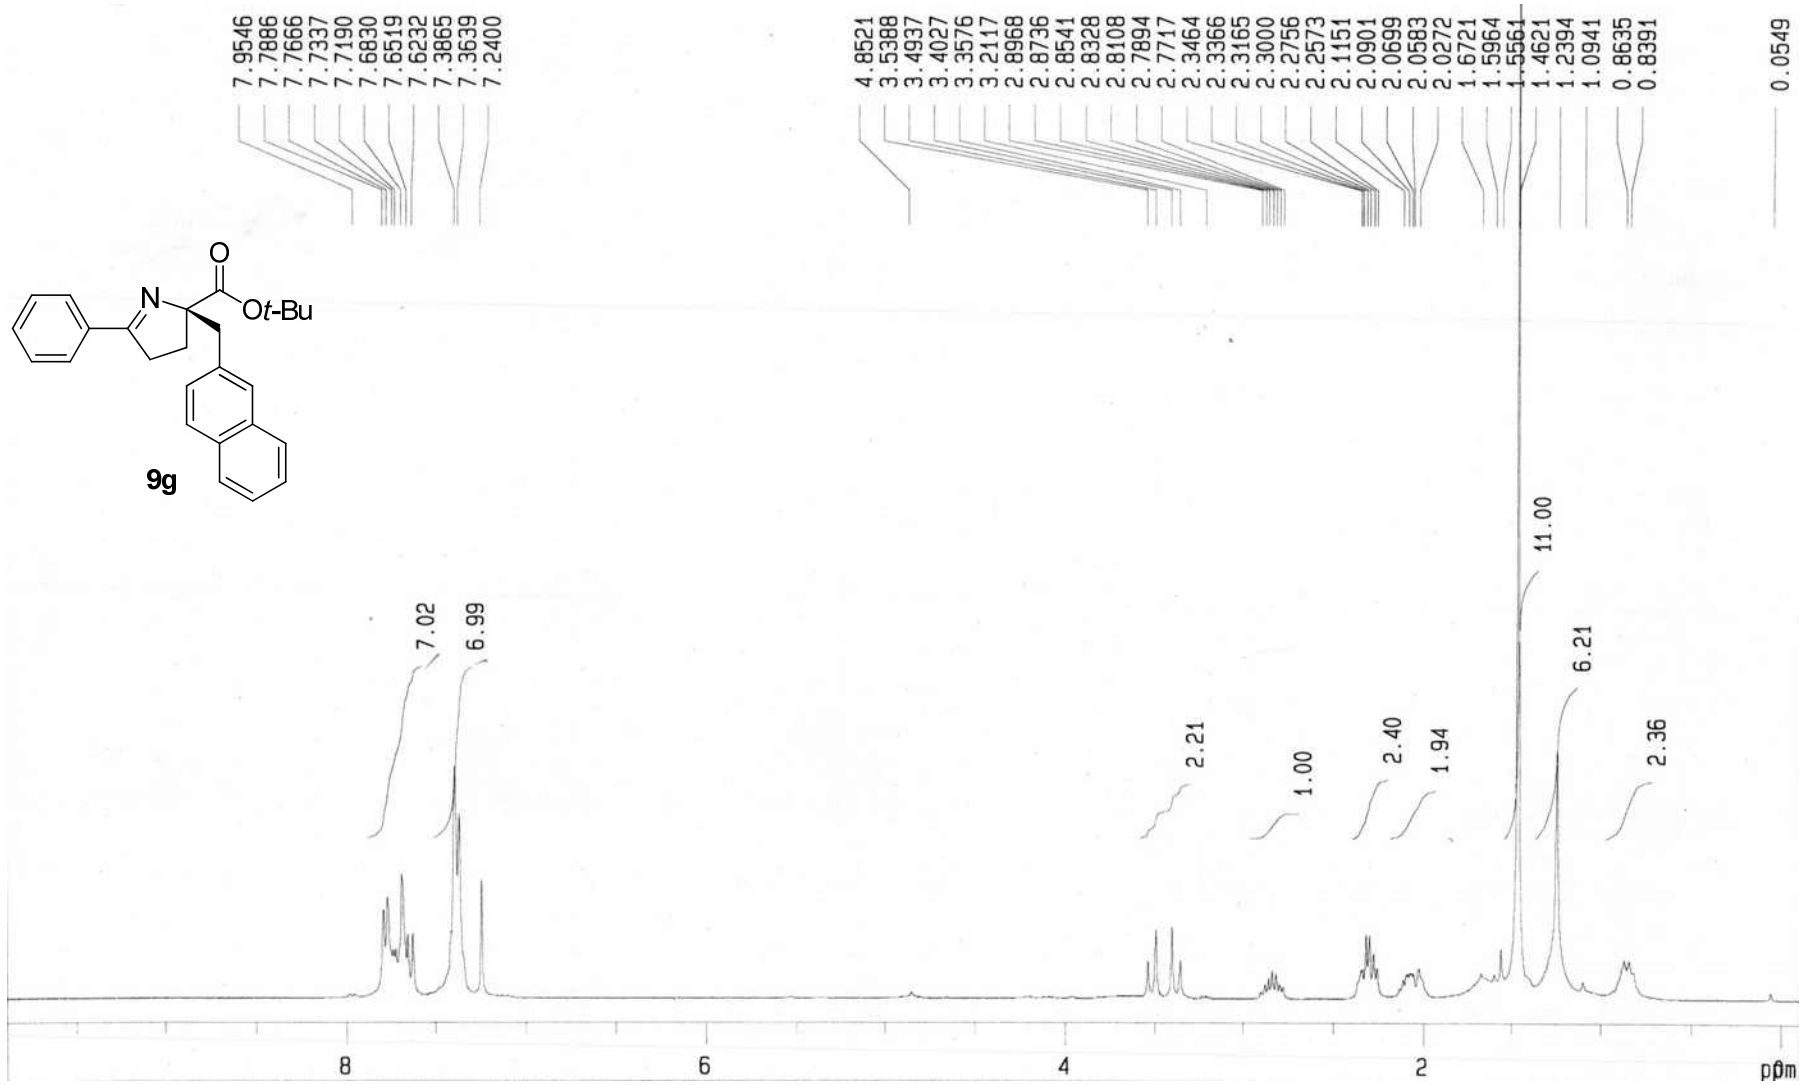

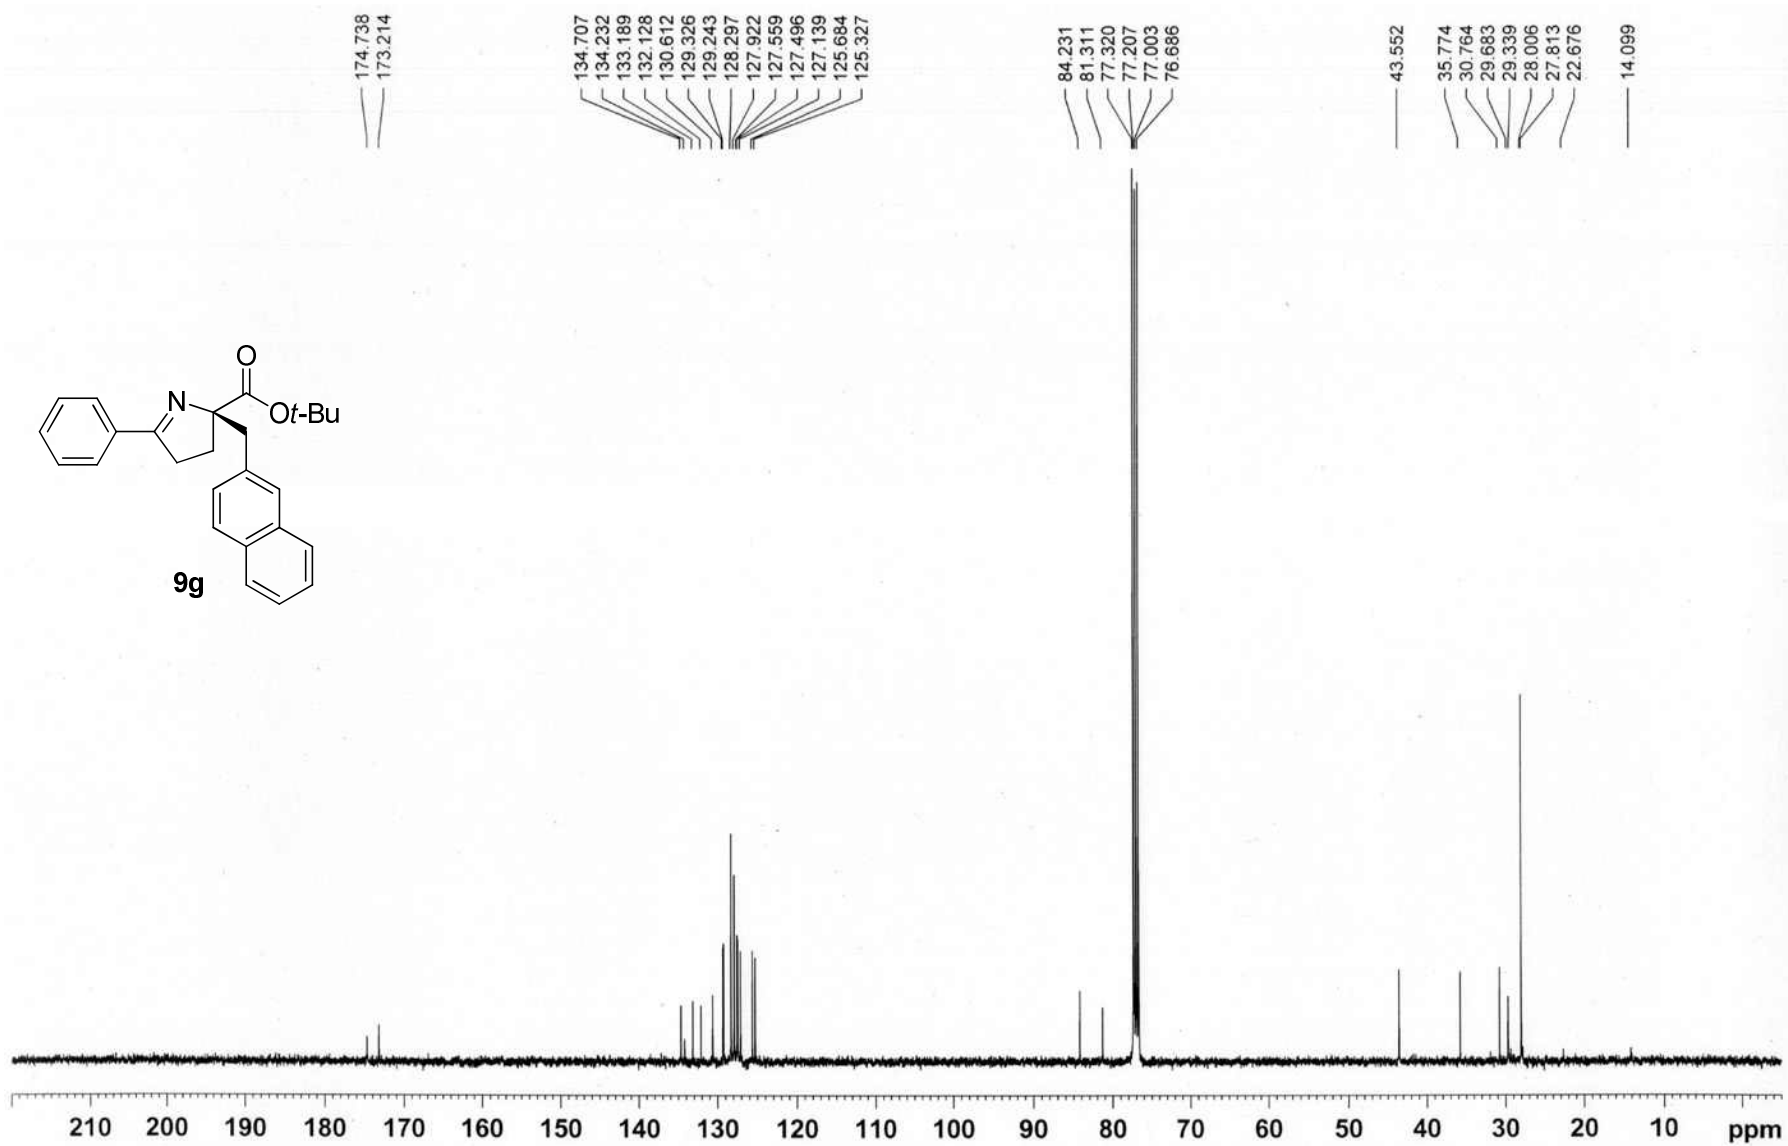

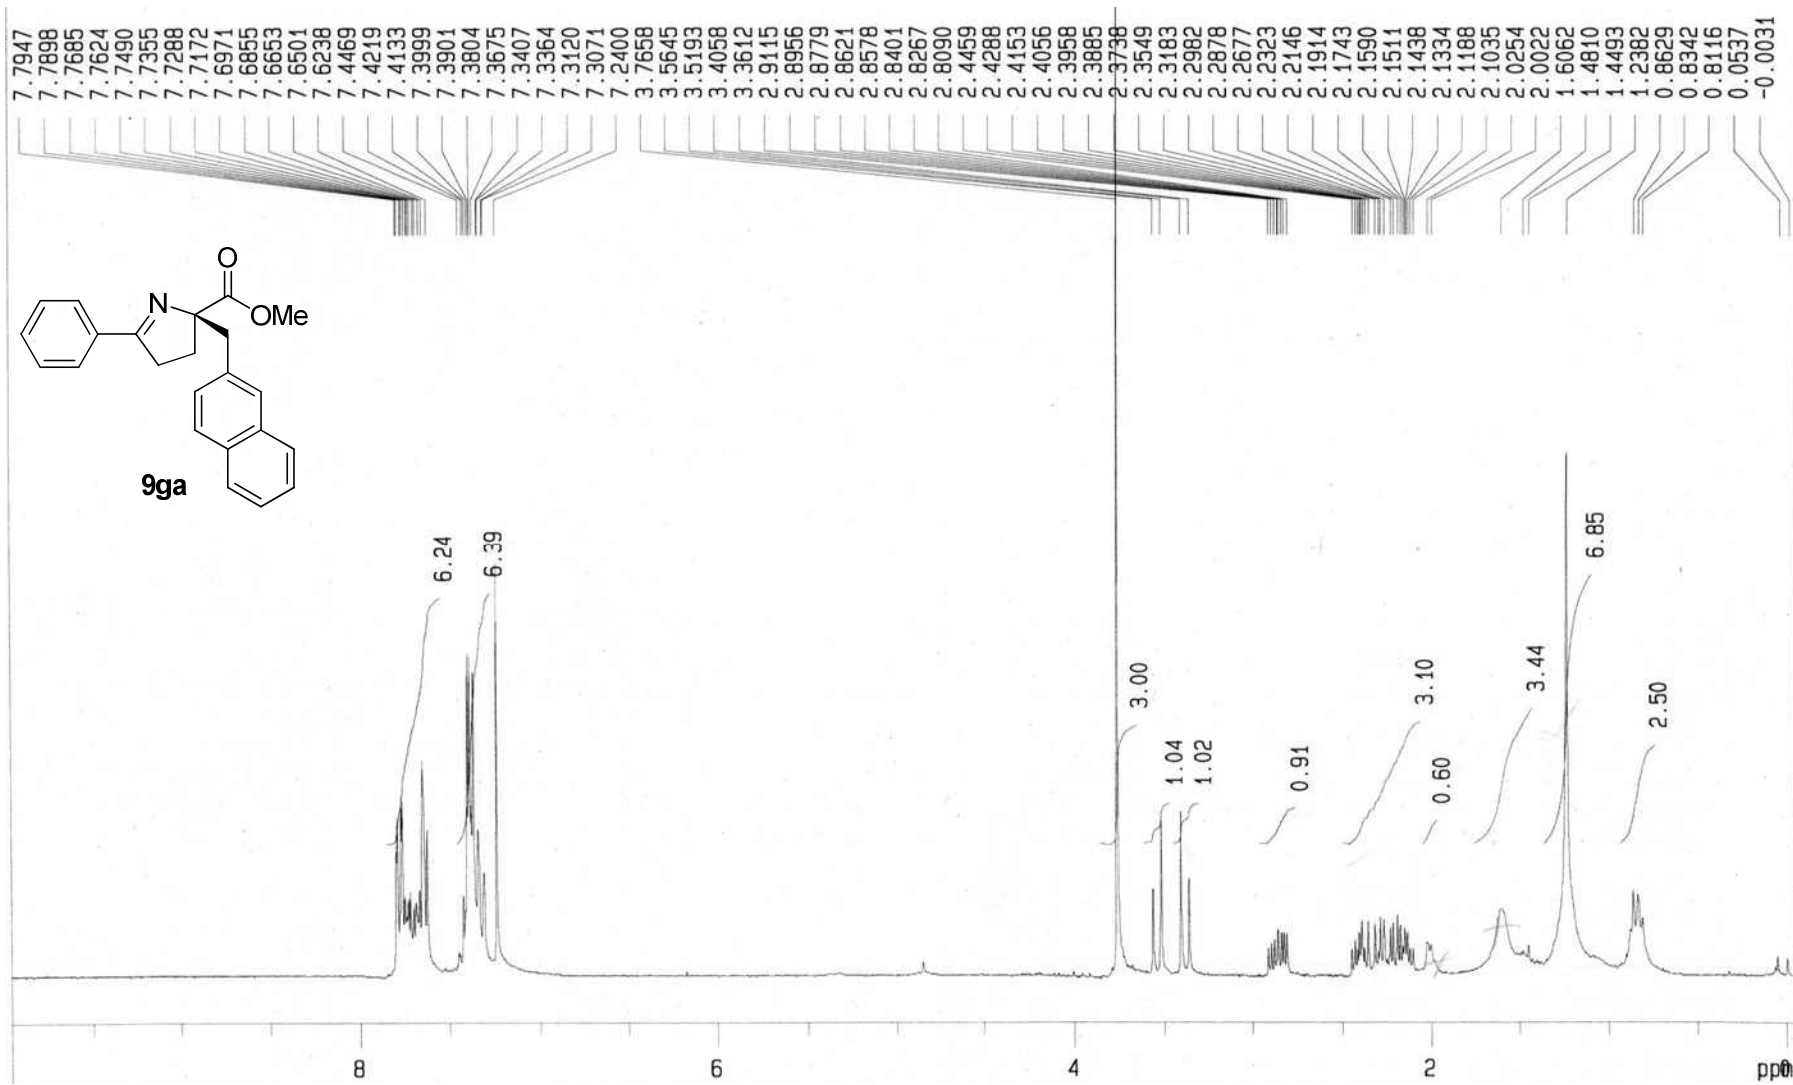

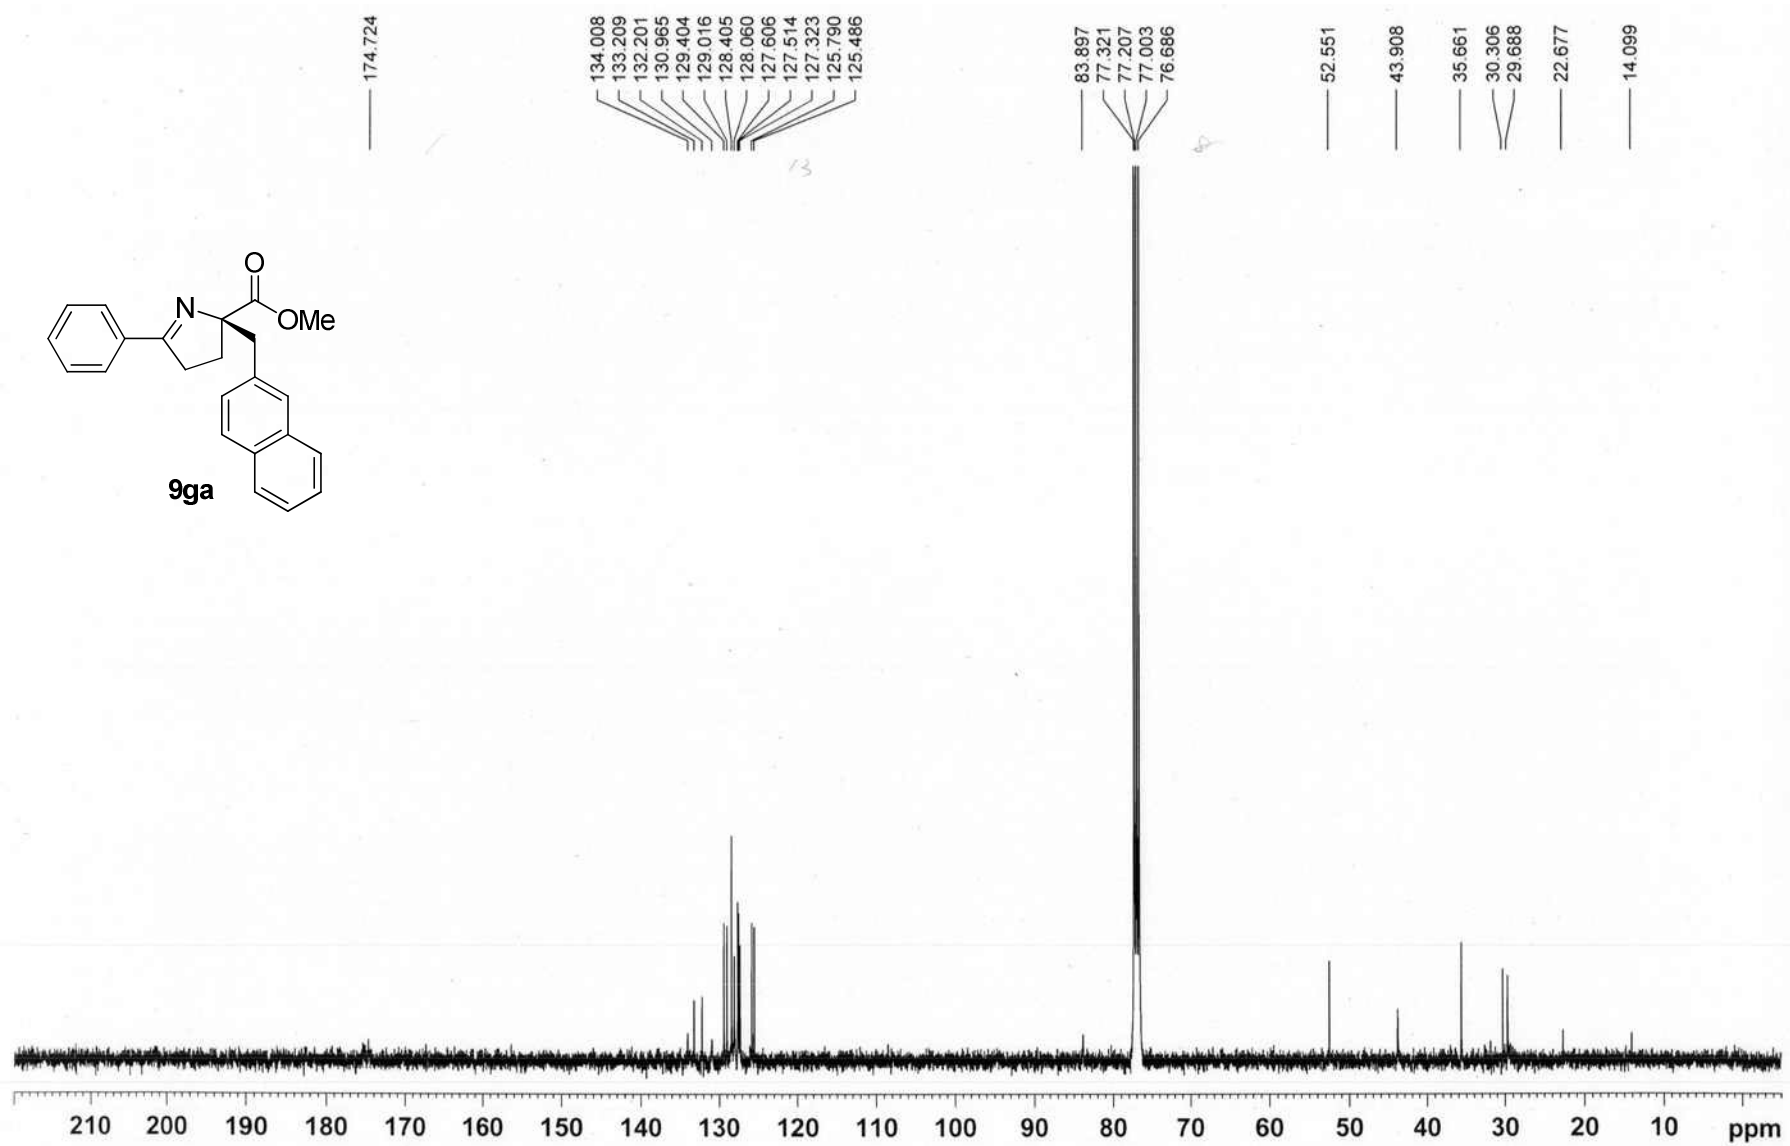

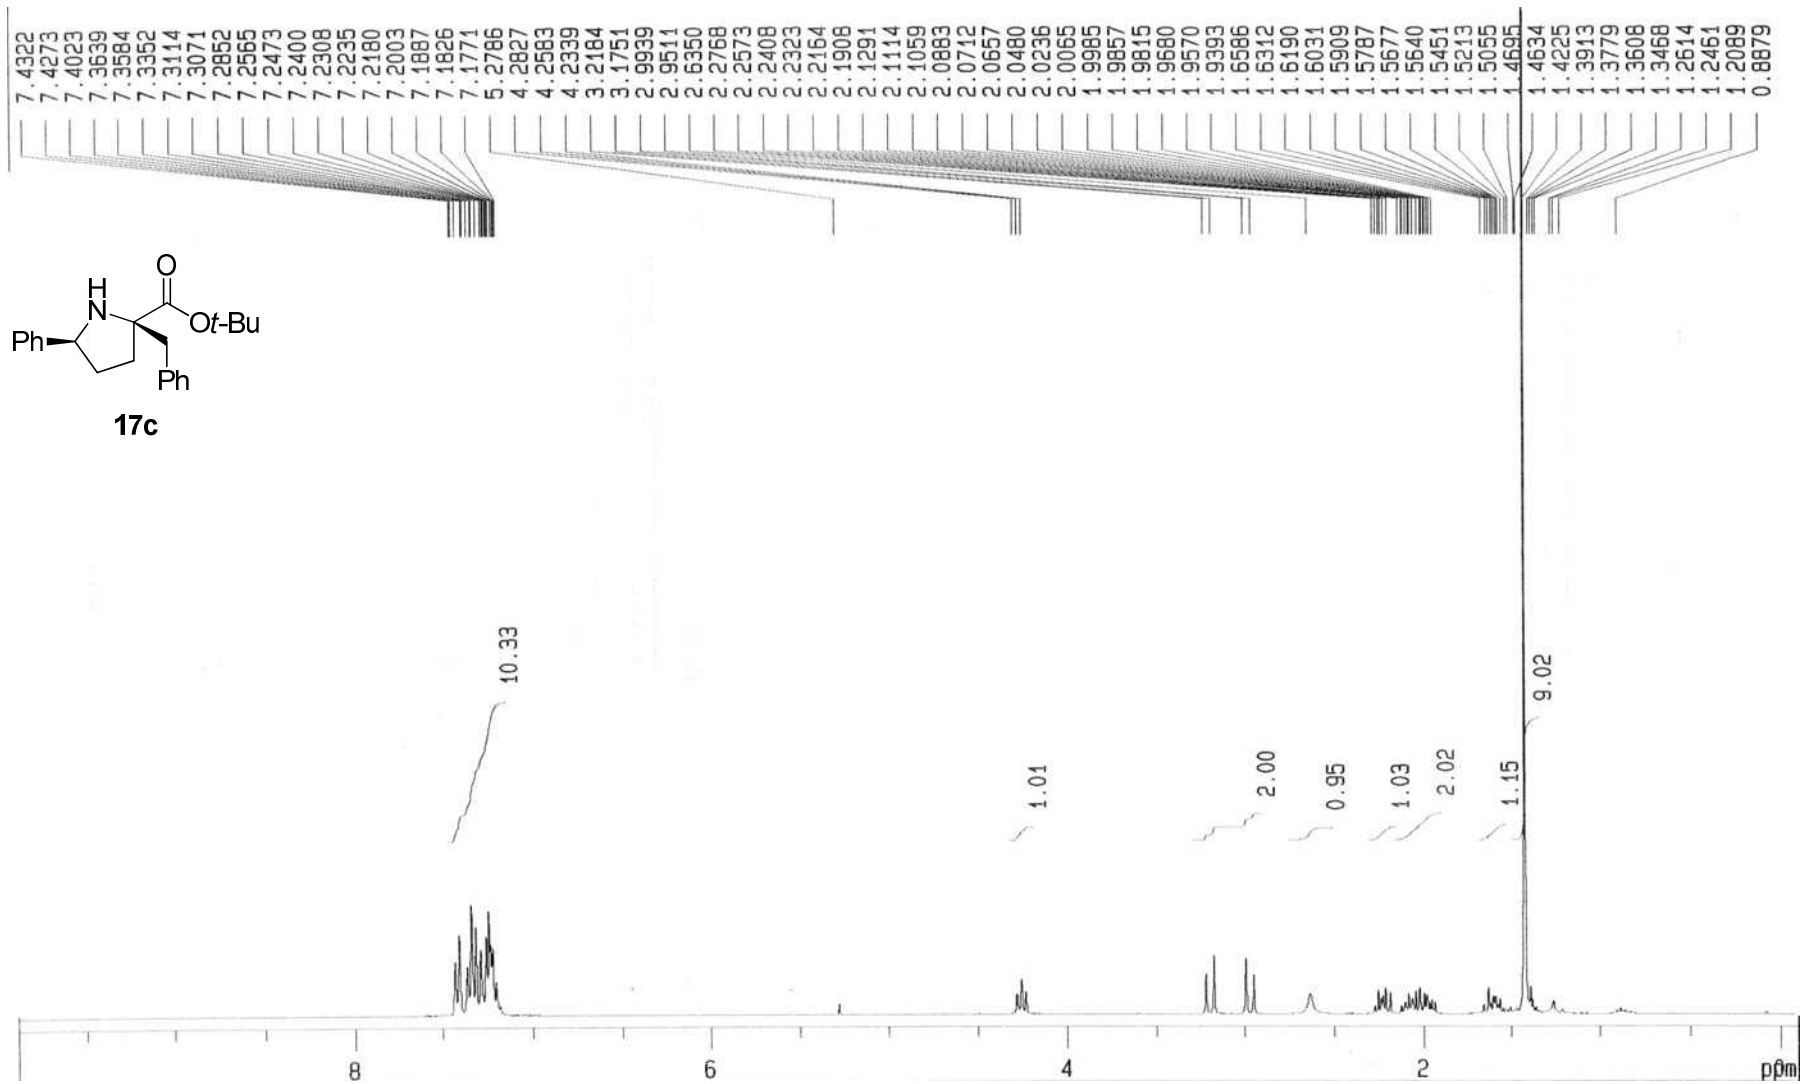

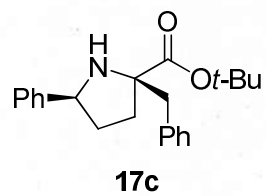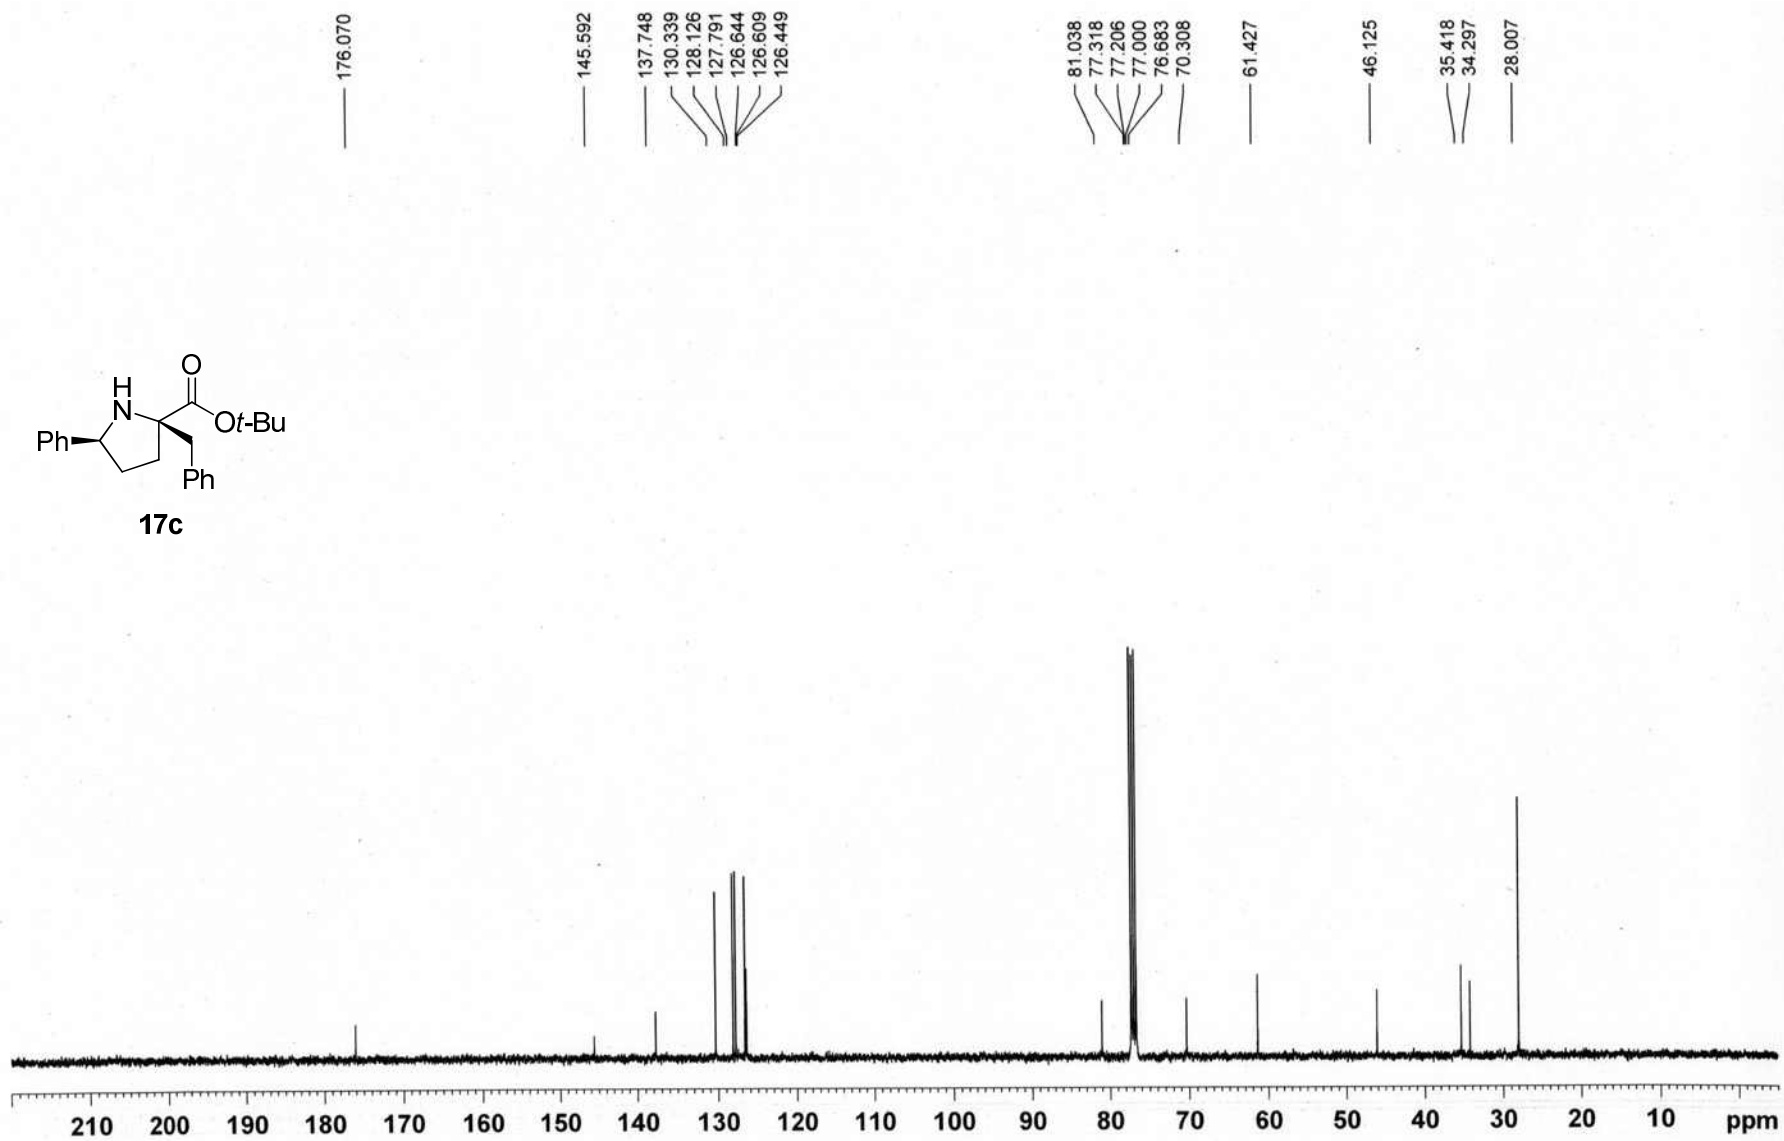

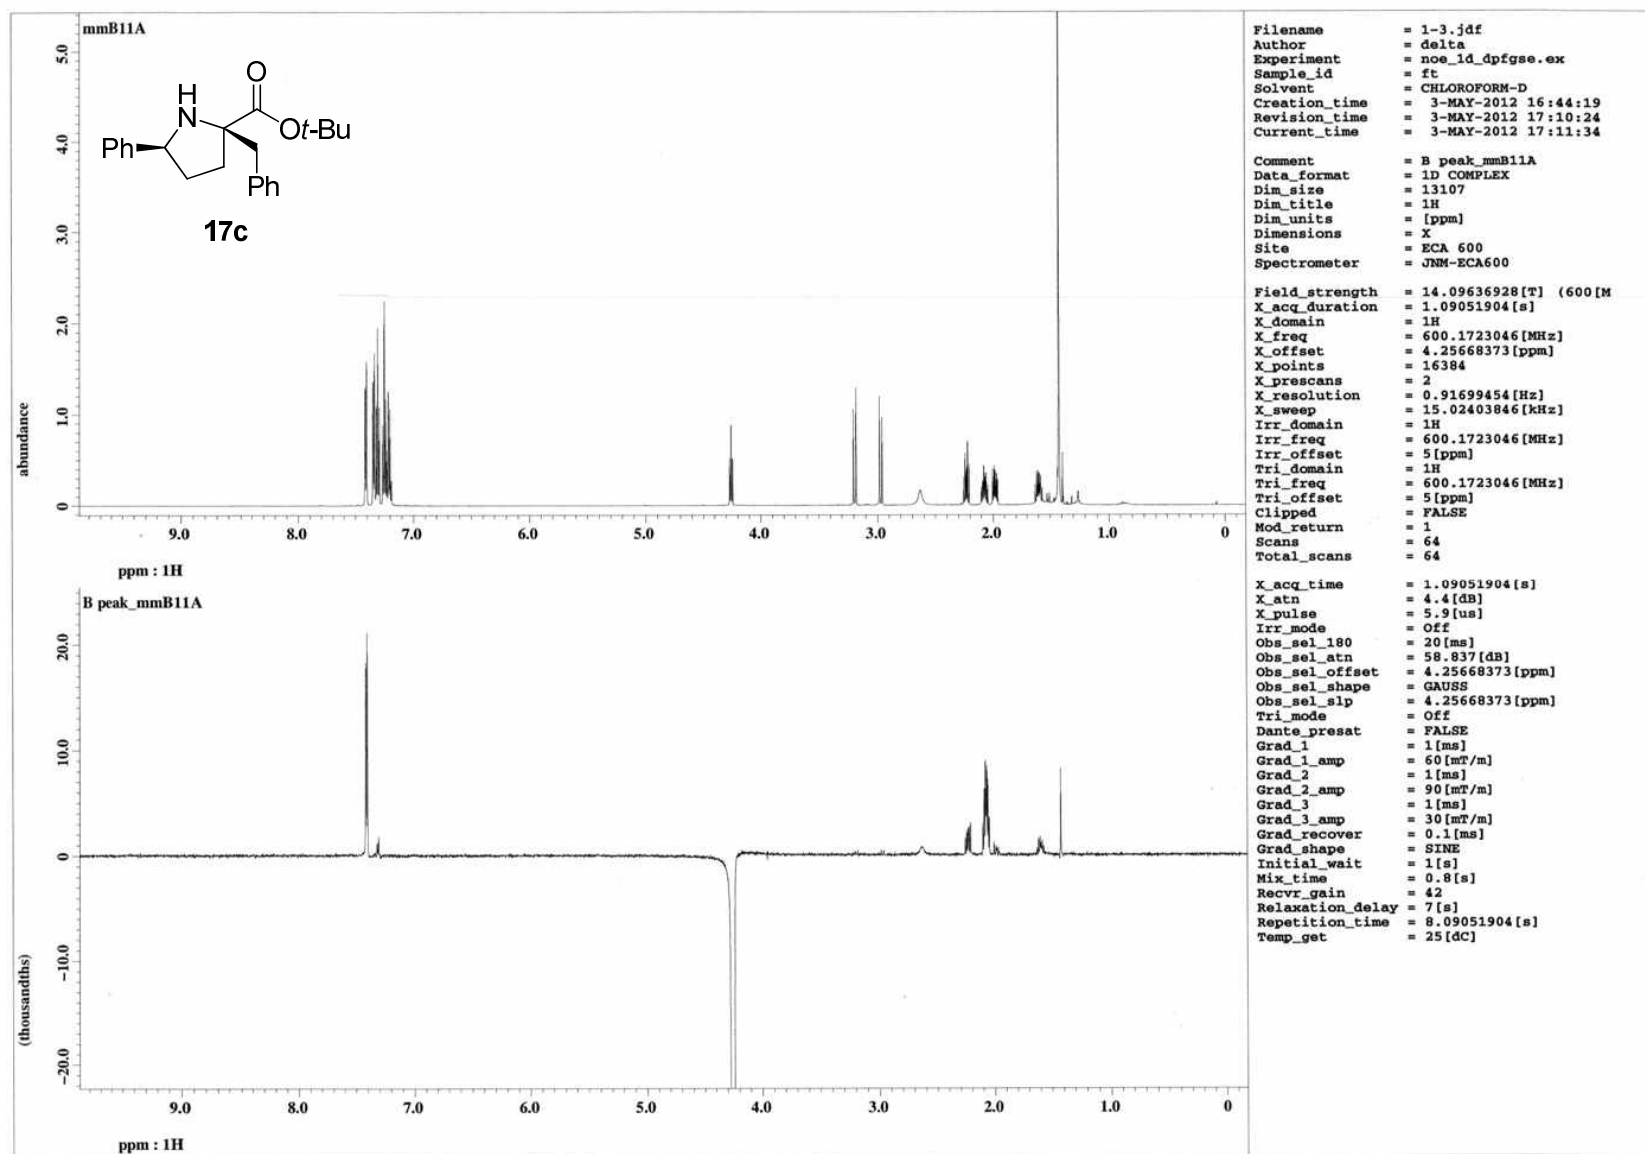



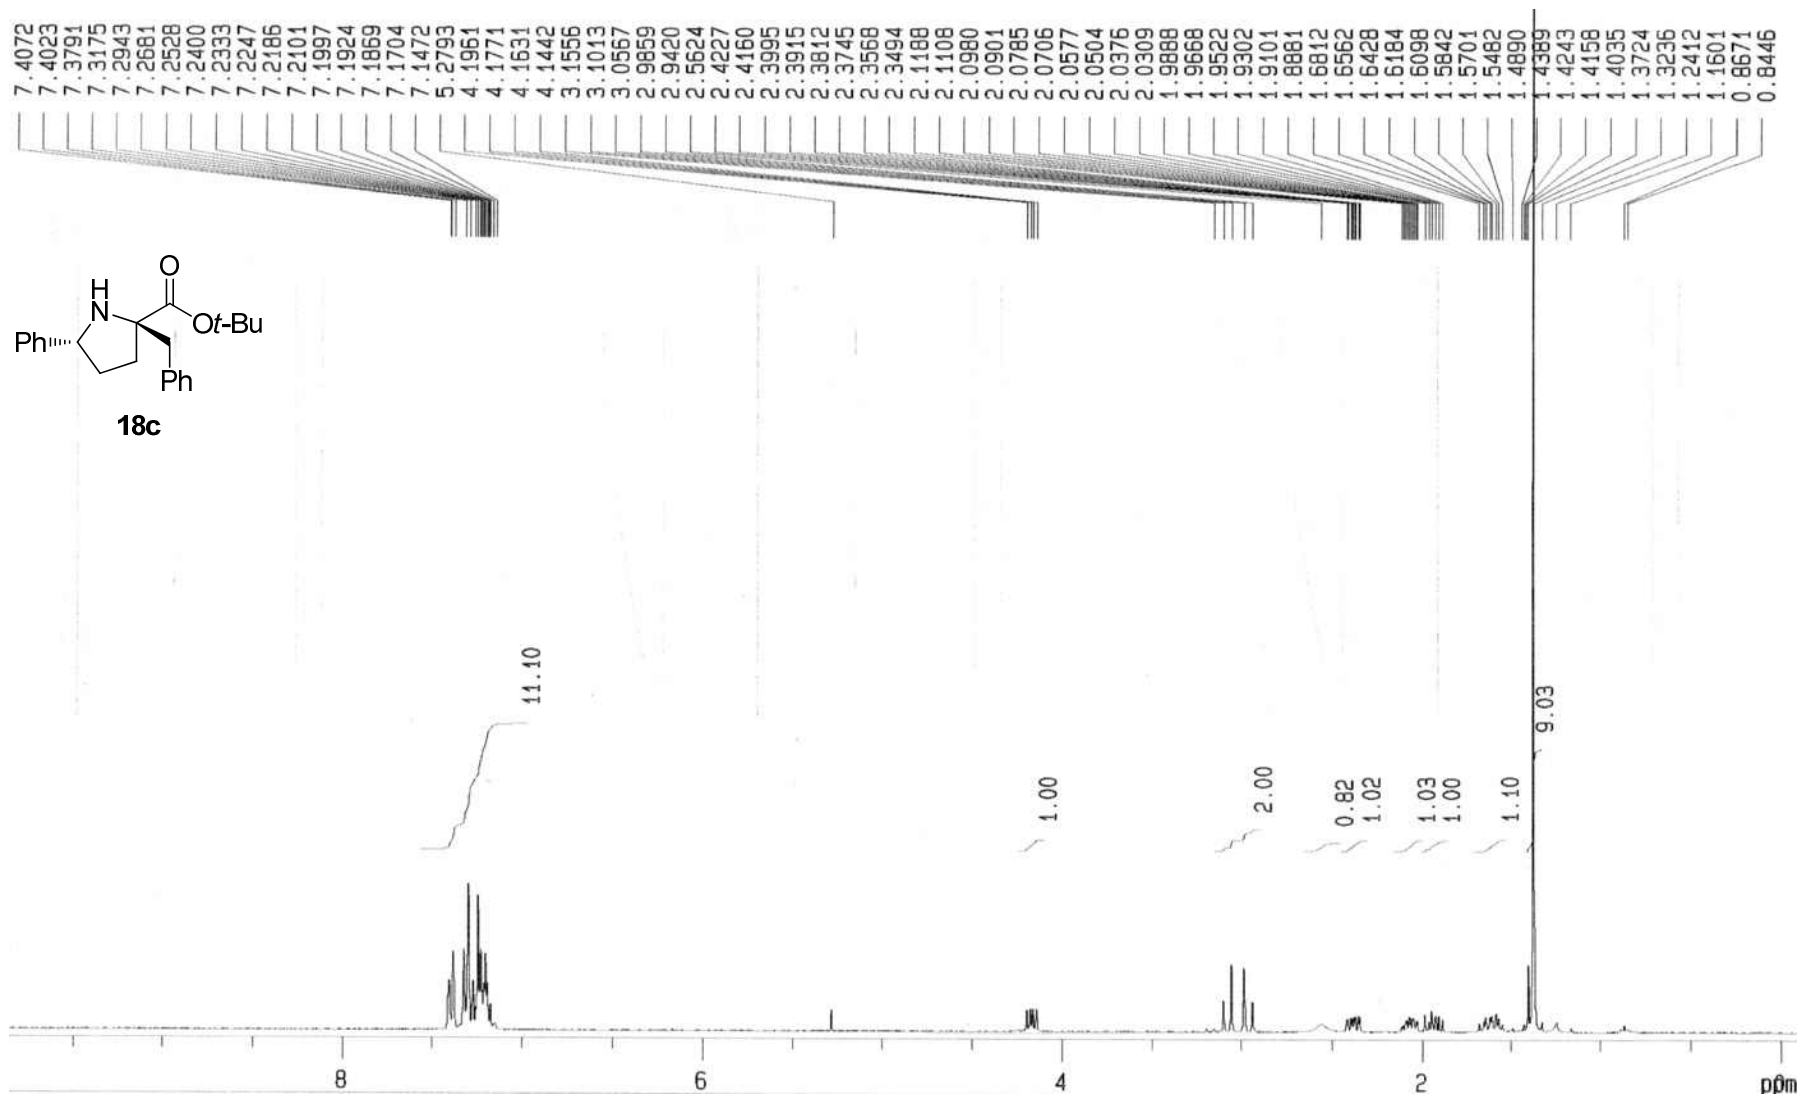

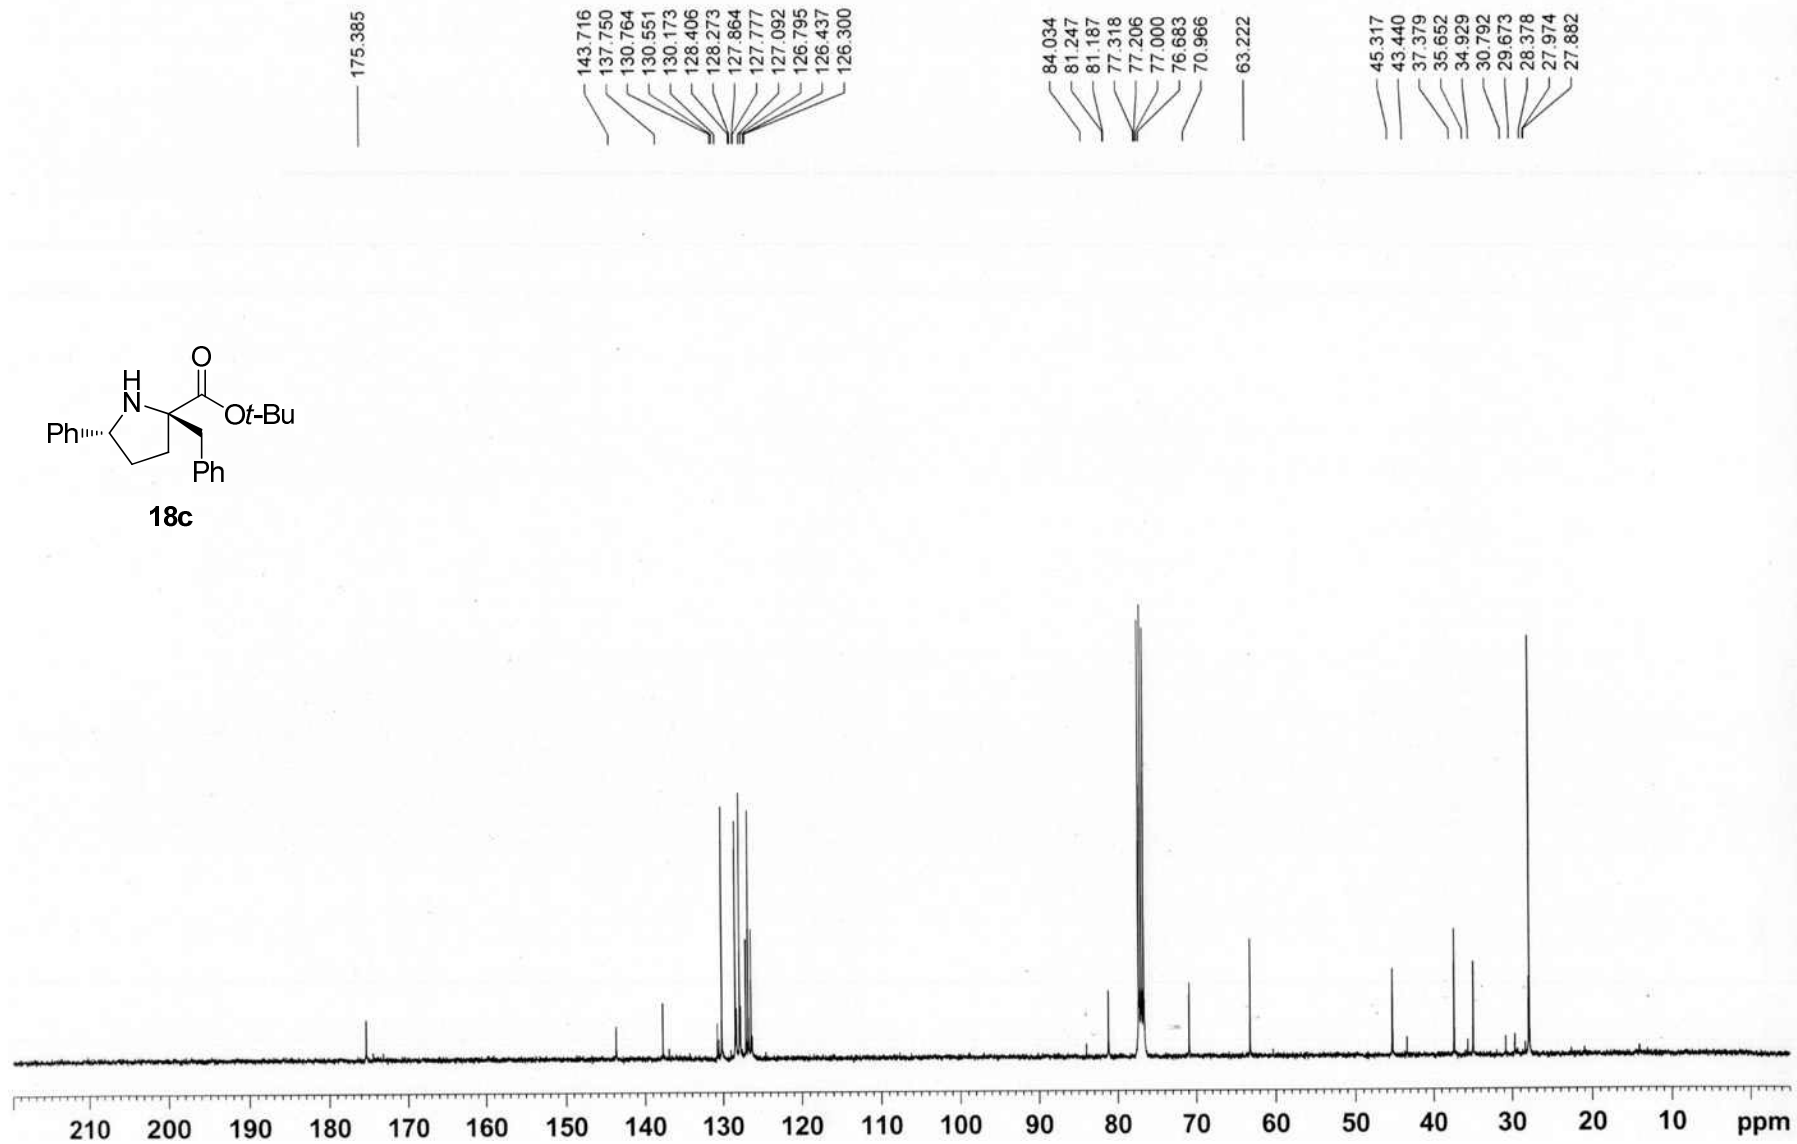

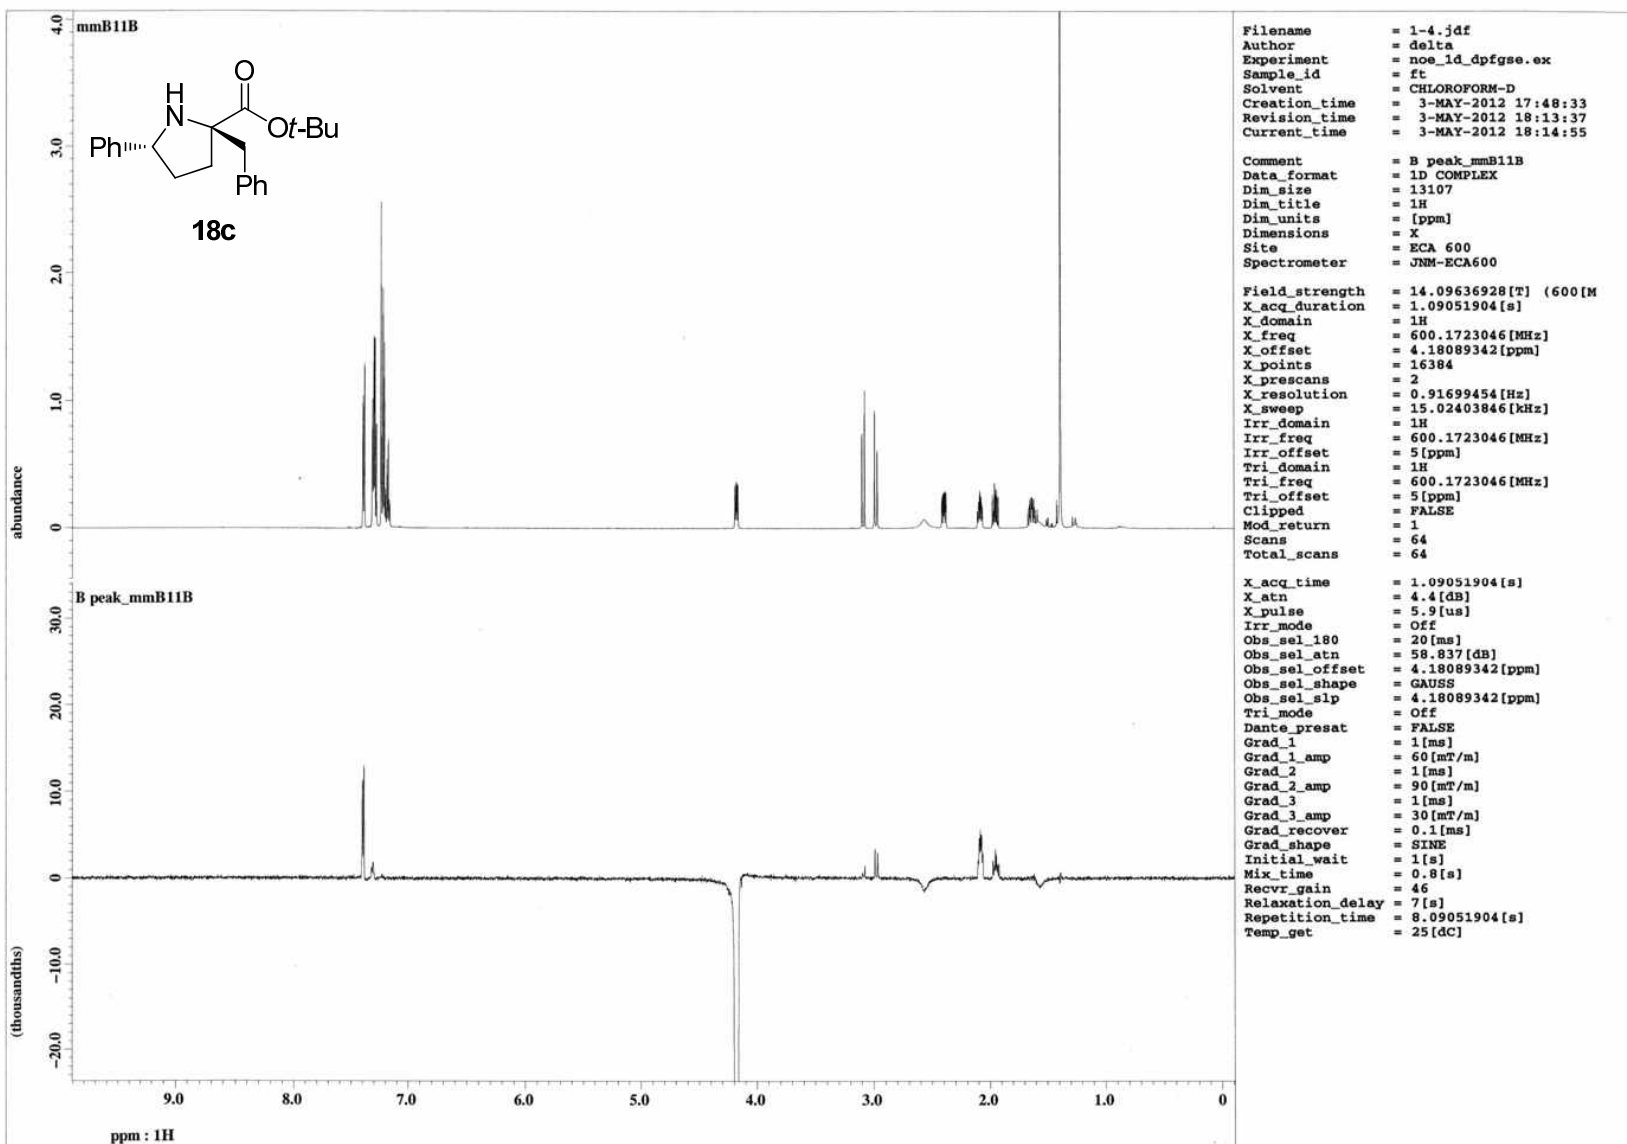

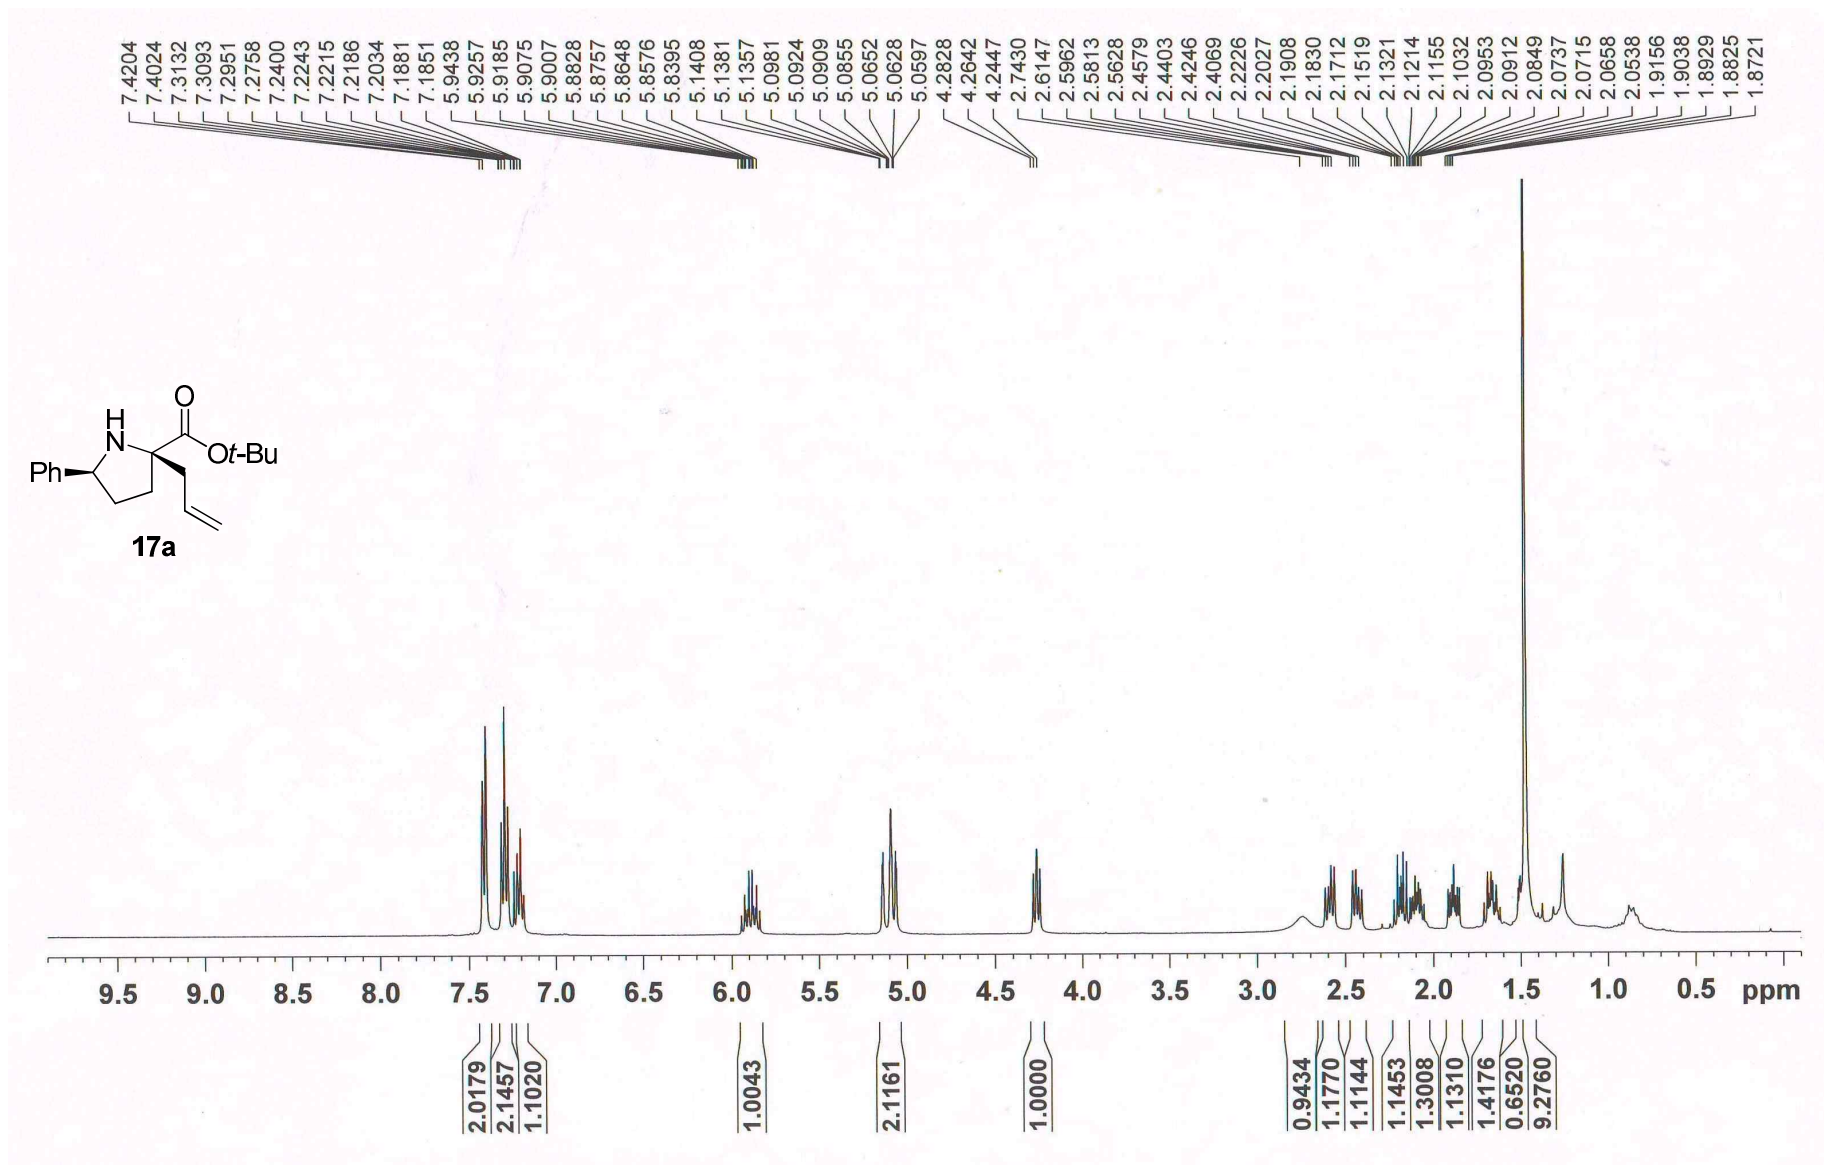

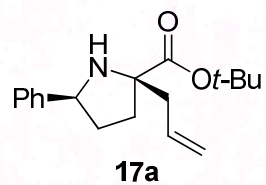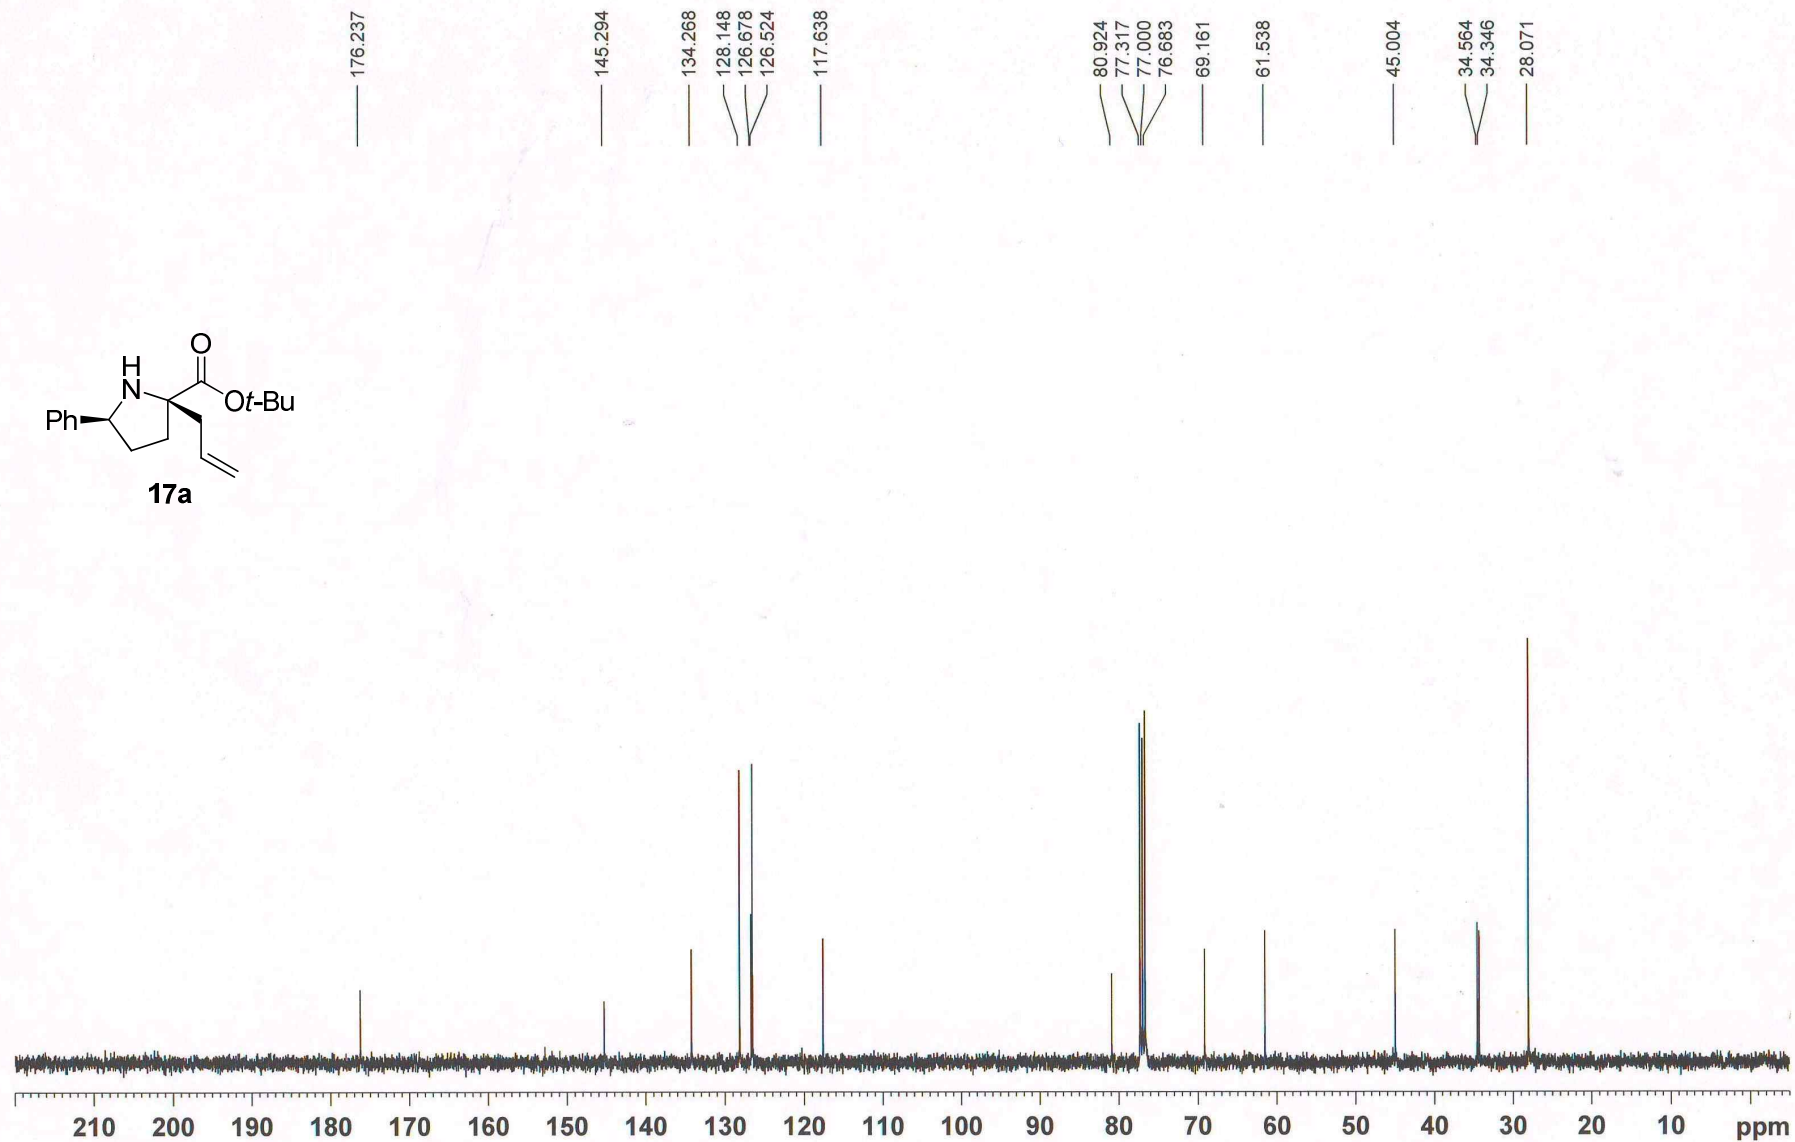

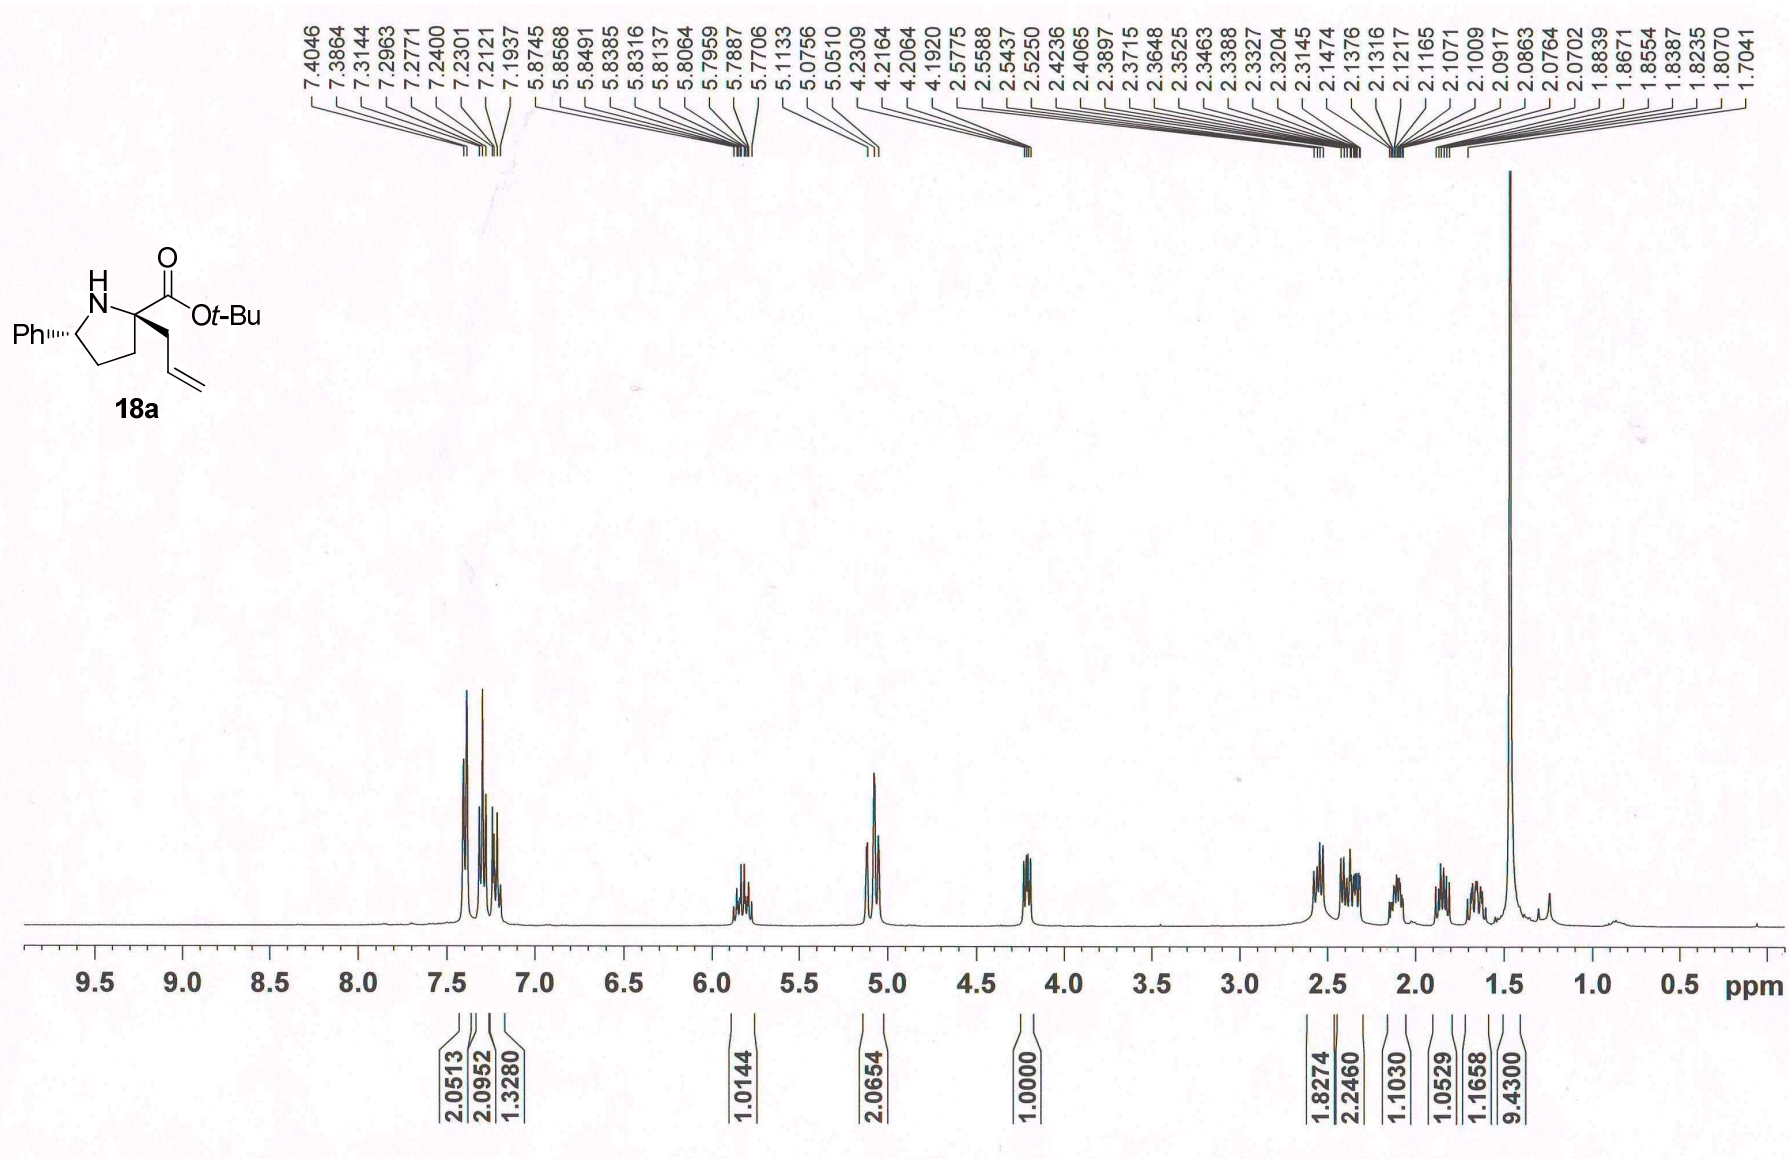

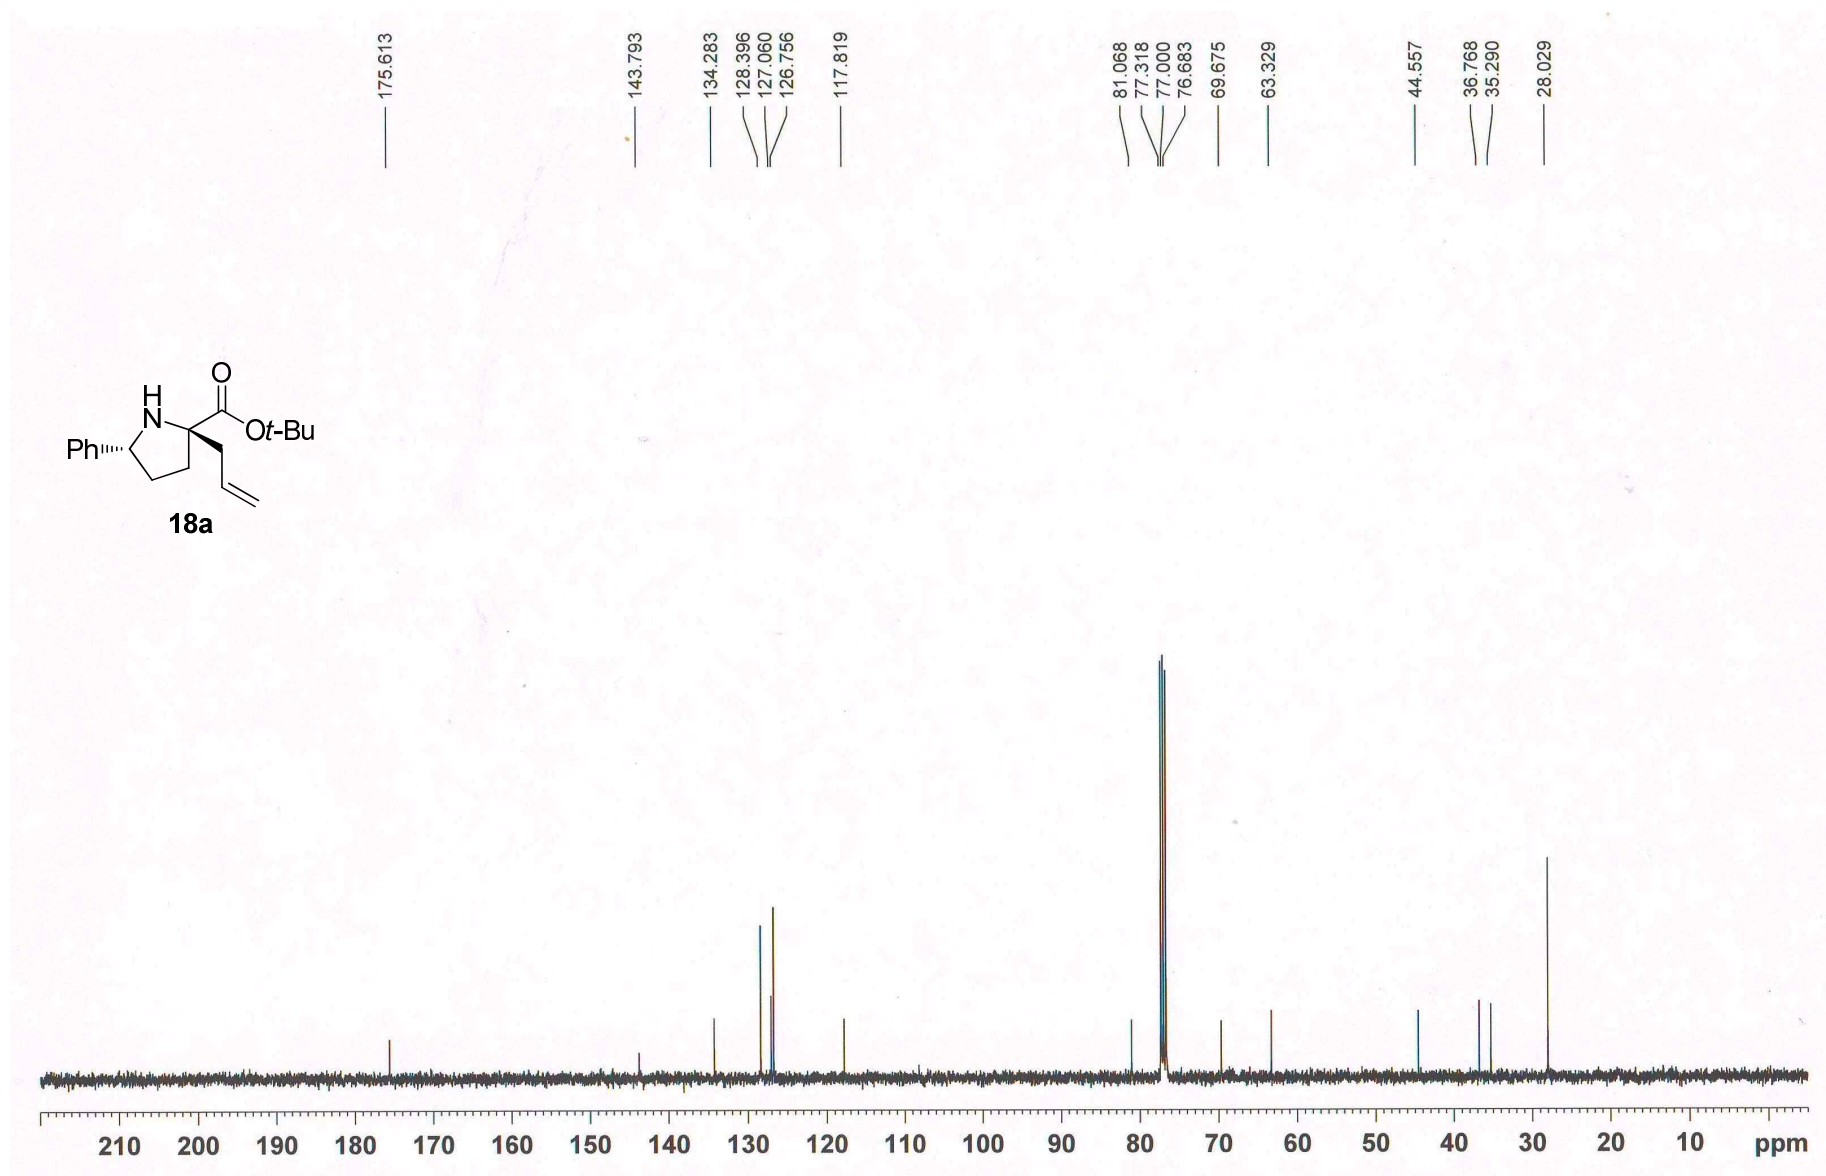

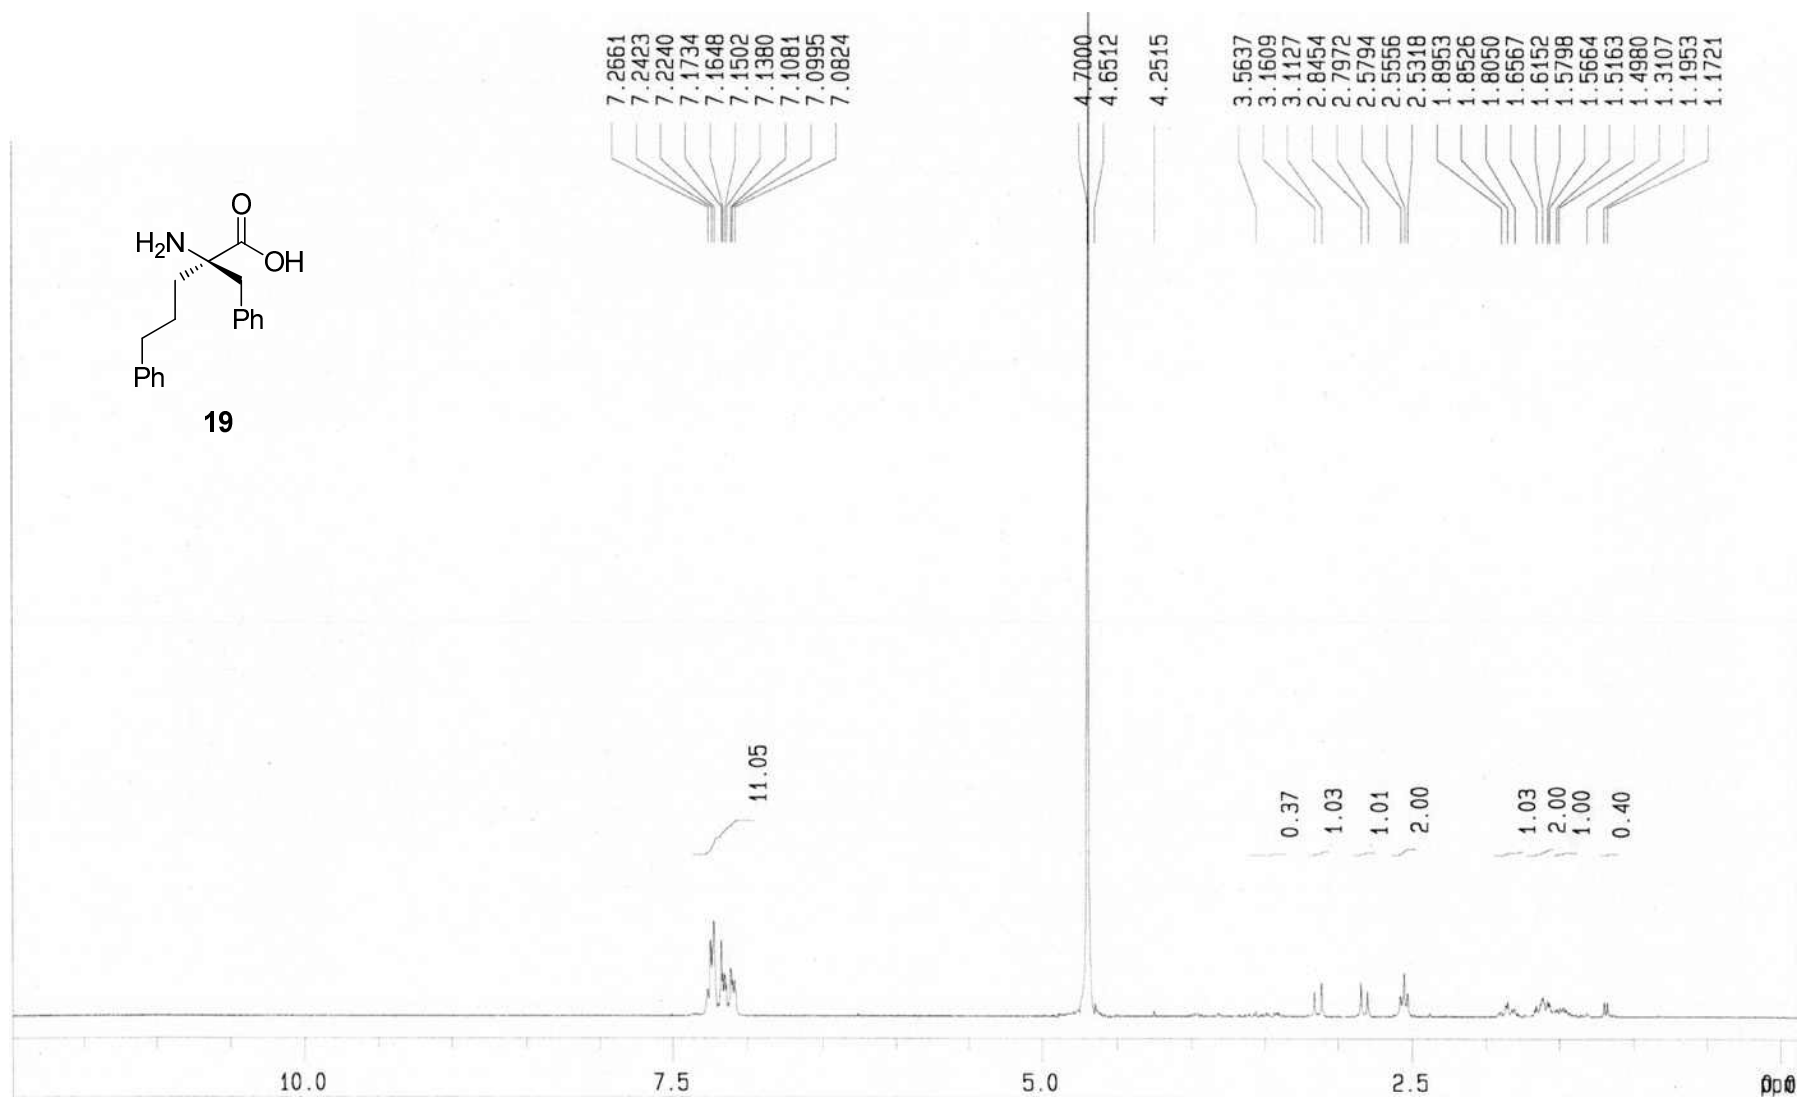



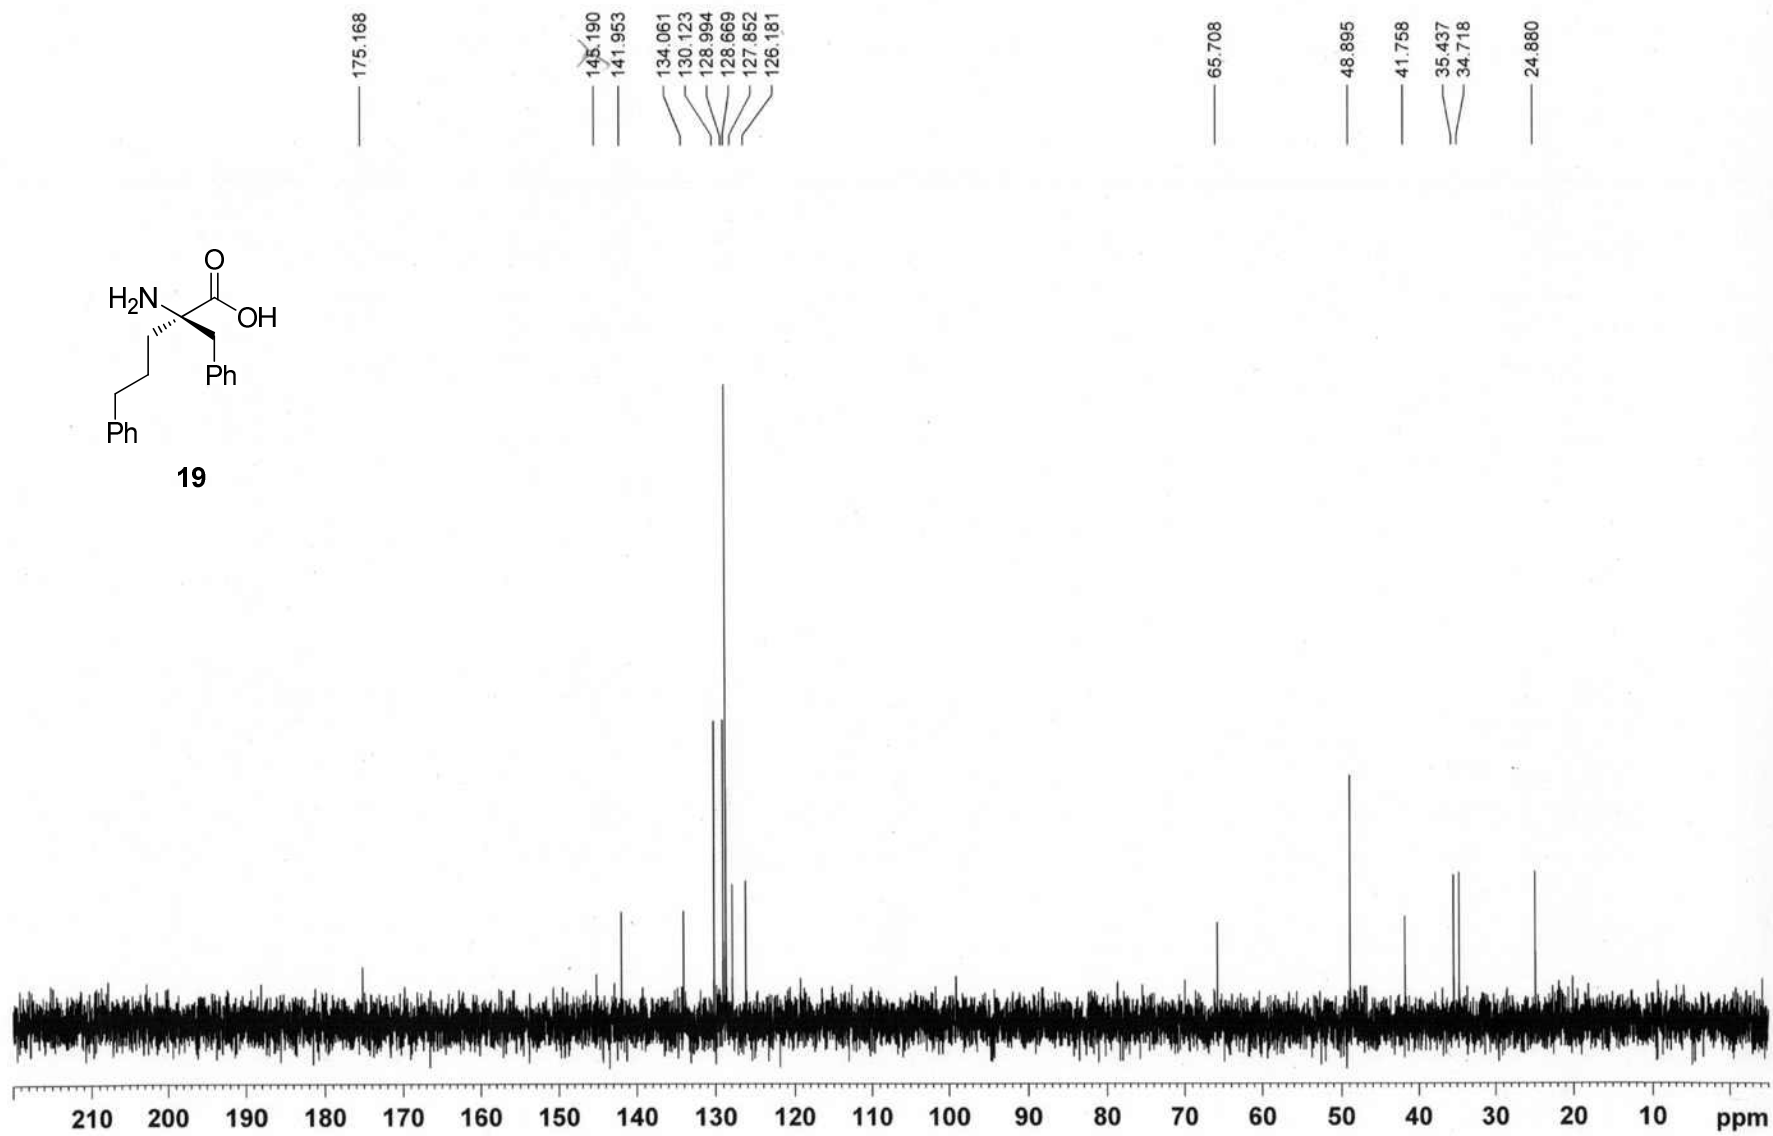

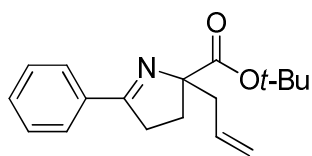

**9a**

### Area Percent Report

File: C:\EZChrom Elite\Enterprise\Projects\minu\MW 5-43 (racemate) AD-H 99 1 1flow 254nm 15 min

Sample ID: MW 5-43 (racemate)

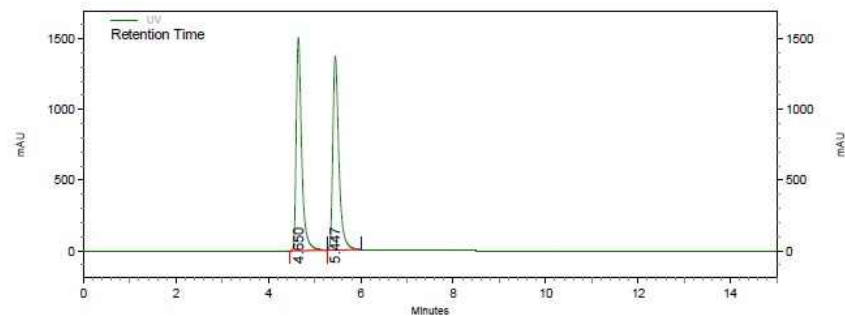

#### UV Results

| Name | Retention Time | Area     | Area Percent | Integration Codes |
|------|----------------|----------|--------------|-------------------|
| 1    | 4.650          | 49678477 | 49.953       | mm                |
| 2    | 5.447          | 49772100 | 50.047       | mm                |

|        |  |          |         |  |
|--------|--|----------|---------|--|
| Totals |  | 99450577 | 100.000 |  |
|--------|--|----------|---------|--|

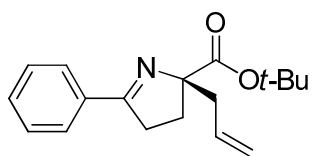

**9a**

### Area Percent Report

File: C:\EZChrom Elite\Enterprise\Projects\HSC\영주누나 샘플\HSC7-65 (AD-H 99 1 1flow 254nm 15min).dat

Sample ID: HSC7-65

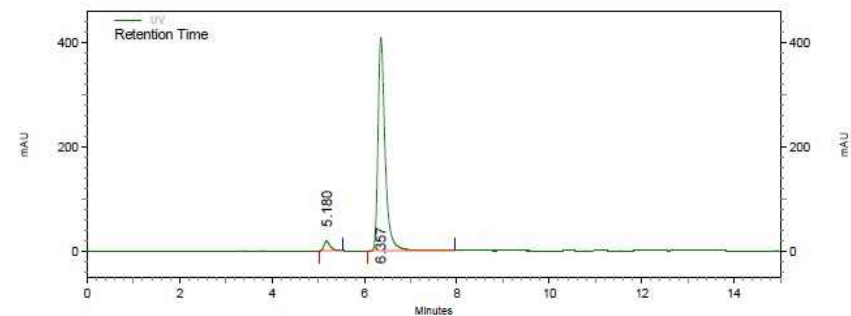

#### UV Results

| Name | Retention Time | Area     | Area Percent | Integration Codes |
|------|----------------|----------|--------------|-------------------|
| 1    | 5.180          | 679516   | 3.742        | BI                |
| 2    | 6.357          | 17477930 | 96.258       | BI                |

|        |  |          |         |  |
|--------|--|----------|---------|--|
| Totals |  | 18157446 | 100.000 |  |
|--------|--|----------|---------|--|

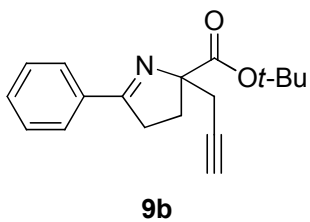

### Area Percent Report

Data File: C:\EZChrom Elite\Enterprise\Projects\EY\EY19(AD-H 99 1 1 254nm).dat

Sample ID: EY19 (9b, Propa)

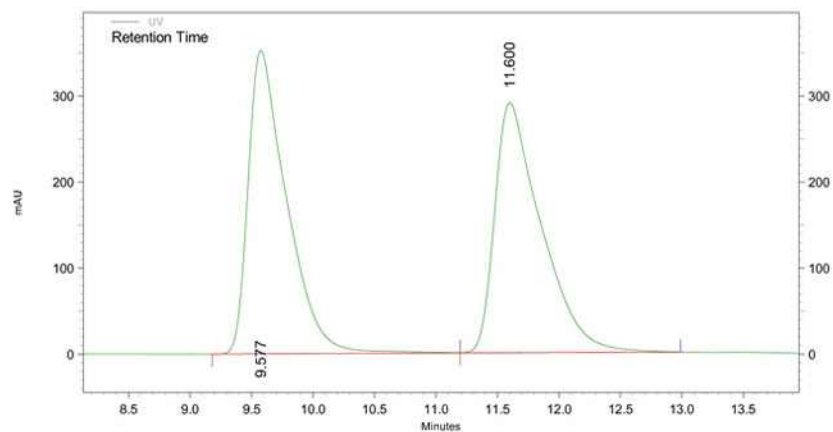

#### UV Results

| Name          | Retention Time | Area     | Area Percent | Integration Codes |
|---------------|----------------|----------|--------------|-------------------|
|               | 9.577          | 30673473 | 50.126       | BV                |
|               | 11.600         | 30519364 | 49.874       | VI                |
| <b>Totals</b> |                |          |              |                   |
|               |                | 61192837 | 100.000      |                   |

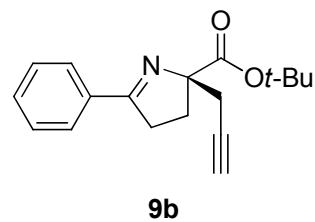

### Area Percent Report

Data File: C:\EZChrom Elite\Enterprise\Projects\EY\EY38(AD-H 99 1 1 254nm).dat

Sample ID: EY38 (9b, Propa)

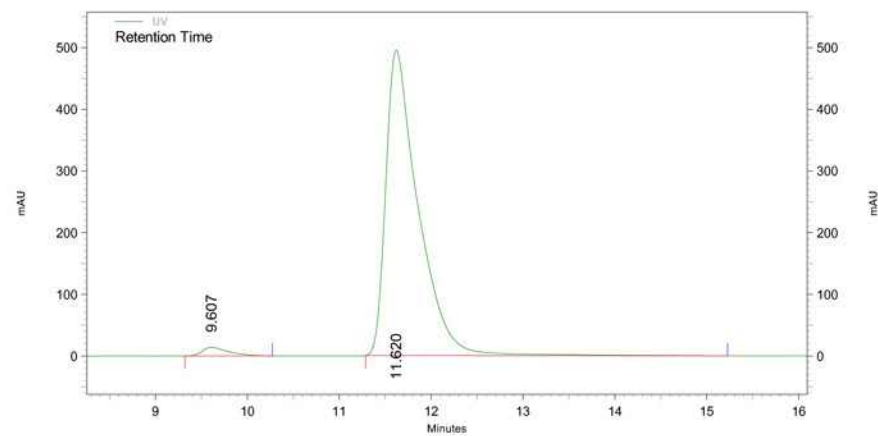

#### UV Results

| Name          | Retention Time | Area     | Area Percent | Integration Codes |
|---------------|----------------|----------|--------------|-------------------|
|               | 9.607          | 1101186  | 2.218        | II                |
|               | 11.620         | 48549552 | 97.782       | II                |
| <b>Totals</b> |                |          |              |                   |
|               |                | 49650738 | 100.000      |                   |

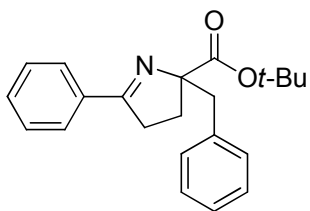

9c

### Area Percent Report

Data File: C:\EZChrom Elite\Enterprise\Projects\YJYJ167 002.dat

Sample ID: YJ167 (9c, Bn)

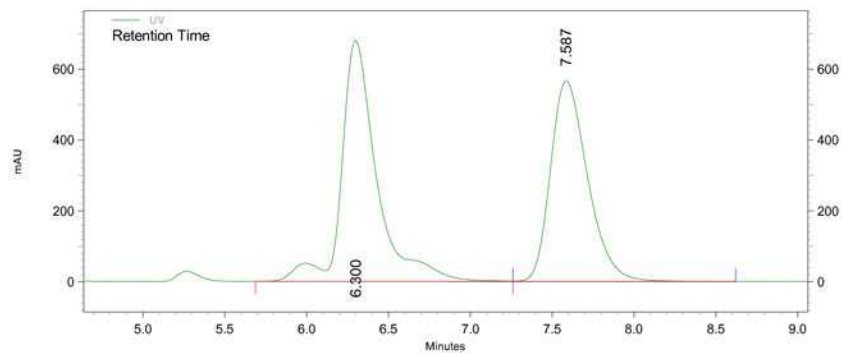

#### UV Results

| Name | Retention Time | Area     | Area Percent | Integration Codes |
|------|----------------|----------|--------------|-------------------|
|      | 6.300          | 40780407 | 53.390       | IV                |
|      | 7.587          | 35602280 | 46.610       | VI                |

|        |  |          |         |  |
|--------|--|----------|---------|--|
| Totals |  | 76382687 | 100.000 |  |
|--------|--|----------|---------|--|

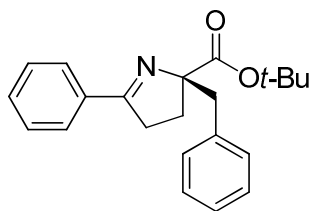

9c

### Area Percent Report

Data File: C:\EZChrom Elite\Enterprise\Projects\YJYJ 171 002.dat

Sample ID: YJ171 (9c, Bn)

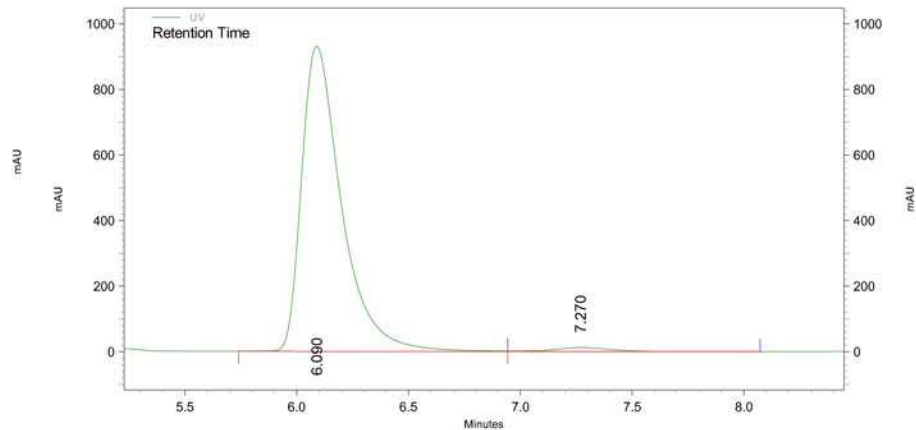

#### UV Results

| Name | Retention Time | Area     | Area Percent | Integration Codes |
|------|----------------|----------|--------------|-------------------|
|      | 6.090          | 46205068 | 98.235       | IV                |
|      | 7.270          | 829934   | 1.765        | VB                |

|        |  |          |         |  |
|--------|--|----------|---------|--|
| Totals |  | 47035002 | 100.000 |  |
|--------|--|----------|---------|--|

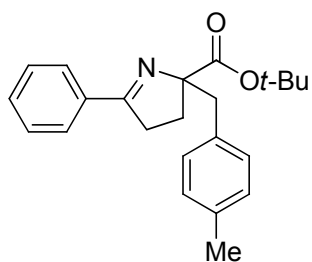

**9d**

### Area Percent Report

Data File: C:\EZChrom Elite\Enterprise\Projects\EY\EY22(AD-H 99 1 1 254nm).dat

Sample ID: EY22 (9d, 4-Me)

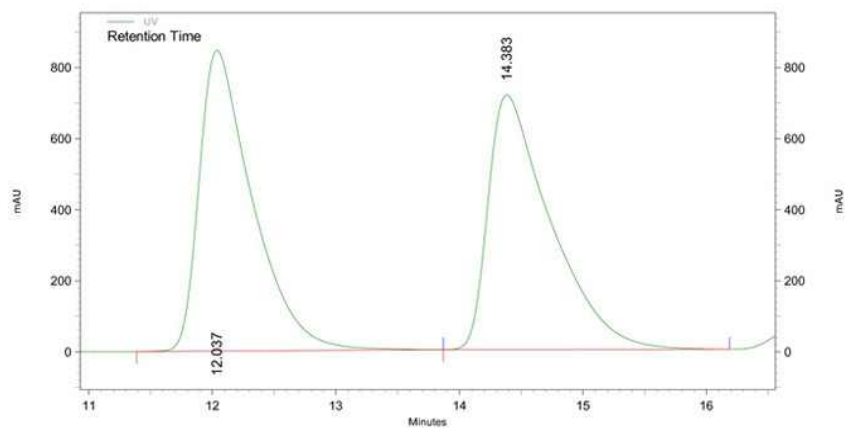

#### UV Results

| Name | Retention Time | Area      | Area Percent | Integration Codes |
|------|----------------|-----------|--------------|-------------------|
|      | 12.037         | 101490806 | 50.183       | IB                |
|      | 14.383         | 100750610 | 49.817       | BI                |

|        |  |           |         |  |
|--------|--|-----------|---------|--|
| Totals |  | 202241416 | 100.000 |  |
|--------|--|-----------|---------|--|

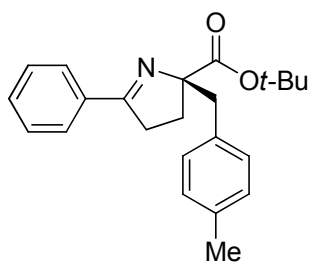

**9d**

### Area Percent Report

Data File: C:\EZChrom Elite\Enterprise\Projects\EY\EY39(AD-H 99 1 1 254nm).dat

Sample ID: EY39 (9d, 4-Me)

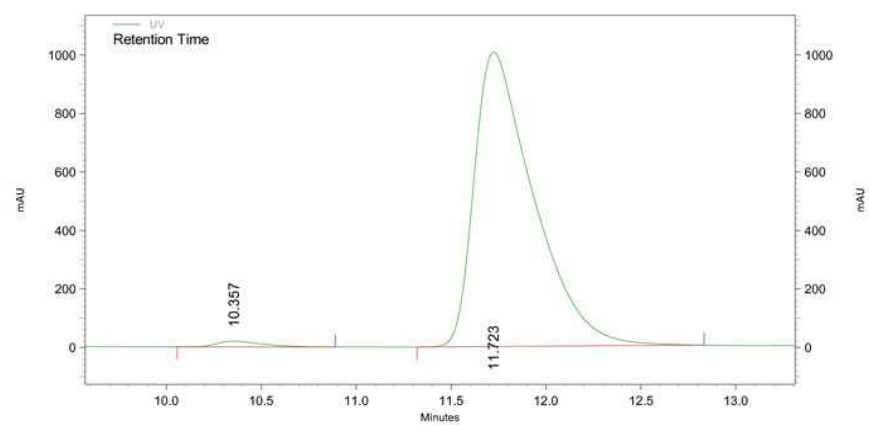

#### UV Results

| Name | Retention Time | Area     | Area Percent | Integration Codes |
|------|----------------|----------|--------------|-------------------|
|      | 10.357         | 1311174  | 1.477        | BB                |
|      | 11.723         | 87490227 | 98.523       | BI                |

|        |  |          |         |  |
|--------|--|----------|---------|--|
| Totals |  | 88801401 | 100.000 |  |
|--------|--|----------|---------|--|

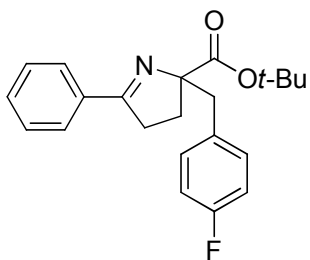

**9e**

### Area Percent Report

Data File: C:\EZChrom Elite\Enterprise\Projects\EY\EY23(OD-H 99 1 1 254nm).dat

Sample ID: EY23 (9e, 4-F)

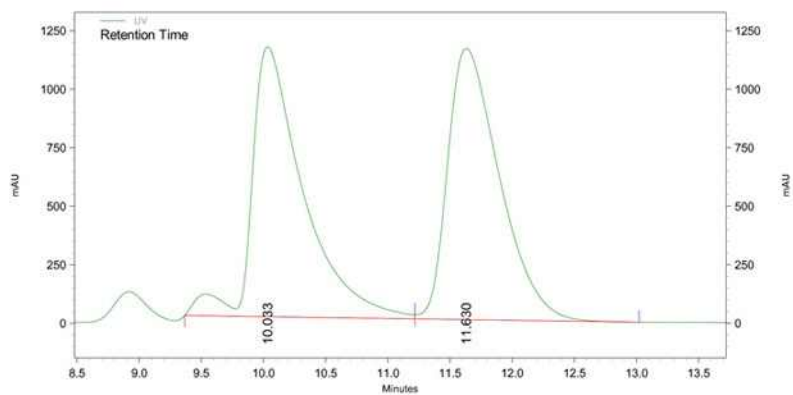

| UV Results |                |           |              |                   |
|------------|----------------|-----------|--------------|-------------------|
| Name       | Retention Time | Area      | Area Percent | Integration Codes |
|            | 10.033         | 133021096 | 49.764       | IV                |
|            | 11.630         | 134280468 | 50.236       | VB                |
| Totals     |                | 267301564 | 100.000      |                   |

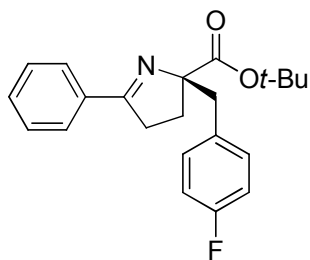

**9e**

### Area Percent Report

Data File: C:\EZChrom Elite\Enterprise\Projects\YJ\YJ273(OD-H 99 1 254nm)-2.dat

Sample ID: YJ273 (9e, 4-F)

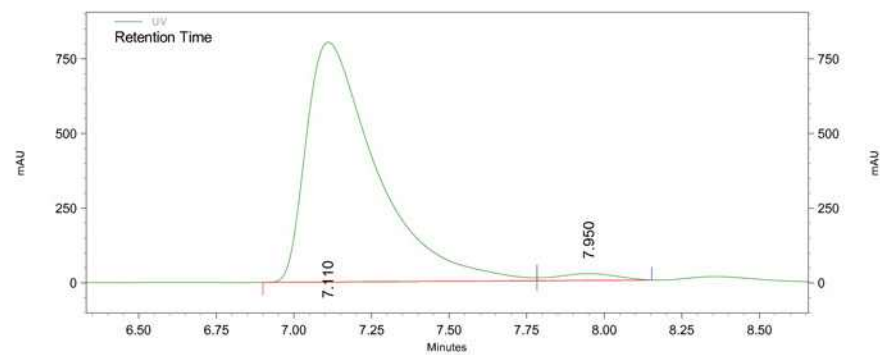

| UV Results |                |          |              |                   |
|------------|----------------|----------|--------------|-------------------|
| Name       | Retention Time | Area     | Area Percent | Integration Codes |
|            | 7.110          | 50578234 | 97.692       | BV                |
|            | 7.950          | 1194754  | 2.308        | VI                |
| Totals     |                | 51772988 | 100.000      |                   |

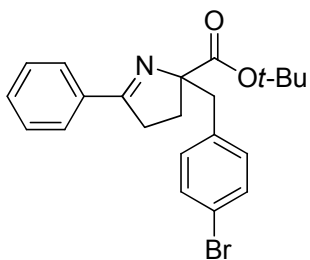

**9f**

### Area Percent Report

Data File: C:\EZChrom Elite\Enterprise\Projects\YJ\YJ293(AS-H 99 1 1 254nm).dat

Sample ID: YJ293 (9f, 4-Br)

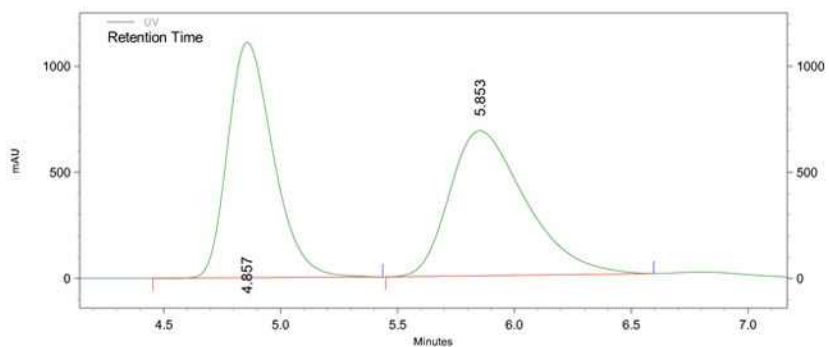

#### UV Results

| Name | Retention Time | Area     | Area Percent | Integration Codes |
|------|----------------|----------|--------------|-------------------|
|      | 4.857          | 59792744 | 49.188       | IB                |
|      | 5.853          | 61766893 | 50.812       | BB                |

|        |  |           |         |  |
|--------|--|-----------|---------|--|
| Totals |  | 121559637 | 100.000 |  |
|--------|--|-----------|---------|--|

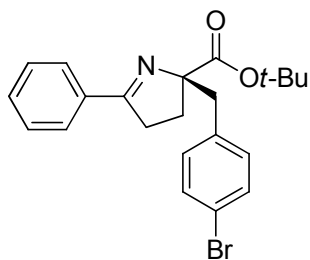

**9f**

### Area Percent Report

Data File: C:\EZChrom Elite\Enterprise\Projects\YJ\YJ292(AS-H 99 1 1 254nm)-2.dat

Sample ID: YJ292 (9f, 4-Br)

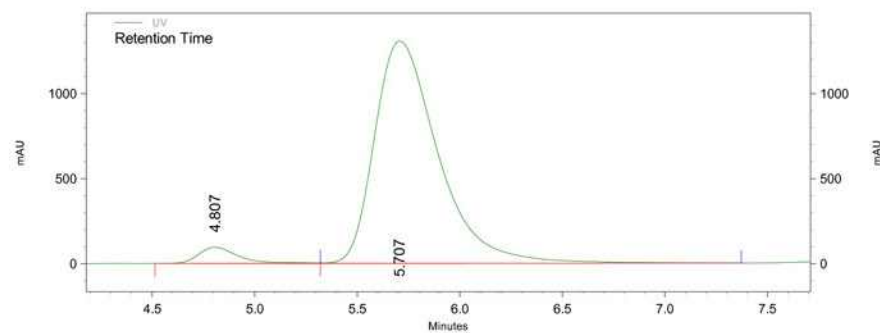

#### UV Results

| Name | Retention Time | Area      | Area Percent | Integration Codes |
|------|----------------|-----------|--------------|-------------------|
|      | 4.807          | 5127487   | 4.361        | IV                |
|      | 5.707          | 112444742 | 95.639       | VB                |

|        |  |           |         |  |
|--------|--|-----------|---------|--|
| Totals |  | 117572229 | 100.000 |  |
|--------|--|-----------|---------|--|

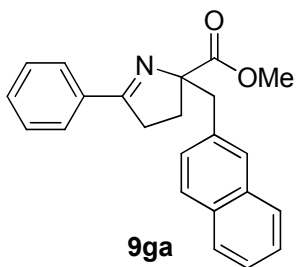

### Area Percent Report

Data File: C:\EZChrom Elite\Enterprise\Projects\YJ\YJ277(AD-H 99 1 254nm).dat

Sample ID: YJ277 (9g, Naphth)

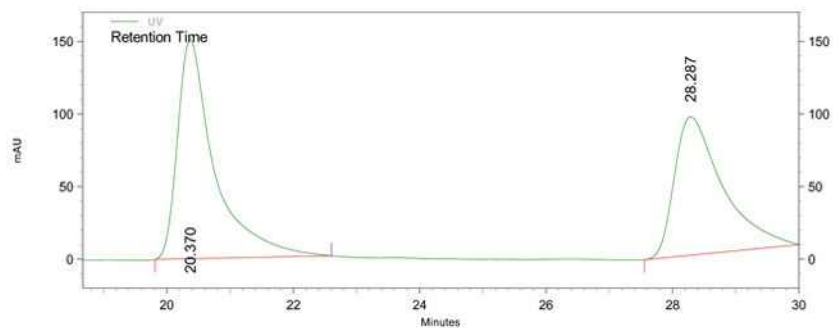

#### UV Results

| Name   | Retention Time | Area     | Area Percent | Integration Codes |
|--------|----------------|----------|--------------|-------------------|
|        | 20.370         | 24379527 | 54.763       | II                |
|        | 28.287         | 20138707 | 45.237       | BE                |
| Totals |                | 44518234 | 100.000      |                   |

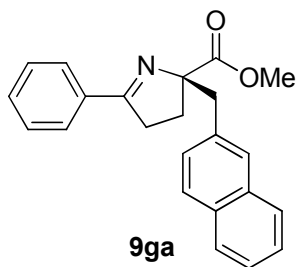

### Area Percent Report

Data File: C:\EZChrom Elite\Enterprise\Projects\YJ\YJ281(AD-H 99 1 254nm).dat

Sample ID: YJ281 (9g, Naph)

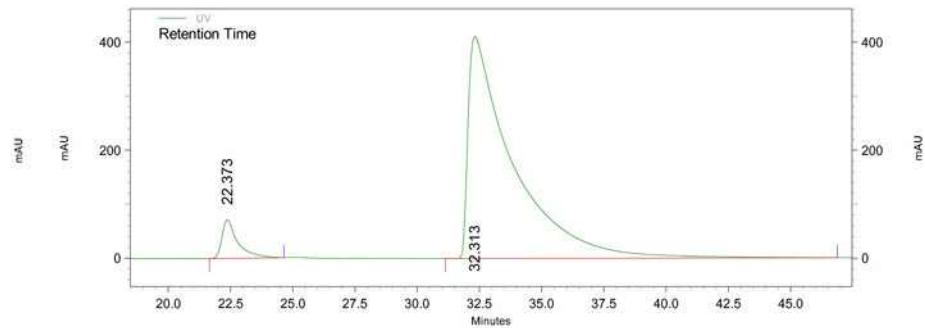

#### UV Results

| Name   | Retention Time | Area      | Area Percent | Integration Codes |
|--------|----------------|-----------|--------------|-------------------|
|        | 22.373         | 12620773  | 5.771        | BI                |
|        | 32.313         | 206090665 | 94.229       | IB                |
| Totals |                | 218711438 | 100.000      |                   |
